# Supplementary material for: Transcriptome Analysis of Genes Regulated by Cholesterol Loading in Two Strains of Mouse Macrophages Associates Lysosome Pathway and ER Stress Response with Atherosclerosis Susceptibility
Source: PLOS journal article supplement (doi:10.1371/journal.pone.0065003), 2013-05-21
Supplement: S1 (10.1371/journal.pone.0065003.s001) [file journal.pone.0065003.s001]

# Supplemental Figure S1

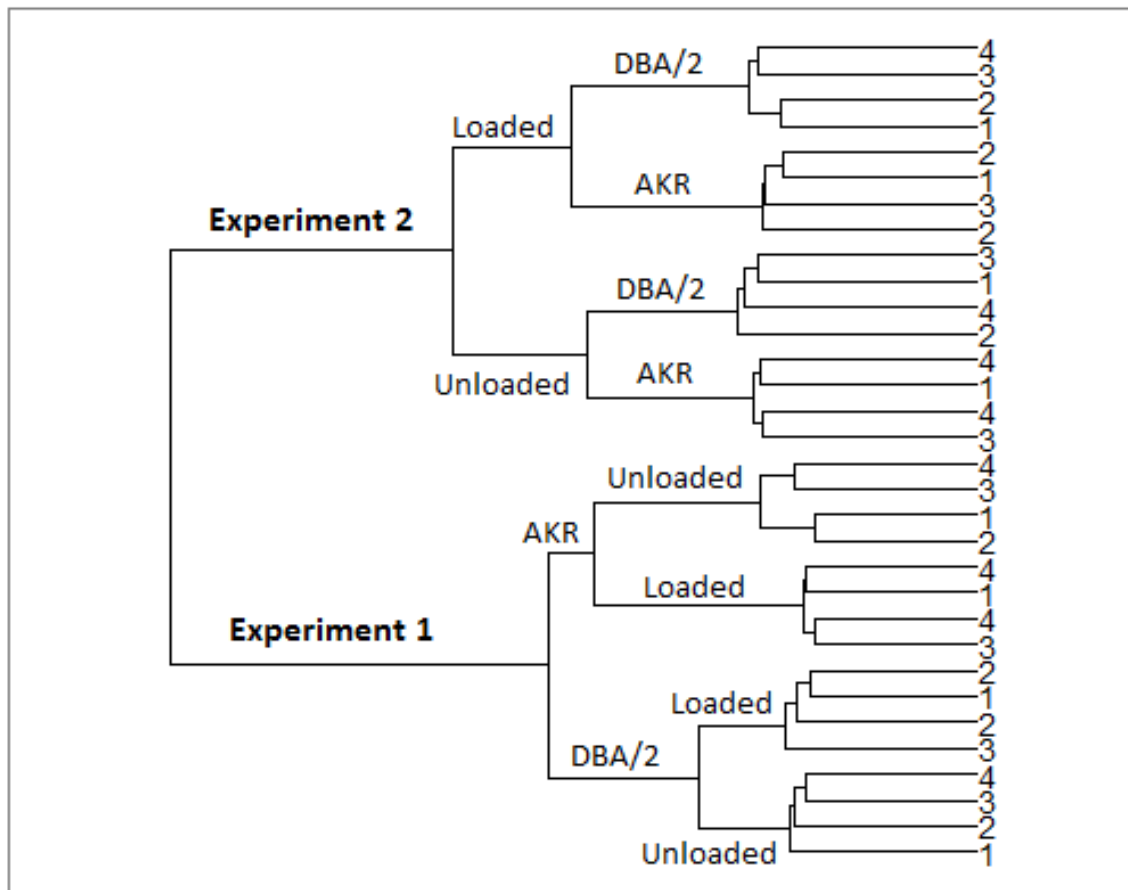

**Figure S1: Hierarchical clustering analysis of 32 samples included in the study.** Four replicates each for control and cholesterol loaded macrophages from AKR and DBA/2 strain, both independent experiments were included (loaded; unloaded samples).
