# Supplementary material for: Transcriptome Analysis of Genes Regulated by Cholesterol Loading in Two Strains of Mouse Macrophages Associates Lysosome Pathway and ER Stress Response with Atherosclerosis Susceptibility
Source: PLOS journal article supplement (doi:10.1371/journal.pone.0065003), 2013-05-21
Supplement: S2 (10.1371/journal.pone.0065003.s002) [file journal.pone.0065003.s002]

Supplemental Figure S2

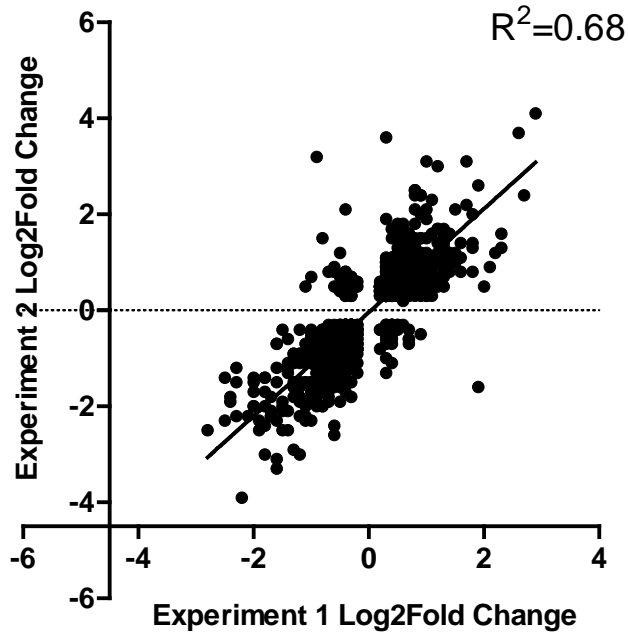

**Figure S2: Conservation of cholesterol induced changes in macrophage gene expression in two independent experiments.** Linear regression analysis of log2 fold changes of the 1,140 overlapping transcripts between experiment 1 and experiment 2 dataset that are significantly regulated by cholesterol loading in one or both strains. P-value of linear regression <0.0001.
