# Supplementary material for: Transcriptome Analysis of Genes Regulated by Cholesterol Loading in Two Strains of Mouse Macrophages Associates Lysosome Pathway and ER Stress Response with Atherosclerosis Susceptibility
Source: PLoS One. 2013 May 21;8(5):e65003. doi: 10.1371/journal.pone.0065003 (PMC3660362; doi:10.1371/journal.pone.0065003)
Supplement: Table S2 — Differentially Expressed Transcripts between AKR and DBA in Unloaded BMM (experiment 2). (XLS) [file pone.0065003.s004.xls]

## Sheet: Sheet1
Table S2: Differentially Expressed Transcripts between AKR and DBA in Unloaded BMM (experiment 2)
Gene Symbol	Log2Fold Change	P.Value	FDR Adjusted P-Value
H2-K1	4.28661	9.41562e-14	1.12225e-09
Pilrb1	5.15141	5.22966e-13	1.4127e-09
H2-Q5	4.7454	7.11151e-13	1.4127e-09
H2-Q8	4.57703	2.79844e-13	1.4127e-09
Eif2s3y	4.43647	3.86923e-13	1.4127e-09
Prcp	3.31715	6.50745e-13	1.4127e-09
Lrrc57	3.59695	4.99324e-12	8.50206e-09
Ogfrl1	3.10838	6.25842e-12	9.32427e-09
Napsa	-3.0559	7.18779e-12	9.51903e-09
AA881470	3.3209	8.07939e-12	9.62982e-09
Serpina3g	3.20564	1.22861e-11	1.33125e-08
Fxyd2	-3.64841	1.74026e-11	1.72852e-08
Ero1lb	3.12476	2.68959e-11	2.18859e-08
Atp2a3	2.60356	2.75433e-11	2.18859e-08
Atp2a3	2.60211	2.60106e-11	2.18859e-08
LOC547343	4.02786	3.15704e-11	2.35179e-08
Fblim1	3.60956	5.54868e-11	3.44002e-08
Slc13a3	3.60494	6.63819e-11	3.44002e-08
Cox6a2	2.42614	6.43675e-11	3.44002e-08
Sfi1	2.29416	5.50708e-11	3.44002e-08
LOC100048020	-2.00629	6.41681e-11	3.44002e-08
Zfp277	-2.14994	5.12066e-11	3.44002e-08
Napsa	-2.74917	6.40226e-11	3.44002e-08
Abcb1b	3.06785	7.77012e-11	3.85884e-08
Insl6	2.32358	9.32983e-11	4.3485e-08
E2f2	-2.54647	9.48579e-11	4.3485e-08
Rbm45	2.05155	1.00176e-10	4.42219e-08
Akr1e1	2.79915	1.19125e-10	4.89602e-08
Ephx1	-2.37739	1.16514e-10	4.89602e-08
Paip1	2.19819	1.64517e-10	6.53624e-08
Anxa4	2.11372	1.74366e-10	6.70408e-08
Ccnd2	2.44831	1.87244e-10	6.97426e-08
A630042L21Rik	1.73271	2.05588e-10	7.42545e-08
Usp39	2.06065	2.34233e-10	8.21123e-08
Stab2	2.25814	2.60018e-10	8.85472e-08
Aqr	2.3566	2.79403e-10	9.25058e-08
Ctsh	1.82254	3.00361e-10	9.67569e-08
Slamf9	2.3814	3.18641e-10	9.99444e-08
Mrpl10	2.46938	3.59008e-10	1.09718e-07
Axl	1.70498	4.07935e-10	1.21554e-07
BC022687	-2.59819	4.25637e-10	1.23736e-07
E2f2	-2.16866	4.6985e-10	1.33337e-07
2210012G02Rik	-2.29097	5.10773e-10	1.41579e-07
F13a1	2.1558	5.47112e-10	1.48205e-07
Fxyd2	-2.57455	6.74545e-10	1.78665e-07
Pdxdc1	1.97011	7.41071e-10	1.92018e-07
Rapgef5	2.03092	7.78143e-10	1.97334e-07
Gm962	1.73941	8.48306e-10	2.10645e-07
LOC100048845	-1.74407	9.57596e-10	2.3293e-07
Cap1	1.66774	1.05631e-09	2.506e-07
Folr2	-2.89949	1.07229e-09	2.506e-07
Gm962	1.63059	1.1593e-09	2.60712e-07
EG630499	-2.47686	1.1443e-09	2.60712e-07
Ryk	-1.68653	1.31024e-09	2.89199e-07
Usp2	2.25117	1.35073e-09	2.92715e-07
Adam23	2.38008	1.48002e-09	3.10614e-07
H2-M2	-2.17367	1.48544e-09	3.10614e-07
Rps2	1.44033	1.53839e-09	3.16139e-07
Nasp	-1.38873	1.60916e-09	3.25078e-07
Lrg1	-1.9596	1.75788e-09	3.49204e-07
AI451617	2.08188	1.83587e-09	3.58717e-07
Rbbp9	-1.47473	1.89638e-09	3.58778e-07
Thumpd1	-3.59744	1.88142e-09	3.58778e-07
1200013B08Rik	1.7427	1.94737e-09	3.62668e-07
Chst7	1.61164	2.14362e-09	3.93074e-07
Osbpl3	1.91313	2.24836e-09	4.06034e-07
Cd276	-2.92429	2.292e-09	4.07737e-07
Gps2	-1.36982	2.39228e-09	4.19318e-07
Itpr1	1.40743	2.61543e-09	4.45333e-07
Apobec1	-1.84141	2.61422e-09	4.45333e-07
Mff	2.35062	2.7416e-09	4.60241e-07
Sfi1	2.03945	2.82968e-09	4.6843e-07
Eif4el3	-1.3527	2.92307e-09	4.77261e-07
Myo5a	-1.83933	3.043e-09	4.90128e-07
Gpr85	1.59977	3.51359e-09	5.46288e-07
Plscr4	-1.32129	3.52917e-09	5.46288e-07
Enpp1	-1.44593	3.51304e-09	5.46288e-07
Alg8	1.62458	3.65386e-09	5.58338e-07
G430022H21Rik	-2.40177	3.71049e-09	5.59814e-07
Fnbp1l	1.80617	3.93692e-09	5.86553e-07
LOC100047619	2.22457	4.19289e-09	6.08429e-07
Cxcl14	2.05677	4.2369e-09	6.08429e-07
Fxyd2	-2.11296	4.19442e-09	6.08429e-07
Rab39	1.58989	4.37104e-09	6.2022e-07
Atg9b	1.79269	4.47106e-09	6.26948e-07
Fgl2	2.67252	4.90684e-09	6.80054e-07
4933439C20Rik	1.377	5.15814e-09	7.06666e-07
Ext1	1.36866	5.32047e-09	7.20621e-07
Mrpl48	-1.30472	5.74035e-09	7.68755e-07
S100a8	-1.90912	6.09246e-09	8.06845e-07
Mgst2	-1.76734	6.34251e-09	8.26823e-07
Sphk1	-1.94952	6.38205e-09	8.26823e-07
Parvg	-1.7705	6.88962e-09	8.82982e-07
4930455C21Rik	-1.44262	7.19489e-09	9.10846e-07
Cd28	-1.7785	7.25987e-09	9.10846e-07
Osbpl3	1.38904	7.43359e-09	9.22926e-07
Msr2	2.56937	7.53149e-09	9.25441e-07
Slc13a3	3.46651	7.85588e-09	9.29552e-07
Ddit3	1.26633	7.8769e-09	9.29552e-07
F10	-1.37239	7.69129e-09	9.29552e-07
Klf9	-2.37365	7.73368e-09	9.29552e-07
Atpbd3	-1.36855	8.57594e-09	1.00212e-06
S100a1	-1.50564	9.36612e-09	1.08383e-06
Hps6	-1.344	9.57517e-09	1.08983e-06
LOC100044475	-1.48285	9.60078e-09	1.08983e-06
C2	-1.73159	1.03202e-08	1.16043e-06
0610037D15Rik	1.63682	1.04407e-08	1.16301e-06
Tuft1	-1.38107	1.0685e-08	1.17921e-06
St7	1.61401	1.09914e-08	1.20189e-06
Prc1	-1.58777	1.17397e-08	1.26059e-06
Rps3	-1.99979	1.16561e-08	1.26059e-06
Ifit2	1.70408	1.24538e-08	1.31876e-06
Abhd1	-1.90261	1.25027e-08	1.31876e-06
Abhd1	-1.43184	1.26267e-08	1.32015e-06
Phf11	1.97233	1.38147e-08	1.43181e-06
Phf11	1.98123	1.42501e-08	1.4642e-06
Mrps6	-1.40081	1.48001e-08	1.50771e-06
Cd177	-1.28416	1.51941e-08	1.53474e-06
Abcd3	-1.51708	1.61069e-08	1.61326e-06
LOC100047934	1.29168	1.67269e-08	1.6614e-06
Crym	2.42042	1.75207e-08	1.72586e-06
9630015D15Rik	-1.54148	1.78636e-08	1.74522e-06
Fcgr4	1.40362	2.02029e-08	1.85287e-06
Bcl2l11	-1.12348	1.91955e-08	1.85287e-06
Blm	-1.25429	2.02092e-08	1.85287e-06
Anln	-1.26503	1.98467e-08	1.85287e-06
Birc5	-1.31886	1.95058e-08	1.85287e-06
Sort1	-1.78315	1.98332e-08	1.85287e-06
Kynu	-1.96124	1.99398e-08	1.85287e-06
Prss22	-2.11074	2.01411e-08	1.85287e-06
Fcgr1	1.14387	2.14867e-08	1.92415e-06
Nasp	-1.30188	2.1264e-08	1.92415e-06
Enpp1	-1.54078	2.16323e-08	1.92415e-06
Gp38	-1.81411	2.13566e-08	1.92415e-06
Sccpdh	-1.08351	2.27652e-08	2.00992e-06
Eprs	1.1062	2.30932e-08	2.02389e-06
Ltb	2.20905	2.50914e-08	2.16904e-06
BC006779	1.29052	2.52955e-08	2.16904e-06
Mid1	-1.78872	2.51453e-08	2.16904e-06
Hal	-4.0271	2.57214e-08	2.18981e-06
Cd55	2.18422	2.62371e-08	2.21787e-06
Arhgap24	-1.42025	2.72263e-08	2.28529e-06
Gemin6	1.26399	2.81966e-08	2.35018e-06
LOC625360	2.08719	2.90128e-08	2.36852e-06
Soat1	1.63545	2.87822e-08	2.36852e-06
Med23	1.45304	2.89627e-08	2.36852e-06
Il11ra1	1.18233	3.32216e-08	2.68594e-06
Plxdc1	-1.48425	3.33517e-08	2.68594e-06
Cpne8	1.16313	3.37019e-08	2.69592e-06
Cd86	1.19031	3.43461e-08	2.72554e-06
Tk1	-1.37962	3.45294e-08	2.72554e-06
Rnf41	1.49655	3.47977e-08	2.72864e-06
Stat1	1.17098	3.61148e-08	2.81341e-06
Cp	1.77094	3.72334e-08	2.82916e-06
Agap1	-1.34442	3.69776e-08	2.82916e-06
Agtrap	-1.66994	3.72664e-08	2.82916e-06
Snn	-1.70784	3.70864e-08	2.82916e-06
A4galt	1.76984	3.81412e-08	2.87725e-06
Asb2	2.63994	3.88762e-08	2.88025e-06
Asns	1.46008	3.91477e-08	2.88025e-06
AI451557	1.21777	3.89889e-08	2.88025e-06
2210012G02Rik	-1.78426	3.8912e-08	2.88025e-06
1500031L02Rik	-1.06123	3.96973e-08	2.90277e-06
Smox	-1.20304	4.08128e-08	2.96614e-06
1190005F20Rik	1.08804	4.14086e-08	2.99121e-06
9130422G05Rik	1.65073	4.61533e-08	3.31386e-06
Sort1	-1.61136	4.79984e-08	3.4257e-06
Igtp	1.20558	4.83002e-08	3.42673e-06
Hmgn2	1.35571	4.96519e-08	3.50178e-06
Zfp30	1.22889	5.09208e-08	3.57015e-06
Cox18	1.00405	5.20347e-08	3.62691e-06
Ifit2	1.69624	5.27319e-08	3.65414e-06
Mrpl48	-1.2546	5.3745e-08	3.70282e-06
Cd86	1.16237	5.86426e-08	4.01702e-06
Bcat2	1.07219	6.09371e-08	4.15034e-06
BC026585	-2.05927	6.22511e-08	4.21574e-06
D14Ertd668e	1.43245	6.50646e-08	4.38138e-06
Lst1	1.27361	6.65483e-08	4.43122e-06
Capsl	-1.84364	6.64947e-08	4.43122e-06
Sys1	1.11119	6.71996e-08	4.44973e-06
Amica1	1.56502	6.84417e-08	4.50694e-06
Cd74	-1.29456	7.26647e-08	4.75874e-06
Aif1	1.28609	7.37083e-08	4.8007e-06
2210012G02Rik	-1.65317	7.46864e-08	4.83797e-06
Sult1a1	-1.3755	7.66561e-08	4.93873e-06
Gstm2	-1.25281	7.95557e-08	5.09541e-06
Snx5	-1.86497	7.9943e-08	5.09541e-06
Tspan17	-1.02065	8.42794e-08	5.34322e-06
BC094916	1.68503	8.5993e-08	5.42302e-06
Cd69	1.58297	8.7295e-08	5.4473e-06
Man2a2	-1.10478	8.72289e-08	5.4473e-06
Nasp	-1.16847	8.77491e-08	5.4473e-06
Pop4	1.12023	8.95849e-08	5.53245e-06
Gpnmb	-3.34841	9.05482e-08	5.56311e-06
Tmem8	1.12588	9.17939e-08	5.61072e-06
Mgst3	-1.17309	9.47042e-08	5.75908e-06
Gnl2	1.07203	9.54103e-08	5.77257e-06
Sla	1.51959	9.59231e-08	5.77428e-06
Tes	1.01692	9.90594e-08	5.93311e-06
Sell	1.3561	1.00463e-07	5.9871e-06
Ercc5	1.76037	1.05046e-07	6.19825e-06
Tmem87a	1.25995	1.04999e-07	6.19825e-06
Ccrk	-0.930955	1.08602e-07	6.37649e-06
Pde2a	-1.35873	1.09577e-07	6.40221e-06
Gclm	-1.19203	1.10615e-07	6.43132e-06
Mrps10	-1.14675	1.11545e-07	6.45388e-06
Gnaq	-0.977261	1.13239e-07	6.52029e-06
Nupr1	1.14954	1.1871e-07	6.76987e-06
Cercam	-1.23067	1.18692e-07	6.76987e-06
Slc1a4	1.60814	1.24028e-07	7.00613e-06
Slc44a1	-1.14576	1.23806e-07	7.00613e-06
OTTMUSG00000010673	-2.2467	1.25659e-07	7.06476e-06
5033414K04Rik	1.03874	1.29107e-07	7.22456e-06
Stat1	1.16961	1.34528e-07	7.4398e-06
Acot1	-1.03835	1.34827e-07	7.4398e-06
Rsf1	-1.20316	1.34797e-07	7.4398e-06
H2-T10	-1.29064	1.38016e-07	7.58071e-06
Add3	-0.956465	1.42094e-07	7.73342e-06
Unc45a	-1.00699	1.41702e-07	7.73342e-06
Slco3a1	1.3949	1.50327e-07	8.14429e-06
Dennd2a	-1.11133	1.51339e-07	8.14767e-06
Ctsl	-1.61719	1.51756e-07	8.14767e-06
Ifit3	1.41574	1.55987e-07	8.33725e-06
Ryk	-1.2638	1.61186e-07	8.57669e-06
Gtpbp4	1.02683	1.65444e-07	8.76412e-06
Cd86	1.00218	1.7039e-07	8.98617e-06
Kif3a	-1.43773	1.71788e-07	9.02001e-06
Bhlhb2	-2.10001	1.73402e-07	9.0648e-06
Grwd1	1.39797	1.74371e-07	9.06971e-06
Birc5	-1.08923	1.75018e-07	9.06971e-06
Pdk1	1.27343	1.82327e-07	9.40762e-06
B230312I18Rik	-1.08739	1.84123e-07	9.45933e-06
Atp8a1	1.10167	1.86763e-07	9.52762e-06
2610305D13Rik	-1.59349	1.87051e-07	9.52762e-06
Ccl7	1.88763	1.88823e-07	9.54361e-06
H2-DMa	1.0507	1.88967e-07	9.54361e-06
Emr1	1.13493	1.91631e-07	9.63736e-06
Pmp22	-1.06658	1.97789e-07	9.86378e-06
Abi2	-1.29763	1.97107e-07	9.86378e-06
Plxdc1	-1.02461	2.04352e-07	1.01486e-05
Stard4	1.06368	2.06902e-07	1.01903e-05
Ctsk	-1.73337	2.06629e-07	1.01903e-05
Rasgrp1	2.55721	2.18608e-07	1.05951e-05
Deadc1	-1.14928	2.18675e-07	1.05951e-05
Vps39	-1.19776	2.17721e-07	1.05951e-05
Furin	-1.23359	2.17138e-07	1.05951e-05
Aif1	1.45692	2.20916e-07	1.06603e-05
Rnps1	1.54865	2.2467e-07	1.07978e-05
Ltb4r1	-1.03936	2.3068e-07	1.10421e-05
Usp18	1.00356	2.3938e-07	1.13672e-05
Hmgn3	-1.24057	2.39198e-07	1.13672e-05
Asns	1.36331	2.55924e-07	1.21046e-05
Angptl7	-1.2222	2.58885e-07	1.21963e-05
Hyou1	1.10264	2.62609e-07	1.23043e-05
Egr2	-1.09075	2.63243e-07	1.23043e-05
D12Ertd553e	1.04069	2.70301e-07	1.25848e-05
Camk2b	1.28146	2.77748e-07	1.28682e-05
Gpnmb	-4.65119	2.78546e-07	1.28682e-05
Psmb6	-5.16786	2.79779e-07	1.28752e-05
Nars	0.945138	2.8723e-07	1.31673e-05
Hoxb7	-1.02741	2.91337e-07	1.33044e-05
Pofut1	0.962456	2.94483e-07	1.33657e-05
Heatr1	0.894381	2.94923e-07	1.33657e-05
Abi2	-1.30049	3.00568e-07	1.357e-05
LOC100044172	-1.00721	3.04485e-07	1.36949e-05
Gvin1	1.06123	3.06186e-07	1.37197e-05
Zfp52	-1.21393	3.08279e-07	1.37617e-05
P2ry1	-1.95937	3.2161e-07	1.43033e-05
Tmem180	0.964389	3.2406e-07	1.43586e-05
Tada1l	-1.10832	3.32336e-07	1.46708e-05
Tm2d3	-1.08069	3.3498e-07	1.47329e-05
Gja1	1.05766	3.37454e-07	1.47872e-05
Pbk	-1.6574	3.48644e-07	1.52216e-05
Slc25a3	1.00733	3.55032e-07	1.54439e-05
LOC435565	1.42442	3.59954e-07	1.54994e-05
Slamf8	-0.974973	3.60208e-07	1.54994e-05
Gjb4	-1.42149	3.58348e-07	1.54994e-05
Sord	-1.47836	3.6707e-07	1.57378e-05
Ifitm1	-1.64539	3.68833e-07	1.57567e-05
Scamp5	1.17284	3.74704e-07	1.59503e-05
Mboat1	-1.04828	3.85867e-07	1.63671e-05
4930570C03Rik	-0.79954	3.87284e-07	1.63689e-05
Soat2	1.70718	3.94175e-07	1.64848e-05
Ehd4	0.855874	3.93229e-07	1.64848e-05
Gngt2	-0.885222	3.93079e-07	1.64848e-05
Pard6g	-1.24902	3.99075e-07	1.66314e-05
Cd33	-1.1811	4.04675e-07	1.6806e-05
Cdkn2aipnl	-0.979431	4.08758e-07	1.69166e-05
C130026I21Rik	1.90381	4.10742e-07	1.69399e-05
Pycard	1.236	4.24768e-07	1.74368e-05
Ivns1abp	-0.935652	4.25715e-07	1.74368e-05
Usp38	1.23948	4.28802e-07	1.7503e-05
C330023M02Rik	0.910491	4.30558e-07	1.75147e-05
Mospd3	-0.96459	4.40421e-07	1.7855e-05
Rhbdf1	-0.963829	4.48044e-07	1.81025e-05
Sla	1.11449	4.62952e-07	1.85965e-05
Ccr5	1.09912	4.63392e-07	1.85965e-05
Mlycd	1.02116	4.7855e-07	1.91404e-05
Bid	0.952473	4.81502e-07	1.91941e-05
Gstm1	-0.917943	4.84635e-07	1.92545e-05
Man2a2	-1.04323	4.99165e-07	1.9766e-05
Lcn2	1.41897	5.05714e-07	1.99082e-05
Kif3a	-1.45937	5.06098e-07	1.99082e-05
Sfrs7	0.900247	5.10855e-07	1.99739e-05
Pigx	-0.890821	5.11119e-07	1.99739e-05
Nusap1	-1.16456	5.25536e-07	2.04702e-05
Lox	2.13297	5.42712e-07	2.10562e-05
LOC667370	1.41874	5.44115e-07	2.10562e-05
Smad2	1.0036	5.48317e-07	2.11501e-05
LOC100045359	0.961088	5.52646e-07	2.12181e-05
Gmpr	-1.13899	5.54746e-07	2.12181e-05
Gpnmb	-3.41317	5.55419e-07	2.12181e-05
Ifit3	1.24034	5.62144e-07	2.14064e-05
Pik3cg	-0.915646	5.66685e-07	2.15106e-05
D14Ertd668e	1.52062	5.71042e-07	2.16071e-05
BC031748	-1.1683	5.85409e-07	2.20807e-05
Cd79b	1.52804	6.00587e-07	2.25397e-05
Acss1	-1.11537	6.01361e-07	2.25397e-05
Chst1	1.20072	6.21832e-07	2.32339e-05
Ddx6	1.31112	6.32775e-07	2.35689e-05
Zmiz1	0.968279	6.46362e-07	2.39781e-05
Cat	0.885585	6.47785e-07	2.39781e-05
Cxcl14	1.74635	6.52874e-07	2.40917e-05
Mx2	1.28641	6.90351e-07	2.50863e-05
Ccrk	-0.951021	6.83253e-07	2.50863e-05
Bmpr1a	-1.05941	6.87622e-07	2.50863e-05
Mgll	-1.27286	6.90219e-07	2.50863e-05
B930041F14Rik	-1.33122	6.8699e-07	2.50863e-05
Blm	-1.38507	6.93907e-07	2.51388e-05
Mrpl10	-0.816896	7.02628e-07	2.53777e-05
Ivns1abp	-0.960272	7.17448e-07	2.58346e-05
OTTMUSG00000000971	-0.967193	7.23499e-07	2.5974e-05
Heatr1	0.825569	7.30428e-07	2.61441e-05
Rsad2	1.25893	7.40042e-07	2.64089e-05
Lca5	1.06914	7.64074e-07	2.71042e-05
BC004044	-1.21068	7.63786e-07	2.71042e-05
Oas3	1.18971	7.72483e-07	2.73211e-05
Oasl2	0.919493	7.75745e-07	2.73553e-05
Pdlim4	0.935004	8.04457e-07	2.82842e-05
BC006779	1.10852	8.06934e-07	2.82878e-05
Ctsc	0.968414	8.11294e-07	2.83572e-05
Aars	0.758479	8.25622e-07	2.87737e-05
Ptpn22	1.3737	8.28387e-07	2.87858e-05
Ier5l	-0.950394	8.47622e-07	2.93686e-05
Arhgap4	0.842501	8.54218e-07	2.95114e-05
Tnfrsf21	-1.24337	8.57086e-07	2.95249e-05
Tle1	0.952796	8.75658e-07	3.00734e-05
Vamp4	0.809866	8.78688e-07	3.00734e-05
Ttc3	-0.931776	8.80579e-07	3.00734e-05
Pfn2	-1.00649	8.86212e-07	3.01793e-05
AA407659	-0.927849	9.0262e-07	3.06505e-05
Chic2	-0.915341	9.0894e-07	3.07774e-05
Ctsc	1.03198	9.21187e-07	3.11038e-05
Hnrpll	-1.12805	9.41002e-07	3.16831e-05
Klra2	1.47677	9.52919e-07	3.19939e-05
Hcls1	0.749416	9.58266e-07	3.20475e-05
Pcdha6	-1.46557	9.59891e-07	3.20475e-05
Icos	-1.43543	9.63337e-07	3.20727e-05
Emr1	0.950841	9.87133e-07	3.27734e-05
Mapkapk3	0.796906	9.94841e-07	3.29375e-05
Jdp2	0.827071	1.00025e-06	3.30248e-05
Ncaph	0.772911	1.01583e-06	3.34467e-05
Wdr22	0.95137	1.03624e-06	3.39311e-05
Arl11	-0.774727	1.03371e-06	3.39311e-05
Slco3a1	1.13212	1.06401e-06	3.44047e-05
Chic2	-0.877273	1.05791e-06	3.44047e-05
Pdxdc1	-1.03945	1.05772e-06	3.44047e-05
Satb1	-1.10695	1.06147e-06	3.44047e-05
Gstm2	-1.19246	1.06513e-06	3.44047e-05
Zfp87	0.88943	1.06988e-06	3.44646e-05
Tm4sf5	1.25092	1.0812e-06	3.4642e-05
Abhd1	-1.86407	1.07934e-06	3.4642e-05
Eml4	-0.82705	1.08947e-06	3.48134e-05
Gtf2h2	0.856056	1.11362e-06	3.54899e-05
Tyms	-1.12023	1.11729e-06	3.55119e-05
Dgcr6	-1.01675	1.12477e-06	3.56546e-05
Frag1	1.10978	1.14286e-06	3.61319e-05
Ccr5	0.928173	1.18438e-06	3.7149e-05
AA407659	-0.86945	1.17883e-06	3.7149e-05
Gpc1	-1.00769	1.18184e-06	3.7149e-05
LOC100047579	1.58682	1.19756e-06	3.74638e-05
LOC100048346	1.14893	1.22072e-06	3.80883e-05
Efcab4a	-0.874171	1.2287e-06	3.82374e-05
LOC100048556	0.99029	1.23829e-06	3.84353e-05
Sipa1l1	1.0872	1.24158e-06	3.84374e-05
Fpr2	0.980664	1.24711e-06	3.85086e-05
Dhx58	1.04035	1.28506e-06	3.95778e-05
Unc45a	-0.897695	1.30471e-06	4.00795e-05
Nfkbiz	1.64716	1.34536e-06	4.12161e-05
Chchd8	-0.973449	1.34863e-06	4.12161e-05
Lyz1	-0.872067	1.38798e-06	4.23102e-05
Trib3	1.36365	1.43953e-06	4.36584e-05
Ctsc	1.20902	1.43712e-06	4.36584e-05
Samhd1	0.861684	1.44394e-06	4.36811e-05
LOC100047651	-0.926276	1.44773e-06	4.36849e-05
9030425E11Rik	-1.03935	1.49651e-06	4.50428e-05
Gpr171	1.17497	1.50259e-06	4.51119e-05
Stat2	0.950746	1.53071e-06	4.58407e-05
F7	-1.04328	1.54386e-06	4.61184e-05
Wtip	-0.786254	1.56442e-06	4.66159e-05
Mylk	0.874943	1.59873e-06	4.71955e-05
Unc119b	-0.950269	1.59523e-06	4.71955e-05
Stx8	-1.18451	1.59151e-06	4.71955e-05
Bcl2a1d	-1.86946	1.59971e-06	4.71955e-05
Cdc37l1	0.85218	1.64044e-06	4.82775e-05
Ccl2	1.05422	1.65156e-06	4.8485e-05
Nfkbib	1.32011	1.66684e-06	4.88135e-05
D3Ucla1	0.896328	1.79197e-06	5.23492e-05
Lpcat2	0.724305	1.80425e-06	5.2579e-05
Gemin6	0.820163	1.81578e-06	5.27861e-05
Aqp9	1.11558	1.84113e-06	5.32153e-05
Slfn2	0.784571	1.84394e-06	5.32153e-05
Trim21	0.708834	1.83904e-06	5.32153e-05
Ryr1	-1.84612	1.88275e-06	5.4204e-05
Birc5	-1.18055	1.95037e-06	5.60156e-05
Swap70	0.766276	1.99594e-06	5.71867e-05
Akna	0.907538	2.00385e-06	5.72756e-05
Rdm1	-0.789127	2.03111e-06	5.79159e-05
Tmem63b	0.899032	2.03658e-06	5.79332e-05
Ptpla	-1.09793	2.05512e-06	5.83214e-05
Enpp4	1.34887	2.09069e-06	5.91897e-05
Fam129b	-0.801862	2.10589e-06	5.94788e-05
Elavl4	1.05379	2.1185e-06	5.96937e-05
4930486L24Rik	1.09043	2.12404e-06	5.97085e-05
6330503K22Rik	-0.858048	2.15113e-06	6.03278e-05
LOC100045300	0.7238	2.1936e-06	6.13746e-05
Rims3	1.26572	2.20105e-06	6.14387e-05
LOC100046056	1.23351	2.25413e-06	6.27732e-05
Rwdd3	0.827454	2.3026e-06	6.39736e-05
1110018J18Rik	-0.79175	2.33476e-06	6.47163e-05
Slco2b1	0.96094	2.3646e-06	6.52401e-05
H2-T23	0.885519	2.36208e-06	6.52401e-05
Adam33	1.04052	2.37795e-06	6.53058e-05
Tfrc	-0.783164	2.37578e-06	6.53058e-05
Fcer1g	-6.96807	2.39816e-06	6.57095e-05
Tes	1.01476	2.40966e-06	6.57238e-05
Swap70	0.779807	2.40971e-06	6.57238e-05
Hmgn3	-0.839079	2.43295e-06	6.62062e-05
Colec12	-1.14518	2.4521e-06	6.65754e-05
Epb4.1l3	-1.19541	2.49937e-06	6.77046e-05
Qpct	-0.841296	2.51693e-06	6.78718e-05
Sema4b	-1.26487	2.51481e-06	6.78718e-05
Phlda3	-0.886887	2.53988e-06	6.83359e-05
Mertk	-1.20342	2.56318e-06	6.88077e-05
Ebi3	0.774713	2.61978e-06	7.0169e-05
Rab34	-0.877591	2.67468e-06	7.14788e-05
Slu7	0.97475	2.76587e-06	7.37505e-05
Scamp5	0.845999	2.77907e-06	7.39369e-05
Erdr1	-2.16761	2.80347e-06	7.44201e-05
Tpm3	0.701733	2.8224e-06	7.47561e-05
St18	-1.11096	2.90325e-06	7.67268e-05
Parp1	-0.70629	2.91883e-06	7.69679e-05
Med23	0.894141	2.94079e-06	7.7376e-05
BC049806	-0.846941	2.95873e-06	7.76765e-05
Gpx3	-0.933283	2.97361e-06	7.78955e-05
Gpr68	-1.75968	2.98102e-06	7.79183e-05
Hvcn1	-0.81321	3.11398e-06	8.12155e-05
Bcl2a1c	1.36999	3.23329e-06	8.41432e-05
Thg1l	1.13924	3.25357e-06	8.44865e-05
Swap70	0.813605	3.36017e-06	8.66881e-05
Ccr5	0.779309	3.34992e-06	8.66881e-05
2410025L10Rik	0.740392	3.3585e-06	8.66881e-05
Gnpda1	-0.693701	3.40037e-06	8.75355e-05
Pml	0.859938	3.41652e-06	8.77619e-05
Nubp2	-0.657249	3.55061e-06	9.10102e-05
Mx1	1.59597	3.57148e-06	9.12462e-05
Kif22	-0.847542	3.57513e-06	9.12462e-05
Cd74	-1.2589	3.61924e-06	9.21746e-05
Dnajc16	-0.966556	3.63447e-06	9.2365e-05
Tjp2	-1.51512	3.67739e-06	9.3257e-05
Furin	-0.912504	3.70316e-06	9.37112e-05
Clec4b1	1.15466	3.75251e-06	9.47587e-05
Tyki	0.905287	3.78472e-06	9.53701e-05
Ankrd47	-1.07856	3.79335e-06	9.53859e-05
Apoe	-0.756736	3.82328e-06	9.59362e-05
5830482F20Rik	0.852057	3.85781e-06	9.63967e-05
Uaca	-0.763393	3.84974e-06	9.63967e-05
Cd33	-0.944616	3.94377e-06	9.83386e-05
Pcdhac2	-0.755004	3.95411e-06	9.83905e-05
Slc6a12	-1.07929	3.97273e-06	9.86479e-05
Zfp238	0.837375	3.98467e-06	9.87386e-05
Pilra	0.691794	4.09231e-06	0.000101196
6330442E10Rik	0.685045	4.27667e-06	0.000105536
Apbb1ip	0.843752	4.3175e-06	0.000106256
Prdx5	-0.719963	4.32369e-06	0.000106256
Chac1	2.20937	4.37824e-06	0.000107375
Isg20	1.41209	4.39095e-06	0.000107465
Ifitm6	0.920932	4.42797e-06	0.000108149
Apcdd1	-0.849336	4.48692e-06	0.000109365
Rab34	-0.709342	4.50579e-06	0.000109601
Man2a2	-0.977233	4.52401e-06	0.00010982
Tnfrsf21	-0.992628	4.54592e-06	0.000110128
EG667977	0.772617	4.59222e-06	0.000110575
Gnpda1	-0.697103	4.5883e-06	0.000110575
Uck1	-0.962447	4.58399e-06	0.000110575
Ppm2c	-0.658847	4.62717e-06	0.000111123
Rhoj	-0.998735	4.63363e-06	0.000111123
Gpr84	1.5582	4.64557e-06	0.000111186
Iigp2	0.843887	4.71451e-06	0.00011261
Clec4b1	1.38387	4.74557e-06	0.000112899
Mag	0.746703	4.7438e-06	0.000112899
Dgka	-0.808258	4.89871e-06	0.00011631
Tle4	0.772832	4.99137e-06	0.000118275
Bmpr1a	-0.892123	5.01928e-06	0.0001187
Mthfd2	1.00022	5.0326e-06	0.000118779
Myadm	-0.777999	5.08389e-06	0.000119753
Pou3f1	0.870727	5.1165e-06	0.000120283
Smox	-1.11752	5.2018e-06	0.000122048
Ccnb1	-0.75824	5.26376e-06	0.000123259
Matk	-0.905744	5.33192e-06	0.00012461
Samd9l	0.796759	5.39878e-06	0.000125926
LOC100048221	-0.644642	5.41005e-06	0.000125942
Uck1	-0.764043	5.47954e-06	0.000127311
Ly6a	1.07482	5.58493e-06	0.000129507
Cnp	0.76134	5.66529e-06	0.000131116
LOC433801	-0.943038	5.74069e-06	0.000132603
Med1	0.676307	5.78754e-06	0.000133427
Cd79b	1.27505	5.96739e-06	0.000137308
D16Ertd472e	0.841486	6.02408e-06	0.000138287
Tyms-ps	-0.907291	6.03317e-06	0.000138287
Adamtsl5	-0.689374	6.05125e-06	0.000138435
3110001A13Rik	1.12821	6.1002e-06	0.000139288
1110018J18Rik	-0.874148	6.28236e-06	0.000143173
Tbc1d2	-0.909558	6.31345e-06	0.000143607
Trpv4	-0.683054	6.36935e-06	0.000144602
Igf2bp3	-0.729346	6.44984e-06	0.000145929
Nfkb2	-1.33157	6.45226e-06	0.000145929
Zfp160	-0.87161	6.4658e-06	0.000145958
Tlr3	0.811123	6.70999e-06	0.000151184
Ube2l6	0.935106	6.87227e-06	0.000154257
Trappc2l	-0.674786	6.86951e-06	0.000154257
Unc13b	-0.711841	6.92628e-06	0.000154917
Clspn	-1.05322	6.94066e-06	0.000154917
LOC100047480	-1.06892	6.92899e-06	0.000154917
Slc9a9	-0.942273	7.07053e-06	0.000157521
Tmem8	1.06242	7.22967e-06	0.000160766
Slc7a4	-0.821941	7.44624e-06	0.000165273
Clec16a	-0.851083	7.473e-06	0.000165559
Mbd4	0.715915	7.50916e-06	0.000166051
Il10	0.887949	7.58447e-06	0.000167406
Tbc1d9b	0.81721	7.61172e-06	0.000167697
H2-Ab1	0.920477	7.87848e-06	0.000172945
Naglu	-0.842516	7.87895e-06	0.000172945
Iap	0.997237	7.97597e-06	0.000174753
Mgll	-1.75806	8.00171e-06	0.000174995
4833420G17Rik	-1.09782	8.03817e-06	0.000175471
Aatf	0.694912	8.21226e-06	0.000178943
Apbb1ip	0.840353	8.32439e-06	0.000179706
Stoml1	0.802928	8.3099e-06	0.000179706
Tmem65	-0.611349	8.35279e-06	0.000179706
Nicn1	-0.612672	8.27247e-06	0.000179706
Gadd45g	-0.772747	8.35031e-06	0.000179706
Slc36a1	-0.796788	8.35033e-06	0.000179706
Prkd3	-0.823477	8.27909e-06	0.000179706
Stat3	1.07209	8.4314e-06	0.000180503
Daxx	0.795202	8.40845e-06	0.000180503
Pold3	0.71078	8.4353e-06	0.000180503
Tnip1	1.00927	8.46326e-06	0.000180516
Aifm2	-0.640584	8.46617e-06	0.000180516
Nenf	-0.805019	8.60412e-06	0.00018313
Rxrb	-0.630011	8.83643e-06	0.000187739
Mcat	-0.66371	8.86708e-06	0.000188055
Fgd6	-0.923561	8.96201e-06	0.00018973
Rragd	-0.720461	9.02402e-06	0.000190704
Gngt2	-0.810921	9.09502e-06	0.000191865
Acad10	-0.683281	9.35614e-06	0.000197025
Lipn	-0.928124	9.46666e-06	0.000199
Mamdc2	-0.888618	9.61973e-06	0.000201862
Dctn3	-0.810667	9.66615e-06	0.00020248
Glrx	0.861461	9.84383e-06	0.000205192
Slc8a1	-0.69472	9.81449e-06	0.000205192
Pfn2	-1.02112	9.8473e-06	0.000205192
Rab6	0.738932	1.00595e-05	0.000208884
Hsd17b11	-0.784136	1.00512e-05	0.000208884
Mxd4	-0.753047	1.01154e-05	0.000209679
Gpnmb	-2.88552	1.01992e-05	0.000211048
Gtse1	-0.833577	1.04965e-05	0.000216825
2810004N20Rik	-0.636649	1.05173e-05	0.000216878
Frat2	-0.917793	1.06516e-05	0.000219269
Spsb4	-0.972576	1.07546e-05	0.000221006
Akap10	0.642233	1.09806e-05	0.000225263
Arid4b	0.788514	1.11038e-05	0.000227399
LOC100047167	-0.628597	1.12774e-05	0.000230163
Tfrc	-0.786836	1.12646e-05	0.000230163
Scarf2	-0.724185	1.13449e-05	0.000231145
Gnptab	-0.745191	1.13738e-05	0.000231339
Arhgap30	0.973947	1.15795e-05	0.00023512
Rshl2a	-0.849892	1.16328e-05	0.000235802
Hdhd2	-0.642147	1.17811e-05	0.000238403
Itga6	0.981313	1.19624e-05	0.000241289
Hspb6	-0.678635	1.19643e-05	0.000241289
D9Ertd392e	-0.813109	1.2e-05	0.000241602
Tfb2m	-0.671231	1.20396e-05	0.000241991
Dnmt3b	-0.771845	1.21588e-05	0.000243974
Arap1	-0.702661	1.23372e-05	0.000247139
Ptk2	-0.676273	1.24368e-05	0.000248716
AW548124	-1.33001	1.25995e-05	0.000251546
BC003281	0.958678	1.2652e-05	0.000252173
6720458F09Rik	0.662686	1.27782e-05	0.000254264
Tmem50b	-0.678192	1.28539e-05	0.000255342
B3gnt3	-0.685937	1.29892e-05	0.0002576
Selplg	-0.706819	1.3213e-05	0.00026121
Scp2	-0.749001	1.3215e-05	0.00026121
Lrig3	-1.01776	1.33006e-05	0.000262467
Mgmt	-0.642098	1.33908e-05	0.000263811
Fert2	0.659752	1.34195e-05	0.000263939
Tpst1	0.722099	1.34571e-05	0.000264243
Kctd12	0.908168	1.36333e-05	0.000267263
Amdhd2	-0.768329	1.38856e-05	0.00027176
Prkcb	0.790593	1.40067e-05	0.000273396
Sirpb1	0.754175	1.40157e-05	0.000273396
Pros1	-0.67683	1.4038e-05	0.000273396
1110032A13Rik	0.621717	1.40827e-05	0.00027382
2410066E13Rik	-0.655114	1.4211e-05	0.000275865
Wipi1	-0.695935	1.42522e-05	0.000276216
Il1b	1.40046	1.46473e-05	0.000281521
Rnase6	1.31086	1.45758e-05	0.000281521
Asns	0.958748	1.46917e-05	0.000281521
Rbmx	0.818026	1.4642e-05	0.000281521
Nucb1	-0.643747	1.46961e-05	0.000281521
2210010L05Rik	-0.789482	1.46257e-05	0.000281521
Fam168a	-0.845239	1.4715e-05	0.000281521
H2-Q7	-1.05239	1.4662e-05	0.000281521
Mlkl	1.13013	1.49426e-05	0.000285163
LOC100048556	0.90776	1.49571e-05	0.000285163
Matk	-0.94558	1.49771e-05	0.000285163
Ctsf	-1.04613	1.51154e-05	0.000287337
Itpr3	0.826608	1.52169e-05	0.000288806
Klf4	-0.639205	1.52627e-05	0.000288894
Tspan17	-0.806164	1.527e-05	0.000288894
Rpl7l1	0.864349	1.53127e-05	0.000289243
Marco	1.22685	1.5355e-05	0.000289583
Slc9a3r2	-0.740411	1.54453e-05	0.000290825
Jmjd1a	0.823344	1.58082e-05	0.000297188
Birc2	0.589112	1.59403e-05	0.0002992
Epsti1	0.63028	1.59938e-05	0.000299311
Hrsp12	-0.829552	1.59964e-05	0.000299311
Pign	-0.770212	1.60605e-05	0.000300039
Ankrd40	-0.725533	1.64696e-05	0.0003072
Cdkn2c	-0.646684	1.65126e-05	0.000307521
Dync2li1	0.71916	1.66047e-05	0.000308755
Ddit3	1.05205	1.66662e-05	0.000309415
Emr1	0.94713	1.67026e-05	0.000309608
Foxj3	0.74303	1.6745e-05	0.000309912
Ddx58	0.789232	1.68715e-05	0.000311769
Scamp1	-0.600983	1.69413e-05	0.000312574
Parp14	0.78028	1.7022e-05	0.000313579
Ttc3	-0.808897	1.70979e-05	0.000314491
Fli1	-0.773892	1.71641e-05	0.000315221
Abhd14b	-0.636124	1.72416e-05	0.000315671
Mpv17l	-0.780469	1.72379e-05	0.000315671
Neo1	1.01096	1.73083e-05	0.000316408
Zmat3	-0.810241	1.75366e-05	0.00032009
Pftk1	0.805526	1.76469e-05	0.000321252
Capn5	0.708783	1.76542e-05	0.000321252
Pparg	-0.816696	1.78172e-05	0.000323725
Atp6v0b	-0.668885	1.79212e-05	0.000325119
Syn1	-0.63951	1.80064e-05	0.000326167
Ifnar2	0.820065	1.82439e-05	0.000329969
St3gal5	-1.0259	1.83095e-05	0.000330653
Ctse	0.733944	1.86466e-05	0.000336232
Mpv17l	-0.903371	1.87961e-05	0.000338415
Prdx1	0.615046	1.91268e-05	0.000341787
Tmem51	0.576946	1.91025e-05	0.000341787
Tnnc1	-0.59703	1.90819e-05	0.000341787
Nedd9	-0.734743	1.90221e-05	0.000341787
Zfp277	-0.788884	1.9112e-05	0.000341787
Sbk	-0.718114	1.93051e-05	0.000344458
Apbb1ip	0.82757	1.93361e-05	0.000344495
1190007F08Rik	-0.929943	1.94321e-05	0.000345688
Rell1	-0.683786	1.9517e-05	0.000346681
Rtn1	0.802291	1.95598e-05	0.000346925
Clspn	-0.840574	1.97948e-05	0.000350571
1200016D23Rik	-0.6537	1.98718e-05	0.000351413
Pmp22	-0.64135	2.04659e-05	0.000361382
Tspo	0.670102	2.07687e-05	0.000366186
Gstm2	-1.03082	2.0922e-05	0.000368345
Coro2a	0.73545	2.09558e-05	0.000368395
Arap1	-0.609539	2.13239e-05	0.000374314
Gstm5	-0.719223	2.15918e-05	0.000378459
LOC100045780	-0.857404	2.16796e-05	0.000379441
Orc5l	-0.548647	2.18236e-05	0.000381016
Ciita	-1.27558	2.18335e-05	0.000381016
Il3ra	0.862465	2.22283e-05	0.000387338
Eng	-0.758711	2.22844e-05	0.000387748
Ryr1	-1.09654	2.24537e-05	0.000390125
LOC100044204	-0.705207	2.25346e-05	0.00039096
Vldlr	0.577559	2.25827e-05	0.000391226
Snip1	0.688188	2.33154e-05	0.000403332
Traf3	0.626568	2.3377e-05	0.000403813
Ahnak	-0.573369	2.36931e-05	0.00040868
Mmp9	-0.62876	2.37723e-05	0.000409453
Dbf4	0.678503	2.384e-05	0.000410028
Rrm2	-0.974995	2.4014e-05	0.000412425
Hsf4	-0.745764	2.47962e-05	0.000425246
Tmed4	0.68463	2.53556e-05	0.000432351
Foxj3	0.671396	2.5354e-05	0.000432351
Mical1	-0.704465	2.53551e-05	0.000432351
Add3	-0.746178	2.52826e-05	0.000432351
Sesn2	0.701378	2.55188e-05	0.000433274
Syn1	-0.635341	2.55034e-05	0.000433274
Zfp704	-0.957934	2.54687e-05	0.000433274
Als2cr4	-0.624202	2.58776e-05	0.000438741
Kif3c	0.62675	2.61588e-05	0.000442879
S100a11	-0.603069	2.68415e-05	0.000453792
Ambp	-1.00406	2.68962e-05	0.000454073
AW146242	-0.642558	2.69871e-05	0.000454964
Camk1	-0.661561	2.71708e-05	0.000457414
Adar	0.6387	2.72519e-05	0.000458133
Dyrk1b	-0.607367	2.75992e-05	0.000463317
Isy1	0.650545	2.77702e-05	0.000465532
Hvcn1	-0.610263	2.78777e-05	0.000466677
Sfxn5	0.891902	2.81797e-05	0.000470411
Smpdl3b	0.854839	2.81745e-05	0.000470411
Cenpa	-0.879592	2.8239e-05	0.000470742
Gstt3	-0.73671	2.83018e-05	0.00047113
LOC100047353	-0.670009	2.8658e-05	0.000476395
Gpr85	0.878727	2.89345e-05	0.000479652
Zfp97	0.841893	2.89299e-05	0.000479652
Sh3pxd2b	0.597687	2.90091e-05	0.000479859
BC025076	0.587829	2.90537e-05	0.000479859
Dbp	-0.715615	2.90678e-05	0.000479859
Lbx2	-0.810513	2.95193e-05	0.00048664
Car5b	-0.940381	2.9598e-05	0.000487263
Zfp69	0.881289	2.98011e-05	0.00048993
Itpr2	0.750865	3.02826e-05	0.000497161
Naprt1	-0.606113	3.12996e-05	0.000513149
Ttyh2	-0.699343	3.19686e-05	0.000523397
Hrmt1l2	0.562616	3.20469e-05	0.00052396
Alg9	-0.911655	3.20955e-05	0.000524036
Irgm1	0.652137	3.21723e-05	0.000524571
Syp	-0.693231	3.29023e-05	0.00053501
Car5b	-0.810679	3.28741e-05	0.00053501
Epsti1	0.817989	3.38844e-05	0.000550229
Abi3	0.78519	3.42101e-05	0.000554763
Fabp5	-0.963425	3.42589e-05	0.000554799
Gabarapl1	-0.591494	3.43364e-05	0.0005553
Fchsd2	-0.653559	3.44494e-05	0.000556372
Luzp1	0.659458	3.51345e-05	0.000566668
Traf3	0.639979	3.52698e-05	0.000567315
Acox3	-0.680822	3.5233e-05	0.000567315
Tmem41a	-0.602204	3.55166e-05	0.000570468
Mif4gd	-0.616013	3.55615e-05	0.000570468
Serpinb6a	-0.552307	3.56164e-05	0.00057058
Mgll	-1.5034	3.58622e-05	0.000573748
Pigt	0.691308	3.59918e-05	0.000575048
Fabp3	-0.739025	3.64133e-05	0.000581004
2700038C09Rik	0.63472	3.70862e-05	0.00059095
Cd83	-0.832632	3.78392e-05	0.000602144
Amdhd2	-0.635408	3.80343e-05	0.000604441
Gpr162	-0.767862	3.82035e-05	0.000606322
Gm1673	-0.645979	3.84227e-05	0.00060899
Cib2	-0.646273	3.88739e-05	0.000615323
9030625A04Rik	0.575355	3.89818e-05	0.000616213
Abcb8	0.561858	3.91113e-05	0.00061744
2310047M10Rik	-0.643252	3.91873e-05	0.000617822
Vps39	-0.601672	3.92989e-05	0.000618763
2310044G17Rik	-0.614362	3.96654e-05	0.000623709
Vat1	-0.791726	3.98042e-05	0.000625068
Idh1	-0.532055	3.98773e-05	0.000625391
Vegfc	0.8113	4.05372e-05	0.000634905
Abhd4	-0.642309	4.06378e-05	0.000635645
Cd14	0.588338	4.10027e-05	0.000640513
Suv420h2	-0.582162	4.14162e-05	0.000646126
Parp1	-0.694892	4.21072e-05	0.000656046
Scoc	0.732042	4.2166e-05	0.000656105
Fgfr1op2	-0.703356	4.22856e-05	0.000657109
Naip5	0.6015	4.27164e-05	0.000662939
Vangl2	-0.504247	4.3049e-05	0.000667231
Cdc2l6	0.56919	4.31507e-05	0.00066784
Ttc3	-0.822707	4.32003e-05	0.00066784
Katnal1	-0.936602	4.32939e-05	0.00066842
Ube2e2	0.562868	4.33616e-05	0.000668599
Cchcr1	0.778669	4.39702e-05	0.000677107
Tsen2	-0.665755	4.42177e-05	0.000680039
Efcab4a	-0.749606	4.47665e-05	0.000687593
Ly86	0.606971	4.49647e-05	0.000688966
Hsd17b11	-0.86317	4.49715e-05	0.000688966
Gm2a	-0.558531	4.52357e-05	0.000691236
Rbms2	-0.602732	4.52257e-05	0.000691236
Nme4	0.670539	4.56331e-05	0.000695666
Gpr162	-0.874462	4.56423e-05	0.000695666
Cd9	-0.641052	4.62014e-05	0.000703288
Nol1	0.506965	4.68999e-05	0.00071301
Ankle2	0.605958	4.7273e-05	0.000715943
Unc119b	-0.683319	4.71567e-05	0.000715943
Ltbp3	-0.744492	4.72242e-05	0.000715943
Scoc	-0.582613	4.73945e-05	0.000716872
Trpv4	-0.858295	4.75325e-05	0.000718048
Atp6v0d1	-0.56346	4.7925e-05	0.00072306
Chchd10	-0.567159	4.84209e-05	0.000728881
Rbpms	-0.824055	4.84331e-05	0.000728881
Nlrx1	0.584577	4.85909e-05	0.000730334
Gstp1	-0.54724	4.89235e-05	0.000734406
Hrsp12	-0.639554	4.92446e-05	0.000738298
Ctnnd2	1.61716	4.9459e-05	0.000740232
Shmt2	0.816297	4.94978e-05	0.000740232
Ncf2	0.670286	4.97615e-05	0.000742704
Cldn11	-0.814777	4.97878e-05	0.000742704
Adar	0.671455	5.00341e-05	0.000745445
LOC100047800	0.549207	5.03032e-05	0.000748518
Tspo	0.721723	5.05051e-05	0.000749652
Gsta3	-1.26828	5.04533e-05	0.000749652
Eif2ak1	-0.508534	5.07755e-05	0.000752728
Rgl2	-0.692136	5.11086e-05	0.000756724
Pdgfb	-0.6924	5.20869e-05	0.000770254
1700047I17Rik1	-1.00115	5.24194e-05	0.000774209
Oasl2	0.612102	5.32883e-05	0.000786068
Prps1	-0.857785	5.33721e-05	0.000786331
Med1	0.759679	5.35562e-05	0.00078807
Acpp	-0.659067	5.40164e-05	0.000793861
Smyd5	0.628438	5.44083e-05	0.000798637
Gpr84	1.19787	5.45724e-05	0.000800059
Gas6	-0.762236	5.47248e-05	0.000801308
Parp8	0.775899	5.48912e-05	0.000802759
Agrn	0.59271	5.50391e-05	0.000802952
2410022L05Rik	-0.525257	5.50263e-05	0.000802952
Rhoc	-0.893069	5.54286e-05	0.000807645
Gdpd1	-0.542253	5.55237e-05	0.000808043
Cd300lb	-0.592528	5.61498e-05	0.000815596
Slc44a1	-0.640204	5.61796e-05	0.000815596
Galnt2	1.21806	5.66491e-05	0.000821412
H2-DMb2	0.739408	5.74648e-05	0.000832227
Hrsp12	-0.638918	5.81051e-05	0.00083946
BC004044	-0.814918	5.80663e-05	0.00083946
Csrp2	-0.731773	5.92934e-05	0.000855591
Cdc45l	-0.555654	5.99787e-05	0.000864433
Xylt2	0.598086	6.1071e-05	0.000879112
Dis3l	0.5267	6.13018e-05	0.000881371
Ets2	0.62488	6.16352e-05	0.000885097
Batf	0.511668	6.18893e-05	0.000887032
Kremen	-0.667981	6.19188e-05	0.000887032
Fert2	0.873598	6.24952e-05	0.000894214
Rsph1	-0.745703	6.26974e-05	0.000896031
2310045A20Rik	-0.918735	6.30182e-05	0.000899538
Arl4c	-0.699812	6.32889e-05	0.000902321
Necap2	-0.559982	6.34707e-05	0.000902753
Magee1	-0.696074	6.34004e-05	0.000902753
EG665378	0.608232	6.36459e-05	0.000904167
D630023F18Rik	-0.741185	6.38301e-05	0.000905704
Fam102a	0.839989	6.44109e-05	0.000911774
Aprt	-0.588147	6.43797e-05	0.000911774
Slc9a1	-0.54654	6.45027e-05	0.000911989
Pcyt1a	-0.568413	6.5238e-05	0.000919115
Rora	-0.611571	6.51961e-05	0.000919115
Ugt1a6a	-0.654453	6.52126e-05	0.000919115
Ifnar2	0.719162	6.53612e-05	0.000919764
Wipi1	-0.579744	6.5681e-05	0.000922087
Peli2	-0.588019	6.56176e-05	0.000922087
LOC100047214	-0.709774	6.7016e-05	0.000939722
Calml4	0.887986	6.75538e-05	0.000944167
Hyi	0.73682	6.76037e-05	0.000944167
Aldh2	0.533284	6.74902e-05	0.000944167
Ethe1	-0.52012	6.76499e-05	0.000944167
Usp18	0.946146	6.83294e-05	0.000952536
Zfyve21	-0.506106	6.85163e-05	0.000954025
Sqle	0.917965	6.87812e-05	0.000956597
Gm1673	-0.546064	6.90534e-05	0.000958146
Nagk	-0.622821	6.90137e-05	0.000958146
Txnl4	-0.642661	7.04259e-05	0.000976054
Hectd2	0.576662	7.09725e-05	0.000982486
Lrp4	-0.779651	7.11503e-05	0.000983805
Bmp1	0.897612	7.18033e-05	0.000990536
Agpat4	-0.652232	7.17228e-05	0.000990536
Ccdc46	-0.753659	7.20877e-05	0.00099331
Vwf	-0.771844	7.29751e-05	0.00100438
Zeb1	0.731711	7.44969e-05	0.00102138
Mif4gd	-0.600553	7.4639e-05	0.00102138
Unc5b	-0.617068	7.46311e-05	0.00102138
Rftn2	-0.657442	7.44079e-05	0.00102138
Nucb1	-0.662439	7.43652e-05	0.00102138
Cysltr1	0.589862	7.47369e-05	0.00102155
Macrod1	-0.659436	7.53188e-05	0.00102715
Bcl2l11	-0.909075	7.52699e-05	0.00102715
Tlr1	-0.737534	7.55321e-05	0.00102888
Ndufaf1	0.595711	7.58152e-05	0.00103155
Tpmt	0.817624	7.6245e-05	0.00103386
Trex1	0.623706	7.60952e-05	0.00103386
Ttc3	-0.729339	7.61981e-05	0.00103386
Dstn	-0.733266	7.65346e-05	0.00103661
Ltc4s	-1.10973	7.70155e-05	0.00104194
Entpd5	-0.582318	7.72259e-05	0.0010436
Pigp	-0.531933	7.86948e-05	0.00106225
Gab2	-0.633234	7.89693e-05	0.00106475
Prdx5	-0.731161	7.97689e-05	0.00107431
Tmem42	0.630648	8.02844e-05	0.00108003
Lxn	-0.536057	8.05372e-05	0.00108221
Ehbp1l1	0.605946	8.08571e-05	0.00108529
Serpinb12	-0.742201	8.14447e-05	0.00109194
Plk1	-0.675387	8.18795e-05	0.00109654
Gpr65	0.923	8.34229e-05	0.00111596
Dap3	-0.469702	8.40359e-05	0.0011229
Gpx1	-0.499214	8.43236e-05	0.00112501
B930037P14Rik	-0.74525	8.43832e-05	0.00112501
4930599N23Rik	0.700943	8.47221e-05	0.00112701
Csrnp2	-0.508879	8.4719e-05	0.00112701
Itgb1bp1	-0.536976	8.50555e-05	0.00112894
Dusp1	-0.953616	8.50566e-05	0.00112894
Hs6st1	0.504271	8.61987e-05	0.00114283
Nedd9	-0.625057	8.74038e-05	0.00115734
Rfx2	-0.910441	8.74876e-05	0.00115734
Qdpr	-0.589656	8.76182e-05	0.00115778
Fyb	0.553878	8.7877e-05	0.00115992
Nrcam	-0.646217	8.85255e-05	0.00116718
Slc6a8	-0.604582	8.91093e-05	0.00117358
Dedd2	-0.982355	8.96277e-05	0.00117911
Mreg	-0.885166	8.98983e-05	0.00118136
Kctd10	-0.612567	9.01079e-05	0.00118227
Iqgap2	-0.849993	9.01653e-05	0.00118227
2310002B06Rik	-0.747817	9.04388e-05	0.00118455
Dgka	-0.659111	9.0991e-05	0.00118917
Cdca2	-0.722377	9.0965e-05	0.00118917
Clic6	-0.721564	9.111e-05	0.00118942
Rrbp1	0.63395	9.14901e-05	0.00119307
Hsd17b7	0.697168	9.17772e-05	0.00119551
Enpp2	1.203	9.1934e-05	0.00119625
Atp6v0a2	0.52914	9.20691e-05	0.0011967
Far1	-0.754728	9.24593e-05	0.00120046
5330431N19Rik	-0.496171	9.28903e-05	0.00120474
Irf5	0.546441	9.33773e-05	0.00120968
Krt10	-0.514016	9.34741e-05	0.00120968
Eif4g2	0.507164	9.43878e-05	0.00121911
BB128963	-0.571619	9.4407e-05	0.00121911
Prmt3	0.596443	9.4759e-05	0.00122101
Cdkl2	-0.673723	9.46585e-05	0.00122101
Cd274	0.543675	9.57959e-05	0.00123304
Enc1	-0.662365	9.63242e-05	0.00123716
Fkbp9	-0.982003	9.6221e-05	0.00123716
V1rd6	1.05866	9.71623e-05	0.00124659
Hyal2	-0.538039	9.73695e-05	0.00124667
Hes6	-0.609954	9.7378e-05	0.00124667
Prosapip1	-0.512691	9.75299e-05	0.00124727
Snx2	0.706336	9.78698e-05	0.00125028
Bbx	0.53511	9.81985e-05	0.00125313
Lepre1	-0.622815	9.86417e-05	0.00125744
Rapsn	-0.669392	9.93506e-05	0.00126513
Nudt19	-0.566045	0.000100056	0.00127275
Glt25d1	-0.566546	0.000100438	0.00127624
Tsc22d2	0.550343	0.000102353	0.00129884
Kif23	-0.535084	0.000102434	0.00129884
Trpv2	-0.578231	0.000103111	0.00130604
Sgms2	-0.731581	0.000103333	0.00130745
Mod1	-0.720477	0.000103459	0.00130767
Vegfb	-0.661267	0.000103624	0.00130836
Acp2	0.509795	0.000103739	0.00130843
Pols	0.495673	0.000104136	0.00131014
Tsc22d4	0.494027	0.000104128	0.00131014
Dtnbp1	-0.574185	0.000104205	0.00131014
Upp1	0.631301	0.000104698	0.00131358
Paip2b	-0.454188	0.000104626	0.00131358
Creld1	-0.517348	0.000106126	0.00133009
Cdkn2c	-0.529811	0.000106375	0.00133182
Ndc80	-0.69291	0.000107161	0.00134024
Trafd1	0.684786	0.000107915	0.00134684
Gtf2ird1	-0.545713	0.000107831	0.00134684
Uck2	-1.01397	0.000109508	0.0013653
Ddost	0.476762	0.000109772	0.00136716
Pitpnc1	0.890714	0.000110303	0.00137234
Rbpms	-0.842165	0.000110564	0.00137415
Samd11	-0.575783	0.000111053	0.00137879
Ppic	0.78614	0.000111666	0.00138496
Pdxdc1	0.929397	0.000112241	0.0013903
2610103J23Rik	-0.506623	0.00011233	0.0013903
Cbr2	-0.553436	0.000112554	0.00139163
Slc25a10	0.642286	0.000113055	0.00139638
1500012F01Rik	0.610861	0.000114366	0.0014111
Rrp9	0.507737	0.000115025	0.00141777
Plscr1	0.444406	0.000115252	0.0014191
Lrrc8	0.525074	0.00011616	0.00142734
Gramd3	-0.7415	0.000116071	0.00142734
Npm3	0.474819	0.000117049	0.00143677
Sfpi1	0.599737	0.000117651	0.00143839
1110032A13Rik	0.578374	0.000117728	0.00143839
Gpr34	-0.597397	0.000117438	0.00143839
Wbp5	-0.628951	0.0001175	0.00143839
Serpinb8	-0.733782	0.000117784	0.00143839
Tmem82	0.624631	0.000118404	0.00144448
Casp4	0.571162	0.00011912	0.00145156
Fcna	-0.849047	0.000119228	0.00145156
Cd164	0.581455	0.00011952	0.00145363
Vav1	0.506827	0.000120873	0.00146858
Ccdc41	0.477993	0.000121403	0.00147352
Sepw1	0.540523	0.000121527	0.00147353
Gbp3	0.868065	0.000123814	0.00149973
Tmem49	0.630598	0.000124341	0.00150307
Ptplad2	0.625549	0.000124267	0.00150307
Tceb1	0.647185	0.000125582	0.00151346
Xdh	-0.5579	0.000125568	0.00151346
Sts	-0.710571	0.000125535	0.00151346
S100a13	-0.627031	0.000126252	0.00151999
Irf7	1.01428	0.000126946	0.00152681
Cyhr1	-0.453788	0.000127235	0.00152874
Fpr1	0.799163	0.000127799	0.00153397
Ndor1	0.544396	0.000127952	0.00153399
Arhgap24	-0.968771	0.000128057	0.00153399
Dock8	0.606606	0.000128559	0.00153771
Dci	-0.504219	0.000128626	0.00153771
Ass1	0.730724	0.000129881	0.00155018
1700047I17Rik1	-0.789439	0.000129929	0.00155018
A2bp1	1.2081	0.000130393	0.00155415
Bahcc1	-0.455695	0.000131023	0.0015601
Cdca3	-0.921533	0.000131411	0.00156316
EG433016	0.843973	0.000131966	0.00156562
Gsto1	-0.665903	0.000131983	0.00156562
Stac2	-0.713952	0.000132011	0.00156562
Cdt1	-0.677576	0.000133995	0.00158756
Sfrs3	0.584935	0.000134135	0.00158765
Pold1	0.66744	0.00013488	0.00159368
Eif4e2	-0.607313	0.00013518	0.00159368
Scd1	-0.789603	0.000135118	0.00159368
Mcf2l	-0.80681	0.000135075	0.00159368
Hemk1	-0.660362	0.000135705	0.00159829
Csde1	0.45717	0.000136104	0.00160141
Yipf6	0.551876	0.000139477	0.00163695
Vim	-0.589584	0.000139351	0.00163695
Lzts2	-0.963041	0.000139537	0.00163695
Lhfpl2	-0.664427	0.00014147	0.001658
Nsmaf	0.548626	0.000141759	0.00165975
Gnpda1	-0.585408	0.000142707	0.00166921
F5	0.975784	0.000143257	0.001674
Slc39a13	0.685112	0.000144519	0.00168709
AW555464	-0.525957	0.000145263	0.00169412
Mrpl14	-0.600603	0.000145462	0.00169478
Slc12a9	0.490558	0.000146684	0.00170569
Myo7a	-0.651182	0.000146618	0.00170569
Ube1l	0.540279	0.000147334	0.00171158
Elmo2	-0.739525	0.000147815	0.00171548
Arhgap27	0.849282	0.000148376	0.00171765
1110008P14Rik	-0.532828	0.000148433	0.00171765
Sgsm3	-0.568293	0.00014837	0.00171765
4933426M11Rik	0.555442	0.000150838	0.00174209
2310022B05Rik	-0.664672	0.000150824	0.00174209
1700027N10Rik	-0.599371	0.000151489	0.00174684
Trim36	-0.658783	0.000151542	0.00174684
H2-Ea	0.817801	0.000151884	0.00174908
LOC100045567	0.608293	0.000153178	0.00176229
Capn10	-0.589811	0.000153526	0.00176459
Fam134b	0.705892	0.000154161	0.00176853
Stt3a	0.604433	0.000154166	0.00176853
Mettl1	0.643149	0.000154921	0.00177378
Os9	-0.492672	0.000154813	0.00177378
Cd63	-0.601503	0.00015613	0.0017859
Hspa9	0.461752	0.000156445	0.00178779
Iqgap3	-0.570648	0.00015704	0.00179287
Brp16	0.502451	0.00015768	0.00179846
Car5b	-0.784736	0.00015819	0.00180255
Bcl7a	-0.977186	0.000159261	0.00181302
Eef2k	-0.719413	0.000159881	0.00181834
Nuak1	-0.785921	0.000160179	0.00182
3000004C01Rik	-0.531782	0.000161042	0.00182806
Snx2	0.767172	0.000161746	0.00183389
Tle1	0.624072	0.000162017	0.00183389
LOC676420	-0.523506	0.000161907	0.00183389
Dtx2	0.505643	0.000162289	0.00183522
Dock4	0.559243	0.000162754	0.00183873
Arrb2	0.497475	0.000164043	0.00185154
Nqo1	-0.957098	0.000164697	0.00185716
Klc4	-0.488379	0.000164996	0.00185878
Tpra40	-0.508093	0.000166311	0.00187182
Cova1	0.707984	0.000166736	0.00187484
Rrad	0.546555	0.000167289	0.00187928
Ctdsp2	-0.525657	0.000168526	0.00189139
Ids	0.554397	0.00016902	0.00189516
Golm1	0.485281	0.000169391	0.00189753
9130211I03Rik	-0.464047	0.000172421	0.00192965
Klhl21	-0.572252	0.000173224	0.00193501
Fam132a	-0.589783	0.000173153	0.00193501
Tef	-0.515953	0.000173845	0.00194013
Slc29a1	-0.563064	0.000174305	0.00194345
Atp6v0d1	-0.621391	0.00017546	0.0019545
Aatf	0.577568	0.00017704	0.00197026
Ryr1	-0.554791	0.000177221	0.00197043
Pmm2	0.491344	0.000178036	0.00197764
Slk	-0.536198	0.000178425	0.00198012
Ets1	0.798934	0.000181179	0.00200881
BC016495	-0.508253	0.000182477	0.00202132
Ccdc125	-0.669214	0.000183244	0.00202793
Nrp1	0.600262	0.000187673	0.0020731
Kif4	-0.659524	0.000187594	0.0020731
Golga2	-0.608016	0.000188861	0.00208429
Tspan32	-0.554595	0.000189338	0.00208762
Sh3bp1	0.615048	0.000190558	0.00209913
Tnfaip1	-0.524025	0.000191034	0.0021005
LOC100048461	-0.582592	0.000190958	0.0021005
B4galt3	0.625412	0.000192445	0.00211003
Pmm1	-0.480029	0.00019261	0.00211003
Gab1	-0.523974	0.00019252	0.00211003
Serf1	-0.636975	0.000192588	0.00211003
Smox	-0.737478	0.000192806	0.00211024
Tnfsf14	-0.732804	0.000193096	0.00211148
Rasgrp3	-0.889161	0.00019379	0.00211712
scl0003251.1_21	-0.670963	0.000197776	0.00215869
Gdpd5	-0.643744	0.000198783	0.0021677
Rnase4	-0.520905	0.000200134	0.00217646
Hpse	-0.643176	0.000200127	0.00217646
Sh3bgrl2	-0.731806	0.000200025	0.00217646
Timp2	-0.53634	0.000202086	0.00219568
Fcho1	-0.570912	0.000203011	0.00220372
Arhgef18	0.754095	0.000204367	0.0022124
Ifngr1	-0.557494	0.000204143	0.0022124
S100a4	-0.921619	0.000204261	0.0022124
Arl6ip1	-0.420565	0.000204781	0.00221487
Lgals3	-0.487258	0.000205747	0.0022233
Tmem209	0.546971	0.000206388	0.0022282
Rap2a	-0.498513	0.000208438	0.0022483
Clspn	-0.686397	0.000209358	0.00225619
Gna12	0.558676	0.000212024	0.00227933
Wnk1	0.519852	0.000211867	0.00227933
Rxra	-0.62699	0.00021208	0.00227933
BC066107	0.638693	0.00021367	0.00229436
Mib2	-0.462746	0.000214113	0.00229704
Pqlc3	-0.499252	0.000214724	0.00230153
Sdhb	0.530639	0.000215117	0.00230207
Pscd3	-0.507471	0.000215161	0.00230207
Snapin	-0.471315	0.00021604	0.0023094
Rnf19a	-0.447387	0.000217625	0.00232425
Aqr	0.555678	0.000218333	0.00232973
Cd63	-0.542615	0.000219111	0.00233594
Ugt1a6a	0.790618	0.000219901	0.00234223
LOC100048796	-0.678079	0.000220094	0.00234223
Fbxo21	-0.501585	0.000220671	0.00234628
Mettl8	0.654178	0.000221762	0.00234949
Nmral1	0.48784	0.000221291	0.00234949
P2ry14	-0.465849	0.000221687	0.00234949
Bbs9	-0.617355	0.000221579	0.00234949
Socs6	-0.659966	0.000222531	0.00235555
St6galnac4	-0.606723	0.000222901	0.00235737
Sdc4	0.561344	0.000226083	0.0023889
Tmem167	0.441527	0.000227553	0.0024023
Ada	-0.692785	0.000228507	0.00241024
Mtus1	-0.569826	0.000229564	0.00241925
Iqgap1	0.586295	0.000232307	0.00244383
OTTMUSG00000016703	-0.798663	0.000232194	0.00244383
Snx25	-0.487274	0.000233474	0.00245394
Suclg2	0.453272	0.000234963	0.00246742
2610003J06Rik	-0.468713	0.000236589	0.00248027
Lyst	-0.564749	0.000236602	0.00248027
Tdrkh	-0.839646	0.000238276	0.00249562
Hps3	0.553516	0.000239814	0.00250952
Tnfaip3	0.512705	0.000240465	0.00251412
Hdac4	-0.897052	0.000240985	0.00251735
Oas2	0.591988	0.000242475	0.00252719
Nudt5	0.481013	0.000242563	0.00252719
Pdgfa	-0.61926	0.000242253	0.00252719
Pacrg	-0.947008	0.000243433	0.00253404
Stard7	0.43507	0.000244007	0.0025378
E330036I19Rik	-0.605763	0.000246133	0.00255768
Hist1h1c	-0.527088	0.000247164	0.00256615
Atp6v0d1	-0.479377	0.000249946	0.00259278
E130016E03Rik	-0.545645	0.000252063	0.00261247
Morc3	0.458427	0.00025237	0.00261338
Nhedc2	1.40198	0.000253908	0.00262247
Zmym3	0.619664	0.00025385	0.00262247
Zfp131	-0.543381	0.000253877	0.00262247
Cd47	0.42413	0.000255128	0.00263051
Map3k12	-0.601272	0.000255077	0.00263051
Arid3b	0.54552	0.000255376	0.00263079
LOC100046232	0.534855	0.000256134	0.00263632
Snx33	-0.469156	0.000257847	0.00265166
Lat2	-0.640233	0.000260065	0.00267217
Ifnar2	0.558214	0.000260882	0.00267825
Tmem86a	-0.451468	0.000262055	0.00268567
Fbxo32	-0.716976	0.000262028	0.00268567
Npm3	0.673224	0.000263722	0.00270043
St3gal6	0.692131	0.00026413	0.00270228
Gadd45a	-0.805328	0.000264623	0.00270501
Ptp4a3	0.607976	0.000264866	0.00270517
Alg8	0.75553	0.000269092	0.00274598
Mlp	0.484119	0.000272998	0.00278346
Map4k4	-0.674527	0.000274086	0.00279216
Gyg	-0.596316	0.000274344	0.00279241
Cenpb	-0.553256	0.000274865	0.00279532
Mysm1	0.599788	0.000277213	0.0028168
Actr3	0.504159	0.00027775	0.00281985
Bex4	-0.478421	0.000278981	0.00282993
Slco3a1	0.883188	0.00028019	0.00283978
1190002A17Rik	-0.43482	0.000280732	0.00284285
Mospd3	-0.525606	0.000283179	0.0028652
0610037L13Rik	0.466514	0.000283751	0.00286613
Pqlc3	-0.539321	0.000283622	0.00286613
Btg1	-0.473172	0.000285465	0.002881
Xrn2	0.449843	0.000289173	0.00291348
Tdrd7	0.414424	0.000289018	0.00291348
Slk	-0.632959	0.000292416	0.00294367
Rac2	0.654006	0.000292721	0.00294425
Pim1	0.863956	0.000294555	0.00296021
Utp11l	0.443727	0.000294885	0.00296102
Tm6sf1	-0.489276	0.000295966	0.00296649
Lat2	-0.585551	0.000296176	0.00296649
Agpat5	-0.713152	0.000295973	0.00296649
Hes6	-0.472329	0.000296587	0.00296811
E330018D03Rik	0.543342	0.000296853	0.00296828
9530068E07Rik	-0.463024	0.000297793	0.00297518
Rhob	-0.786235	0.00029832	0.00297795
Htr2b	-0.660801	0.00029938	0.00298603
Ttyh2	-0.78646	0.000301242	0.00300209
5430435G22Rik	-0.462062	0.000301657	0.00300371
Pygl	-0.482914	0.000303443	0.00301646
BC030183	-0.542386	0.0003033	0.00301646
Tal1	0.58314	0.000304433	0.00302126
Nadk	0.458646	0.000304391	0.00302126
Rapsn	-0.543198	0.000305809	0.00303239
Plod1	0.660422	0.000307142	0.00303858
Parp12	0.567296	0.000307198	0.00303858
Ptp4a2	0.402627	0.00030702	0.00303858
Ctps	0.622751	0.000307923	0.00304274
Spire1	-0.536303	0.000308129	0.00304274
Bcl9l	-0.615704	0.000311157	0.0030701
Casp4	0.656913	0.00031226	0.00307841
2310003L22Rik	0.494846	0.000312516	0.00307841
Ly6c1	0.739477	0.000312896	0.00307961
1300018I05Rik	0.449927	0.000313736	0.00308532
1700052N19Rik	-0.437188	0.000314741	0.00309266
E030034P13Rik	0.684232	0.000317462	0.00311683
Pwwp2b	0.590065	0.000318857	0.0031257
Lman2l	0.470121	0.000318891	0.0031257
Map3k1	0.504087	0.000320856	0.00314239
Mef2c	0.491194	0.000322057	0.00315156
C130032J12Rik	-0.455565	0.00032268	0.00315506
Tirap	0.526614	0.000324252	0.00316784
Rab17	-0.909025	0.000324688	0.00316949
Rapsn	-0.520754	0.000327112	0.00319055
Srm	0.632504	0.00032807	0.00319728
Arhgef2	0.54721	0.000328795	0.00319976
Gbp2	0.523662	0.000328862	0.00319976
Rilpl1	-0.660791	0.000329908	0.00320732
1810055E12Rik	0.629786	0.000330999	0.00321324
Lpin1	-0.602708	0.000331198	0.00321324
Rab7	-0.616262	0.000331326	0.00321324
Clec4a1	0.485837	0.000333849	0.00323508
Banf1	0.567148	0.000336209	0.0032553
Plagl2	0.487172	0.000337634	0.00326644
Fzd7	0.600636	0.000338164	0.00326892
Zfp579	-0.497474	0.000338973	0.00327408
LOC667609	0.51185	0.000341644	0.00329619
Dus4l	0.457127	0.000342091	0.00329619
Sema6d	-0.617564	0.00034202	0.00329619
Rbms3	0.642526	0.000346845	0.00333336
Pou2f2	0.615068	0.000346636	0.00333336
Irak2	0.426757	0.000347068	0.00333336
Rab11fip5	-0.474692	0.000347049	0.00333336
Gpr109a	0.7142	0.000347628	0.00333605
Mov10	0.534949	0.000350225	0.00335827
Spp1	-0.580517	0.000353869	0.00338776
Siat9	-0.858709	0.000353632	0.00338776
Bcap29	0.422587	0.000354647	0.00339248
Plac8	0.726916	0.000355542	0.00339832
Elmo1	0.478273	0.000356806	0.00340767
Trim36	-0.505353	0.000358517	0.00342127
1700071K01Rik	0.596218	0.000361062	0.0034428
Slc25a15	-0.458026	0.000363501	0.00346329
Ptdss2	-0.492484	0.000363962	0.0034649
Slc2a6	-0.485868	0.000365428	0.00347609
Stx3	-0.604994	0.000366556	0.00348404
Igf2bp3	-0.438431	0.000367202	0.0034874
Gpr18	0.840831	0.000368622	0.0034981
Limk1	-0.440227	0.00037022	0.00351046
AA408296	0.50986	0.000371791	0.0035201
Sergef	-0.635765	0.000371827	0.0035201
Lmna	-0.565861	0.000372495	0.00352363
Mtus1	-0.580735	0.000375766	0.00355175
Cox18	0.641315	0.000377111	0.00355319
2400006N03Rik	-0.44237	0.000376228	0.00355319
Slain2	-0.503466	0.000376626	0.00355319
1700052N19Rik	-0.507202	0.000376851	0.00355319
Cox5a	0.639737	0.00037908	0.00356843
Ciapin1	0.398189	0.000379327	0.00356843
Pygb	0.410478	0.000379863	0.00357065
Ubtd2	0.455834	0.000381788	0.00358592
Birc2	0.514131	0.000382606	0.00359077
Slc13a2	0.60349	0.000383054	0.00359214
Orc5l	-0.523977	0.000385214	0.00360956
Pqlc3	-0.517877	0.000386066	0.0036147
Npm3-ps1	0.426688	0.000389153	0.00364075
Rad23a	0.81864	0.000390066	0.00364297
Hist1h4f	0.796058	0.000390308	0.00364297
Trib3	0.698856	0.000390238	0.00364297
Arl8b	-0.502908	0.00039261	0.0036616
Tmem2	-0.433787	0.000393242	0.00366462
Il18	0.538079	0.000394642	0.00366907
Cyp51	0.489137	0.000394066	0.00366907
Mmp2	-0.618722	0.000394488	0.00366907
Trp53inp2	-0.53785	0.000396202	0.0036807
Zadh2	-0.5072	0.000398017	0.00369468
Bckdha	-0.431413	0.000398964	0.00370058
Gfra4	1.0417	0.000400356	0.00371061
Prmt7	0.452453	0.000400969	0.0037134
Mbp	-0.451879	0.000401423	0.00371472
Mapk3	-0.632372	0.000402156	0.00371861
Oxct1	-0.485692	0.000402873	0.00372236
Dtx2	0.577748	0.000404025	0.00372663
Serbp1	0.465996	0.000404586	0.00372663
Cib1	-0.467309	0.000404463	0.00372663
ENSMUSG00000043795	-0.581755	0.000404097	0.00372663
Pstpip2	-0.601238	0.000406088	0.00373758
Cyfip1	0.461478	0.000407441	0.00374713
Mras	-0.625711	0.000408663	0.00375547
Pccb	-0.424216	0.000409671	0.00376184
Stk35	-0.675124	0.000411018	0.0037713
Smpd2	-0.605963	0.000413722	0.00379319
Pld3	-0.521983	0.000414546	0.00379783
Aatk	-0.412994	0.00041671	0.00381472
Pdia4	0.539122	0.000417943	0.00382307
Evi2a	0.505099	0.000424422	0.00387936
Epb4.1l1	0.412791	0.000425653	0.00388763
1110058L19Rik	-0.396472	0.000426738	0.00389455
Kat2a	0.685359	0.00043116	0.0039319
Rps27a	0.494756	0.00043442	0.00395558
Srp54	-0.534089	0.00043409	0.00395558
Tubb6	-0.765454	0.000437328	0.00397902
H2afz	-0.434099	0.000438232	0.0039842
4933428G20Rik	-0.492421	0.000438747	0.00398471
Cib2	-0.498446	0.000438956	0.00398471
Alg8	0.487851	0.000439923	0.00399044
Atp6v0d1	-0.452815	0.000442558	0.00400824
Suox	-0.578729	0.000442349	0.00400824
Pacsin2	0.442837	0.000444937	0.00402673
Trex1	0.595968	0.000447795	0.00404928
Abcg1	-0.565525	0.000448108	0.00404928
Cxcr4	-0.679982	0.000448798	0.00405244
Lmna	-0.403596	0.000450287	0.00406281
Casp8	0.45854	0.000450989	0.00406607
Zfp386	0.734384	0.000457631	0.00412283
LOC100045005	-0.443735	0.000458731	0.00412962
Arpp19	0.40175	0.000460235	0.00413691
Spag5	-0.641209	0.000460219	0.00413691
Rnf11	-0.488529	0.000460967	0.00414037
Naprt1	-0.5571	0.00046537	0.00417677
Sgcb	0.465503	0.000465814	0.00417761
Elmo1	0.528155	0.000469718	0.00420945
Rgl2	-0.505298	0.000473345	0.00423705
Sidt2	-0.604809	0.000473509	0.00423705
Ctdspl	-0.79855	0.000478541	0.00427886
Col23a1	-0.586791	0.000479591	0.00428504
Rtn1	0.627566	0.000484252	0.00431375
Adar	0.557035	0.00048383	0.00431375
Uvrag	-0.382807	0.000484113	0.00431375
Lck	-0.503878	0.000483803	0.00431375
Kdelr2	-0.543567	0.000484808	0.00431548
Slc25a33	0.606747	0.000485716	0.00431711
Prkd3	-0.669465	0.00048571	0.00431711
Gipc1	-0.504811	0.000487667	0.00433122
Gip	0.449049	0.000488699	0.0043343
Got2	-0.386825	0.000489104	0.0043343
2310047M10Rik	-0.50939	0.000488863	0.0043343
Ly6e	0.5344	0.00049249	0.00435782
Uap1l1	-0.545399	0.000492172	0.00435782
Pla2g7	-0.534167	0.000494466	0.00437207
Tshz3	0.461292	0.000497409	0.00439483
Pfdn2	0.501512	0.000498099	0.00439766
Mat2b	0.544324	0.000501868	0.00442493
Pgcp	-0.570296	0.000502095	0.00442493
Olfm1	-0.594995	0.000502302	0.00442493
Rab11fip5	-0.395477	0.00050405	0.00443705
Snx5	-0.572853	0.000504484	0.0044376
Syngr1	-0.546087	0.000505972	0.0044474
Sla	0.821141	0.000507636	0.00445874
Tspo	0.504769	0.000508514	0.00446167
Myd116	-0.473528	0.000508718	0.00446167
Gdf15	0.714684	0.000509419	0.00446454
Btrc	-0.482757	0.000510346	0.00446937
Spc25	-0.577093	0.000512715	0.00448682
Riok1	0.41716	0.00052082	0.0045544
Ssbp2	-0.622716	0.00052153	0.00455727
Anxa3	-0.451102	0.000522812	0.00456513
Dlg4	-0.54173	0.000523722	0.00456973
Ccdc114	-0.532828	0.00052596	0.00458589
Slc25a19	-0.449485	0.000528233	0.00460235
Mrps9	-0.430258	0.000528829	0.00460362
Itgb5	-0.457144	0.000529489	0.00460362
Dctn3	-0.512803	0.000529538	0.00460362
Ptpn6	0.435741	0.000530498	0.0046086
Mbp	-0.389001	0.000532678	0.00462417
Hyal1	-0.654553	0.000535676	0.00464681
Tgfbr1	-0.443448	0.000537235	0.00465356
Optn	-0.663213	0.000537088	0.00465356
Gstp1	-0.514493	0.000538074	0.00465745
Anpep	-0.581962	0.000541991	0.00468795
Galnt10	-0.622618	0.000544346	0.0047049
Uhrf2	0.421971	0.000546434	0.00471953
Ccdc130	0.412227	0.000553035	0.00477308
Rassf2	0.404951	0.000554349	0.00477943
Gipc1	-0.481796	0.000554573	0.00477943
Pop5	-0.406598	0.000557866	0.00480434
Myo10	0.631804	0.000558272	0.00480437
Rap1b	0.491478	0.000560165	0.00481718
Cd63	-0.473147	0.000564299	0.00484923
Map3k14	0.478829	0.000569811	0.00489245
LOC100040573	-0.610086	0.000570149	0.00489245
OTTMUSG00000002038	-0.470865	0.000571288	0.00489869
Tnf	0.892273	0.0005737	0.00491584
Arpc5	0.418445	0.000575341	0.00492636
Vars	0.686243	0.000578918	0.00495185
Rgs1	-0.478903	0.000579149	0.00495185
Rab17	-0.701858	0.000581795	0.00497091
Fem1b	-0.42796	0.000585161	0.00499251
Alox5	-0.705661	0.000585026	0.00499251
Itlnb	0.912009	0.000589688	0.00502753
Lgals8	0.49032	0.000591869	0.00504252
Med21	0.46392	0.000603162	0.00513507
2010005H15Rik	0.957997	0.000607939	0.00515701
Prpf3	0.481228	0.000608346	0.00515701
Hps3	0.450623	0.000608768	0.00515701
Nkiras2	-0.437268	0.000608745	0.00515701
Sf3b5	-0.441205	0.000606637	0.00515701
Map2k5	-0.482416	0.000606971	0.00515701
Src	-0.550135	0.000608126	0.00515701
Arhgap25	-0.528471	0.000611243	0.0051743
F9	0.487358	0.000614645	0.0051994
Cbx7	-0.426964	0.000623919	0.0052741
Dap3	-0.383574	0.000626765	0.00529441
Afg3l1	0.427231	0.000627413	0.00529613
Nol5	0.494085	0.000631014	0.00532276
Nab1	0.53654	0.00063505	0.00534923
Fam169b	-0.620606	0.000634948	0.00534923
Il2rg	0.509385	0.000636559	0.0053506
AW049604	0.502817	0.000636523	0.0053506
Atm	0.408498	0.000636119	0.0053506
Rad23a	0.812437	0.000641178	0.00538523
Epb4.1l1	0.513701	0.000641582	0.00538523
Rab4b	0.611279	0.00065022	0.00545389
LOC100047155	0.39174	0.000651699	0.00546245
Metrn	-0.40372	0.000653497	0.00547367
Qsox1	0.45579	0.00065548	0.00548642
Rhof	1.14424	0.000661768	0.00553517
Hat1	0.405972	0.000664459	0.00555106
Slc7a2	-0.540052	0.000664599	0.00555106
Shf	-0.535706	0.000669465	0.00558778
Mybl2	-0.647174	0.000669959	0.005588
Psmb10	0.450025	0.000672737	0.00560332
Mtdh	-0.450999	0.000672318	0.00560332
Flot2	-0.382688	0.000674429	0.00561349
Skap2	0.563098	0.000675815	0.0056211
Ciao1	-0.479274	0.000677007	0.00562709
Slc45a3	-0.655625	0.000677786	0.00562963
Hprt1	0.470228	0.000678908	0.00563503
LOC100048726	0.458763	0.000680197	0.0056418
Dexi	-0.477609	0.000681468	0.00564841
Ffar2	0.534063	0.0006822	0.00565055
Cd84	-0.449485	0.000685333	0.00567256
Prdx1	-0.742954	0.000690325	0.00570992
BC046404	0.444834	0.000692755	0.0057181
Tnfaip8l2	-0.408098	0.000692134	0.0057181
Gyg	-0.68396	0.00069248	0.0057181
Dph2	0.463749	0.000693307	0.00571871
BC055368	-0.451991	0.000695828	0.00573157
Raet1b	-0.757485	0.00069544	0.00573157
Golm1	0.41069	0.000698129	0.00574654
Nin	0.368904	0.000699388	0.00575294
Eno2	-0.475522	0.000700115	0.00575495
Ncaph2	-0.405749	0.000702082	0.00576713
1200015F23Rik	0.578901	0.000702862	0.00576957
Them2	-0.452606	0.000707132	0.00580062
Wasf2	0.532156	0.000708748	0.00580306
Sdc3	0.396614	0.00070889	0.00580306
1700088E04Rik	-0.573132	0.000708638	0.00580306
Rnf128	-0.440885	0.000710086	0.00580661
Tspan17	-0.759685	0.000710297	0.00580661
Adora2b	0.639161	0.000713429	0.00582821
Tceal8	-0.471542	0.00071453	0.00583321
Man1c1	-0.653422	0.000715058	0.00583352
Dmwd	0.797953	0.000717808	0.00584795
Atp10d	0.3785	0.000717709	0.00584795
C3	0.505876	0.000724476	0.00589824
Trmu	0.470177	0.00072609	0.00590735
1110049B09Rik	0.807628	0.00073124	0.00594519
Casp9	-0.651962	0.000732291	0.00594968
Lamp2	0.448713	0.000732999	0.00595137
Gpr107	0.411326	0.000736295	0.00597406
Mfap3l	-0.789041	0.000738298	0.00598624
Elmo1	0.56524	0.000740151	0.00599718
Fcgrt	0.575556	0.000740749	0.00599726
Per2	-0.58774	0.000741167	0.00599726
Sec15l1	0.531926	0.000743238	0.00600994
Hist1h4j	0.537096	0.000744115	0.00601296
Dscr1	-0.447163	0.000745019	0.00601618
Btbd6	-0.502917	0.000749109	0.00604511
Tfpi	-0.526563	0.000751471	0.00606007
Slc15a3	0.429465	0.000753246	0.00607027
Rgs7bp	-0.460834	0.000754378	0.00607529
Lair1	0.74043	0.000757433	0.00609386
Pbx2	0.676518	0.000758218	0.00609386
Ap1gbp1	-0.436246	0.000757867	0.00609386
Ggcx	0.619333	0.000760474	0.00610788
Atf4	0.505296	0.000761685	0.00611349
Cebpa	-0.837691	0.000764067	0.00612848
Il15	0.417408	0.000764757	0.00612989
Marcks	0.437088	0.000767083	0.0061444
Aadacl1	-0.489379	0.000769462	0.00615931
Taf9b	-0.524645	0.000773693	0.00618902
Irs2	-0.520643	0.000774512	0.00619142
Luzp1	0.469624	0.000775319	0.00619332
Bcas3	-0.498128	0.000775789	0.00619332
Crebl1	0.388254	0.000778172	0.00620819
Mocs2	-0.452823	0.000783786	0.00624879
Mobk1b	-0.350607	0.000785957	0.00626191
Fcgr3	0.403551	0.000788669	0.00627932
Pik3r1	0.374112	0.000790778	0.00629191
Arhgap25	-0.420693	0.000794571	0.00631788
Exosc10	0.45173	0.000801176	0.0063628
Cyp4f13	0.402941	0.000801822	0.0063628
Synj2bp	-0.4648	0.000801576	0.0063628
Uhrf1bp1l	-0.372645	0.00080256	0.00636441
Ubxn6	-0.461492	0.000804249	0.00637357
Cd151	-0.462445	0.000806373	0.00638615
Patz1	0.383818	0.000808696	0.00640029
Dars	0.386922	0.000813466	0.00643378
Evi2a	0.491705	0.000814497	0.00643766
Pld4	-0.381189	0.000820277	0.00647905
Pex11c	-0.721496	0.00082376	0.00650225
Spag9	-0.423692	0.000824591	0.0065045
Tceal1	-0.796534	0.000826665	0.00651655
Pik3ap1	0.8609	0.000828459	0.00652401
Mfge8	-0.423787	0.000828927	0.00652401
B230118H07Rik	-0.448204	0.000829254	0.00652401
Ndufc2	-0.44284	0.000835132	0.00656592
Lpcat3	-0.484478	0.000837456	0.00657985
Stap1	0.468647	0.000843985	0.00662678
Tcirg1	-0.510488	0.000846949	0.00664568
P2ry12	-0.524994	0.000851522	0.00667717
Was	0.450083	0.00085366	0.00668953
Ifi202b	0.748364	0.000856227	0.00670523
D030051N19Rik	0.489432	0.000859757	0.00672846
Aif1	1.00547	0.000860735	0.0067317
Usp25	0.704521	0.000863623	0.00674985
Heatr5a	0.440304	0.000864567	0.00675046
Mospd1	-0.476816	0.000864833	0.00675046
4632417K18Rik	0.440284	0.000868046	0.0067711
Fbxl18	0.519849	0.000872708	0.00680301
Banf1	0.479834	0.000874696	0.00681405
Blnk	-0.516041	0.000876156	0.00682097
Phf6	0.569153	0.000877555	0.0068274
Ninj1	-0.534988	0.000880662	0.0068471
Fam110c	0.870147	0.00088132	0.00684775
Tctn3	-0.362866	0.000889022	0.0069031
Trafd1	0.407635	0.000890059	0.00690665
Phf20l1	0.624666	0.000892803	0.00692343
Arid5b	-0.514034	0.000894584	0.00693274
Dtx2	0.561133	0.000898963	0.0069493
Ppp1r13b	0.533212	0.000898826	0.0069493
Tirap	0.465806	0.000899054	0.0069493
Slco4a1	-0.655015	0.000898757	0.0069493
Tagap	0.708805	0.000900876	0.00695437
Stk11ip	-0.443124	0.000900871	0.00695437
1110032E23Rik	-0.535941	0.000904614	0.00697871
Fah	-0.432714	0.00090873	0.00700569
Ctsd	-0.527825	0.000909288	0.00700569
Ica1	-0.749764	0.000922189	0.0071005
Cept1	0.377993	0.000923289	0.00710438
Pde4dip	0.460624	0.000924149	0.00710641
Tmsb10	-0.579397	0.000926031	0.00711629
Jmjd2c	0.503379	0.000927399	0.00711762
Acad10	-0.621681	0.000926823	0.00711762
Lmna	-0.40945	0.000931994	0.00714828
Oprs1	-0.369209	0.000934175	0.00716041
Wnk1	0.618291	0.000939252	0.00719007
Nup43	0.503462	0.000938865	0.00719007
Oas1c	0.572825	0.000943651	0.00721912
Rnf167	0.58542	0.000947372	0.00723866
Akr1a4	-0.406205	0.000947421	0.00723866
Sfxn3	-0.495593	0.000952084	0.00726963
Nfe2l2	-0.577268	0.000963249	0.00735017
Nr1h2	0.370786	0.000965718	0.00736429
Zfp608	-0.501945	0.000970817	0.00739844
Ikzf1	0.469485	0.000971895	0.00740193
Prnp	-0.469234	0.000973025	0.0074058
Otub2	0.432725	0.000974076	0.00740907
Btbd3	-0.459457	0.00097508	0.00741197
Hspe1	0.633952	0.000978295	0.00743167
Etaa1	-0.401376	0.000982049	0.00745544
1810049H13Rik	-0.405373	0.000986136	0.0074817
BC031353	-0.475078	0.000990113	0.0075071
Ypel3	-0.474495	0.000997605	0.00755909
Rhod	-0.586917	0.000998664	0.00756231
6620401K05Rik	0.429563	0.000999951	0.00756725
Gp9	0.595495	0.00100362	0.00759018
6230427J02Rik	0.444379	0.00100629	0.00760558
Ccl4	0.545413	0.00101021	0.00762477
Olfm1	-0.46002	0.00101012	0.00762477
Cul7	-0.58307	0.00101075	0.00762477
Clic4	0.386062	0.00101807	0.00767512
Gstk1	-0.459195	0.00101871	0.00767512
Cad	0.46156	0.00101985	0.0076788
Slc39a13	0.571054	0.00102498	0.00771262
Tst	-0.433427	0.00103422	0.0077772
LOC100046959	-0.467926	0.00104051	0.00781956
Rnf31	0.457231	0.0010457	0.00785364
Slc35b4	-0.406346	0.00105072	0.00788638
Ccl27	0.506096	0.00105818	0.00793738
Rab3il1	-0.371995	0.00106164	0.00795832
Tcirg1	-0.428447	0.00106557	0.00798273
Tmem218	-0.456172	0.00106885	0.00800231
9930111J21Rik	0.520675	0.00107521	0.0080398
Trit1	0.346266	0.00107509	0.0080398
Pnpla2	-0.39513	0.00107814	0.00805668
9930104L06Rik	0.679771	0.00108306	0.00808836
2210418O10Rik	-0.39288	0.00108697	0.00811247
Cmc1	-0.367443	0.00108876	0.0081207
Top1	0.433332	0.00109352	0.00814647
LOC237408	0.38362	0.00109358	0.00814647
Ccdc85b	-0.464741	0.0010943	0.00814678
Hp	0.827478	0.00109556	0.00815106
Srm	0.507072	0.0010985	0.0081627
Bat1a	0.471599	0.00109834	0.0081627
Fbxw17	0.485676	0.00110035	0.00817142
Myo6	0.438406	0.00110532	0.00820318
Irak3	0.512393	0.0011074	0.00820838
Thbd	-0.595644	0.00110715	0.00820838
Cdc37l1	0.461613	0.00112557	0.00833792
Sorl1	0.447881	0.00112836	0.00835334
Stard8	-0.398546	0.00113043	0.00836353
Serpina3h	0.655443	0.00113563	0.00839679
Arsg	-0.594482	0.00114325	0.00844787
Gtdc1	0.403013	0.00114538	0.00845834
Lig3	0.494049	0.00115248	0.00850549
Ppap2b	-0.899225	0.00115449	0.0085151
Hspa9	0.446393	0.00115606	0.00852142
Prpf40a	0.483781	0.00115951	0.00853704
Atp6v0e2	-0.477217	0.00115962	0.00853704
Slc2a8	-0.382304	0.00116105	0.00854229
D6Mm5e	-0.472546	0.00116506	0.00856652
Tgm2	-0.510483	0.00116668	0.00857313
Golga3	0.415307	0.00116762	0.00857476
Ankfy1	0.442734	0.00117247	0.00859452
Aplp2	-0.393992	0.00117139	0.00859452
C4b	-0.521554	0.00117209	0.00859452
Gas7	0.490873	0.0011738	0.00859895
Map1lc3a	-0.359161	0.00117938	0.00863277
Gusb	-0.426755	0.00117986	0.00863277
D10Ertd322e	0.43427	0.00118626	0.00867429
E130012A19Rik	-0.457676	0.00118838	0.00868446
Parp1	-0.537142	0.00119177	0.00870388
Pdlim2	0.72578	0.00119974	0.00873896
Xpo4	0.55408	0.00120062	0.00873896
Psme1	0.464579	0.00120097	0.00873896
Adrbk1	0.347326	0.00119967	0.00873896
Anxa3	-0.468098	0.00119782	0.00873896
Vamp5	-0.720377	0.00120025	0.00873896
Zfp512	-0.360734	0.0012025	0.00873937
Phax	-0.430879	0.00120195	0.00873937
Tor1aip1	0.369293	0.00120634	0.00876195
Trp53inp1	-0.529681	0.00120983	0.00878196
Gpr89	-0.440728	0.00121196	0.00879206
Taldo1	-0.368789	0.00122656	0.00888715
Hey1	-0.666902	0.00122623	0.00888715
Tubb5	0.431733	0.00123157	0.00891804
Cd81	-0.396451	0.00123521	0.00893898
Marcksl1	0.555078	0.00124471	0.00900223
Csde1	0.428941	0.0012558	0.00907693
2510049I19Rik	-0.495083	0.00125993	0.00909575
Cyb561d2	-0.529108	0.00125937	0.00909575
Srfbp1	0.374665	0.00126295	0.00911203
Elmo1	0.484586	0.0012642	0.00911554
Ap4b1	0.388851	0.0012667	0.00912805
Usp1	0.41388	0.00126943	0.0091422
Ggta1	-0.390083	0.0012831	0.00923509
Ugt1a10	0.469297	0.0012868	0.00925612
Itsn2	0.396823	0.00128786	0.00925815
Ppp1r3c	-0.388032	0.0012917	0.0092792
Fahd1	-0.42484	0.00129313	0.0092792
Large	-0.580515	0.00129286	0.0092792
Phf7	-0.395298	0.00129479	0.00927994
Avpi1	-0.591927	0.00129407	0.00927994
Nme4	0.65802	0.00129755	0.00929418
Mtch1	-0.483748	0.00129873	0.00929706
Sepsecs	0.45392	0.00130335	0.00932448
Ptpn6	0.506158	0.00130476	0.00932898
Phtf2	0.509301	0.0013089	0.00935298
Nrp1	0.520597	0.0013109	0.00935632
Smox	-0.562267	0.00131094	0.00935632
Tnfaip8l2	-0.472843	0.00131247	0.00936163
Zbtb17	0.403324	0.00132353	0.00943491
Cd68	-0.588426	0.00132776	0.0094594
Itfg3	-0.457492	0.00133415	0.00949358
Tusc1	-0.612537	0.00133353	0.00949358
Aldh18a1	0.454445	0.00133742	0.00949488
Rhbdd1	0.434084	0.00133647	0.00949488
Mrps28	0.395608	0.00133752	0.00949488
Sephs1	-0.457383	0.00133715	0.00949488
Hagh	0.374663	0.00133968	0.00950456
Cfp	0.348047	0.00134184	0.00951422
Hnrpdl	0.490932	0.00134929	0.00956131
Gusb	-0.438907	0.0013524	0.00957769
Cox7a1	-0.561342	0.00135945	0.00962189
Tmtc4	0.926009	0.00136265	0.00963311
Snx2	0.640453	0.00136219	0.00963311
Ms4a6b	0.803151	0.00136546	0.00964412
LOC677205	0.375507	0.00136583	0.00964412
Lmna	-0.36487	0.00137521	0.00970467
Sfrs3	0.354279	0.0013821	0.00974749
2310044H10Rik	-0.349603	0.00138424	0.00975678
St6galnac4	-0.577608	0.00139094	0.0097982
4930515G01Rik	0.489153	0.00139276	0.00980528
Ifi205	0.781478	0.00139668	0.00982707
Xab1	0.47476	0.00139771	0.00982853
Rfc2	-0.378944	0.00140897	0.00990183
Tbk1	-0.361319	0.00141536	0.00993022
Dlg3	-0.415274	0.00141551	0.00993022
Hsd17b11	-0.581693	0.0014143	0.00993022
Nfe2l1	0.36383	0.00141814	0.00993699
Klhl22	-0.439178	0.00141733	0.00993699
Tsku	-0.541458	0.00142355	0.009969
Ythdf3	0.501792	0.00142606	0.00998074
