# Supplementary material for: Transcriptome Analysis of Genes Regulated by Cholesterol Loading in Two Strains of Mouse Macrophages Associates Lysosome Pathway and ER Stress Response with Atherosclerosis Susceptibility
Source: PLoS One. 2013 May 21;8(5):e65003. doi: 10.1371/journal.pone.0065003 (PMC3660362; doi:10.1371/journal.pone.0065003)
Supplement: Table S3 — Differentially Expressed Transcripts between AKR and DBA/2 that Overlap between Experiment 1 and 2 Datasets in Unloaded BMM. (XLS) [file pone.0065003.s005.xls]

## Sheet: Sheet1
Table S3: Differentially Expressed Transcripts between AKR and DBA/2 that Overlap between Experiment 1 and 2 Datasets in Unloaded BMM
	Experiment 1 data		Experiment 2 data
Gene Symbol	Log2Fold Change (DBA/AKR)	FDR Adjusted P-Value	Log2Fold Change (DBA/AKR)	FDR Adjusted P-Value
Sfi1	3.68523	1.24683e-15	2.29416	3.44002e-08
AA881470	3.1927	2.05828e-15	3.3209	9.62982e-09
Prcp	3.3258	5.27995e-15	3.31715	1.4127e-09
Stab2	3.45728	8.96906e-15	2.25814	8.85472e-08
Gpnmb	-2.99783	2.56267e-14	-3.34841	5.56311e-06
Gpnmb	-3.72466	6.40568e-14	-4.65119	1.28682e-05
Pilrb1	3.30108	1.8102e-13	5.15141	1.4127e-09
Cd276	-2.8623	1.86392e-13	-2.92429	4.07737e-07
Thumpd1	-2.43476	2.23418e-13	-3.59744	3.58778e-07
Atp2a3	2.70318	5.0057e-13	2.60356	2.18859e-08
Napsa	-1.90701	2.86009e-12	-2.74917	3.44002e-08
Gpnmb	-1.74079	5.10299e-12	-2.88552	0.000211048
Insl6	1.79015	1.39611e-11	2.32358	4.3485e-08
Snx5	-2.27211	1.58156e-11	-1.86497	5.09541e-06
Il11ra1	1.76296	1.68378e-11	1.18233	2.68594e-06
Osbpl3	1.81538	1.69378e-11	1.38904	9.22926e-07
BC022687	-1.77187	1.74572e-11	-2.59819	1.23736e-07
Soat1	1.87213	3.0371e-11	1.63545	2.36852e-06
Atg9b	1.60667	3.13319e-11	1.79269	6.26948e-07
Mlycd	1.69987	3.20948e-11	1.02116	1.91404e-05
Tlr1	-1.77516	3.94733e-11	-0.737534	0.00102888
Sfi1	2.10677	4.29741e-11	2.03945	4.6843e-07
Zfp30	1.7571	4.8143e-11	1.22889	3.57015e-06
Ero1lb	1.99955	8.73657e-11	3.12476	2.18859e-08
Usp39	1.40154	1.45606e-10	2.06065	8.21123e-08
Gps2	-1.37212	1.99848e-10	-1.36982	4.19318e-07
Ncf2	1.44798	2.0799e-10	0.670286	0.000742704
LOC100045359	1.47571	2.39135e-10	0.961088	2.12181e-05
Tmem63b	1.3595	2.91566e-10	0.899032	5.79332e-05
LOC100048020	-1.49524	3.19132e-10	-2.00629	3.44002e-08
P2ry1	-1.59448	3.19132e-10	-1.95937	1.43033e-05
Pdxdc1	1.33266	3.32242e-10	0.929397	0.0013903
2210012G02Rik	-1.45283	3.66801e-10	-1.78426	2.88025e-06
Abhd1	-1.47582	3.72514e-10	-1.43184	1.32015e-06
Ddx6	1.69409	3.72819e-10	1.31112	2.35689e-05
C2	-1.4897	3.72819e-10	-1.73159	1.16043e-06
Tmem8	1.38682	4.32419e-10	1.12588	5.61072e-06
Apobec1	-1.51908	4.969e-10	-1.84141	4.45333e-07
Pdxdc1	1.54911	5.00686e-10	1.97011	1.92018e-07
Camk2b	1.98708	5.47089e-10	1.28146	1.28682e-05
C130026I21Rik	1.70123	5.82605e-10	1.90381	1.69399e-05
Cxcl14	1.15909	8.46923e-10	2.05677	6.08429e-07
Rapgef5	1.2946	8.46923e-10	2.03092	1.97334e-07
Tubb6	-1.39533	1.02783e-09	-0.765454	0.00397902
Abhd1	-1.36276	1.08752e-09	-1.90261	1.31876e-06
Ltb	1.40276	1.61941e-09	2.20905	2.16904e-06
Gjb4	-1.15886	1.7249e-09	-1.42149	1.54994e-05
Sipa1l1	1.14737	1.7249e-09	1.0872	3.84374e-05
Capn5	1.26203	2.07063e-09	0.708783	0.000321252
Erdr1	-1.61173	2.11716e-09	-2.16761	7.44201e-05
Ext1	1.61934	2.16705e-09	1.36866	7.20621e-07
Enpp1	-1.09215	2.26564e-09	-1.44593	5.46288e-07
Cenpa	1.31862	2.3754e-09	-0.879592	0.000470742
Akr1e1	1.66751	2.9056e-09	2.79915	4.89602e-08
Ryk	-1.02563	4.29689e-09	-1.68653	2.89199e-07
Prss22	-1.58227	4.29689e-09	-2.11074	1.85287e-06
Arhgap24	-1.1364	4.61735e-09	-1.42025	2.28529e-06
Zmiz1	1.1313	5.27347e-09	0.968279	2.39781e-05
Ass1	1.10086	5.93718e-09	0.730724	0.00155018
Pmp22	-1.14577	8.05099e-09	-1.06658	9.86378e-06
Pdk1	1.25173	8.23065e-09	1.27343	9.40762e-06
LOC100046056	1.1161	8.44241e-09	1.23351	6.27732e-05
Amica1	1.07283	8.44241e-09	1.56502	4.50694e-06
Pdlim4	1.3162	8.75221e-09	0.935004	2.82842e-05
Lrp4	-0.947481	8.75221e-09	-0.779651	0.000983805
Nudt19	-0.960198	9.536e-09	-0.566045	0.00127275
A630042L21Rik	1.27179	1.20558e-08	1.73271	7.42545e-08
0610037D15Rik	1.20139	1.35041e-08	1.63682	1.16301e-06
Tuft1	-1.03254	1.38124e-08	-1.38107	1.17921e-06
Nhedc2	1.39437	1.4339e-08	1.40198	0.00262247
Tjp2	-1.19865	1.52761e-08	-1.51512	9.3257e-05
Fxyd2	-1.61855	1.54308e-08	-3.64841	1.72852e-08
Galnt2	1.06602	1.55422e-08	1.21806	0.000821412
Deadc1	-0.966538	1.5957e-08	-1.14928	1.05951e-05
LOC100048556	-1.06372	1.63337e-08	0.99029	3.84353e-05
Snx5	-1.54512	1.65788e-08	-0.572853	0.0044376
Ltb4r1	-1.03466	1.65788e-08	-1.03936	1.10421e-05
Cdkn2aipnl	-1.16116	1.79635e-08	-0.979431	1.69166e-05
Casp4	1.17249	1.80195e-08	0.656913	0.00307841
Usp2	1.37849	1.94899e-08	2.25117	2.92715e-07
Gpc1	1.09574	2.22473e-08	-1.00769	3.7149e-05
Aldh2	0.980205	2.59862e-08	0.533284	0.000944167
Rpl7l1	1.16911	2.7175e-08	0.864349	0.000289243
Sccpdh	-0.965879	2.73187e-08	-1.08351	2.00992e-06
Pim1	1.25509	2.80045e-08	0.863956	0.00296021
Cox7a1	-0.890538	3.48577e-08	-0.561342	0.00962189
Ptpla	-0.986368	3.89366e-08	-1.09793	5.83214e-05
Myo6	0.885967	4.09408e-08	0.438406	0.00820318
Nasp	-1.05389	4.26665e-08	-1.30188	1.92415e-06
Blm	-0.964446	4.27799e-08	-1.38507	2.51388e-05
Sys1	0.840526	4.90449e-08	1.11119	4.44973e-06
Ccr5	-0.98473	5.14774e-08	0.779309	8.66881e-05
Chic2	-0.917817	5.92844e-08	-0.877273	3.44047e-05
Bhlhb2	-1.1206	6.46233e-08	-2.10001	9.0648e-06
Enpp4	0.860068	6.46233e-08	1.34887	5.91897e-05
B230312I18Rik	-1.00331	7.28214e-08	-1.08739	9.45933e-06
Itpr1	0.99584	7.68749e-08	1.40743	4.45333e-07
Tle1	0.932147	8.01134e-08	0.952796	3.00734e-05
Chst1	0.985791	8.23995e-08	1.20072	2.32339e-05
Fam110c	0.964876	9.29639e-08	0.870147	0.00684775
D16Ertd472e	0.885005	9.79405e-08	0.841486	0.000138287
Acss1	-0.79308	1.00316e-07	-1.11537	2.25397e-05
Fli1	-0.849524	1.08076e-07	-0.773892	0.000315221
Agtrap	-1.09121	1.10399e-07	-1.66994	2.82916e-06
Vwf	1.03535	1.15223e-07	-0.771844	0.00100438
Klf9	-0.85244	1.17749e-07	-2.37365	9.29552e-07
Rsad2	0.94608	1.25186e-07	1.25893	2.64089e-05
Slco3a1	1.14446	1.37315e-07	1.3949	8.14429e-06
Mrpl48	-0.946255	1.37816e-07	-1.2546	3.70282e-06
Mertk	-0.946499	1.39568e-07	-1.20342	6.88077e-05
Pop4	1.2636	1.39568e-07	1.12023	5.53245e-06
Smox	-1.00894	1.39568e-07	-0.737478	0.00211024
Cd55	1.02251	1.39568e-07	2.18422	2.21787e-06
Prps1	-1.01559	1.41468e-07	-0.857785	0.000786331
LOC100044475	-1.07699	1.5483e-07	-1.48285	1.08983e-06
Bid	0.727817	1.68402e-07	0.952473	1.91941e-05
Pigx	-0.933268	1.69261e-07	-0.890821	1.99739e-05
LOC100048556	-1.1412	1.84931e-07	0.90776	0.000285163
S100a1	-0.815617	1.89687e-07	-1.50564	1.08383e-06
AI451557	0.789626	2.03103e-07	1.21777	2.88025e-06
Fxyd2	-1.01785	2.04363e-07	-2.57455	1.78665e-07
LOC100048845	-1.32631	2.10236e-07	-1.74407	2.3293e-07
Tbc1d9b	0.855351	2.52032e-07	0.81721	0.000167697
Bbx	0.817738	2.83198e-07	0.53511	0.00125313
LOC100044172	-0.742162	2.9919e-07	-1.00721	1.36949e-05
Myo5a	-0.825708	3.01509e-07	-1.83933	4.90128e-07
Ada	-0.814908	4.65268e-07	-0.692785	0.00241024
Map3k14	0.93807	5.58966e-07	0.478829	0.00489245
Tmem82	0.821844	5.9018e-07	0.624631	0.00144448
Man2a2	-0.872677	5.97078e-07	-1.04323	1.9766e-05
Tmem180	0.832366	6.14974e-07	0.964389	1.43586e-05
Scamp5	0.892187	6.73627e-07	0.845999	7.39369e-05
Ctsk	-0.796913	6.82559e-07	-1.73337	1.01903e-05
Plxdc1	-0.833925	6.82559e-07	-1.02461	1.01486e-05
Rassf2	0.807235	7.07047e-07	0.404951	0.00477943
Unc45a	-0.713822	7.11373e-07	-1.00699	7.73342e-06
Lhfpl2	0.842725	7.32016e-07	-0.664427	0.001658
Prdx5	-0.700642	7.60885e-07	-0.731161	0.00107431
Myo7a	-0.76821	7.65728e-07	-0.651182	0.00170569
Slco3a1	0.842748	7.87989e-07	1.13212	3.44047e-05
Rab3il1	-0.914904	7.99729e-07	-0.371995	0.00795832
Gstm1	0.629401	8.07468e-07	-0.917943	1.92545e-05
Nin	0.645819	8.50857e-07	0.368904	0.00575294
Ptpn22	0.77261	8.75415e-07	1.3737	2.87858e-05
F5	0.845635	1.04396e-06	0.975784	0.001674
Scp2	-0.785488	1.06012e-06	-0.749001	0.00026121
Hmgn3	-1.0449	1.08802e-06	-0.839079	6.62062e-05
LOC100047934	0.640137	1.18709e-06	1.29168	1.6614e-06
Stard4	1.0294	1.2266e-06	1.06368	1.01903e-05
Slco3a1	0.864736	1.2266e-06	0.883188	0.00283978
Cd74	-0.793185	1.46696e-06	-1.2589	9.21746e-05
Itpr3	0.675532	1.5013e-06	0.826608	0.000288806
Tfrc	-0.850088	1.51601e-06	-0.786836	0.000230163
LOC100046232	0.690869	1.52041e-06	0.534855	0.00263632
Mmp9	-1.08359	1.53149e-06	-0.62876	0.000409453
Ccl4	0.925725	1.58242e-06	0.545413	0.00762477
Cenpb	-0.580709	1.6656e-06	-0.553256	0.00279532
Cdt1	-0.683886	1.75838e-06	-0.677576	0.00158756
Man2a2	-0.807156	1.86682e-06	-1.10478	5.4473e-06
Tnfrsf21	-0.728076	1.97384e-06	-0.992628	0.000110128
Coro2a	0.667322	1.98912e-06	0.73545	0.000368395
Sorl1	0.811554	2.0007e-06	0.447881	0.00835334
Enc1	0.738928	2.05661e-06	-0.662365	0.00123716
Parvg	-0.600376	2.19102e-06	-1.7705	8.82982e-07
St18	-1.17064	2.23513e-06	-1.11096	7.67268e-05
Gab2	-0.906898	2.23513e-06	-0.633234	0.00106475
Kif3c	0.669392	2.37922e-06	0.62675	0.000442879
Traf3	0.69298	2.87014e-06	0.639979	0.000567315
Trpv4	-0.682406	2.88496e-06	-0.683054	0.000144602
Uck1	-0.652264	3.01973e-06	-0.962447	0.000110575
Gtf2h2	0.661827	3.33723e-06	0.856056	3.54899e-05
Pparg	-0.66452	3.4e-06	-0.816696	0.000323725
Amdhd2	-0.848246	3.47781e-06	-0.635408	0.000604441
Tsen2	-0.675071	3.71172e-06	-0.665755	0.000680039
Ptk2	-0.566034	3.71172e-06	-0.676273	0.000248716
Dnajc16	-0.657115	3.75834e-06	-0.966556	9.2365e-05
Myd116	0.842296	3.85987e-06	-0.473528	0.00446167
Hps6	-0.592647	4.02694e-06	-1.344	1.08983e-06
Pold3	0.685298	4.15254e-06	0.71078	0.000180503
Pmp22	-0.632074	4.20882e-06	-0.64135	0.000361382
Stac2	0.642511	4.23189e-06	-0.713952	0.00156562
Htr2b	-0.560561	4.62588e-06	-0.660801	0.00298603
Gpr89	-0.5492	4.77038e-06	-0.440728	0.00879206
Eno2	0.595955	4.77991e-06	-0.475522	0.00575495
Slco4a1	-0.704624	5.06533e-06	-0.655015	0.0069493
Ptplad2	0.717888	5.0877e-06	0.625549	0.00150307
Ahnak	0.544216	5.2375e-06	-0.573369	0.00040868
Cd274	0.603304	5.49065e-06	0.543675	0.00123304
Csrp2	-0.584445	5.70698e-06	-0.731773	0.000855591
Fxyd2	-0.735906	5.79203e-06	-2.11296	6.08429e-07
Rbms3	0.609043	6.19113e-06	0.642526	0.00333336
Agrn	0.553939	6.20779e-06	0.59271	0.000802952
Ap4b1	0.54036	6.29126e-06	0.388851	0.00912805
Adora2b	0.838013	6.3066e-06	0.639161	0.00582821
Tm2d3	-0.604609	6.46413e-06	-1.08069	1.47329e-05
Phf20l1	0.539577	6.58734e-06	0.624666	0.00692343
Tpst1	0.536205	6.71995e-06	0.722099	0.000264243
Fgfr1op2	-0.681567	6.84838e-06	-0.703356	0.000657109
Hsd17b11	-0.676628	6.91692e-06	-0.784136	0.000208884
Scarf2	-0.541597	6.94358e-06	-0.724185	0.000231145
Capsl	-0.773716	6.94837e-06	-1.84364	4.43122e-06
Fpr1	-0.603365	7.14231e-06	0.799163	0.00153397
Scd1	-0.690072	7.19678e-06	-0.789603	0.00159368
Tyms	-0.725154	7.30474e-06	-1.12023	3.55119e-05
BC031353	0.565046	7.38624e-06	-0.475078	0.0075071
Prdx5	-0.794553	7.5044e-06	-0.719963	0.000106256
Heatr1	0.573576	7.60934e-06	0.825569	2.61441e-05
Gdf15	0.535185	8.59028e-06	0.714684	0.00446454
Pgcp	-0.664139	8.92414e-06	-0.570296	0.00442493
Nasp	-0.690783	9.36149e-06	-1.16847	5.4473e-06
Nrp1	0.670618	1.04917e-05	0.600262	0.0020731
Sh3bgrl2	-0.544191	1.10023e-05	-0.731806	0.00217646
Golm1	0.608774	1.12963e-05	0.41069	0.00574654
Anxa3	-0.495591	1.15472e-05	-0.468098	0.00873896
Lyz1	-0.804559	1.16631e-05	-0.872067	4.23102e-05
Pml	0.564205	1.20301e-05	0.859938	8.77619e-05
Unc5b	-0.561274	1.20301e-05	-0.617068	0.00102138
2210012G02Rik	-0.698817	1.20348e-05	-1.65317	4.83797e-06
Parp1	-0.584794	1.23182e-05	-0.537142	0.00870388
LOC100047480	-0.613953	1.30817e-05	-1.06892	0.000154917
Gnpda1	-0.840198	1.37924e-05	-0.693701	8.75355e-05
Smox	-0.679667	1.40535e-05	-1.20304	2.96614e-06
Trappc2l	-0.531206	1.40535e-05	-0.674786	0.000154257
Rnase6	0.646158	1.55478e-05	1.31086	0.000281521
Atp6v0d1	-0.789612	1.74758e-05	-0.621391	0.0019545
Ccl2	-0.618118	1.81882e-05	1.05422	4.8485e-05
Gngt2	-0.546369	1.84087e-05	-0.810921	0.000191865
Mgst3	-0.552726	1.99012e-05	-1.17309	5.75908e-06
Dgcr6	-0.773158	2.0006e-05	-1.01675	3.56546e-05
LOC100045780	-0.708425	2.01507e-05	-0.857404	0.000379441
Slco2b1	0.808603	2.01702e-05	0.96094	6.52401e-05
Stat3	0.539661	2.12819e-05	1.07209	0.000180503
Arid3b	0.616699	2.25147e-05	0.54552	0.00263079
Stat1	0.488945	2.26425e-05	1.17098	2.81341e-06
Pnpla2	0.540717	2.27678e-05	-0.39513	0.00805668
Ppm2c	-0.538588	2.32388e-05	-0.658847	0.000111123
Prc1	-0.552887	2.37806e-05	-1.58777	1.26059e-06
Klhl21	0.501081	2.40114e-05	-0.572252	0.00193501
Vegfc	0.544984	2.50428e-05	0.8113	0.000634905
Ccrk	-0.46767	2.57314e-05	-0.930955	6.37649e-06
Ly6c1	-0.625759	2.57314e-05	0.739477	0.00307961
Nars	0.654283	2.60177e-05	0.945138	1.31673e-05
Tnfaip1	-0.504047	2.63e-05	-0.524025	0.0021005
Lbx2	-0.494052	2.64253e-05	-0.810513	0.00048664
Arap1	-0.533436	2.66455e-05	-0.702661	0.000247139
Vamp5	-0.73664	2.66664e-05	-0.720377	0.00873896
Prdx1	0.513319	2.68168e-05	0.615046	0.000341787
Mocs2	-0.564999	2.68482e-05	-0.452823	0.00624879
Nrcam	-0.700899	2.73565e-05	-0.646217	0.00116718
Hcls1	0.507996	2.78722e-05	0.749416	3.20475e-05
Samhd1	0.506639	2.7995e-05	0.861684	4.36811e-05
Wnk1	0.539284	2.90243e-05	0.618291	0.00719007
Taldo1	0.465416	3.07434e-05	-0.368789	0.00888715
St7	0.816035	3.08672e-05	1.61401	1.20189e-06
Atp6v0d1	-0.735288	3.17408e-05	-0.56346	0.00072306
Oas2	0.515577	3.51938e-05	0.591988	0.00252719
Itga6	0.533148	3.56018e-05	0.981313	0.000241289
Rshl2a	-0.530088	3.63408e-05	-0.849892	0.000235802
Chst7	0.543089	3.829e-05	1.61164	3.93074e-07
Hyal2	-0.480841	3.89947e-05	-0.538039	0.00124667
Foxj3	0.533447	4.15713e-05	0.74303	0.000309912
Ccrk	-0.518452	4.36283e-05	-0.951021	2.50863e-05
1110032A13Rik	0.461854	4.66469e-05	0.578374	0.00143839
Rasgrp1	0.638941	5.03216e-05	2.55721	1.05951e-05
Uck1	-0.459692	5.16827e-05	-0.764043	0.000127311
B930041F14Rik	-0.537015	5.21721e-05	-1.33122	2.50863e-05
Arhgef18	0.540218	5.34377e-05	0.754095	0.0022124
Tle1	0.605623	5.35876e-05	0.624072	0.00183389
Arhgap27	0.458221	5.68582e-05	0.849282	0.00171765
Mbd4	0.517479	5.68582e-05	0.715915	0.000166051
Rab39	0.455077	5.69464e-05	1.58989	6.2022e-07
Ltc4s	-0.634997	5.83946e-05	-1.10973	0.00104194
St3gal6	-0.490642	5.90218e-05	0.692131	0.00270228
Gramd3	-0.6286	6.20206e-05	-0.7415	0.00142734
Asns	-0.472167	6.36968e-05	1.46008	2.88025e-06
LOC100048796	-0.711304	6.46459e-05	-0.678079	0.00234223
ENSMUSG00000043795	-0.636836	6.4777e-05	-0.581755	0.00372663
Gnptab	-0.485604	6.53659e-05	-0.745191	0.000231339
Clic6	-0.497075	6.60205e-05	-0.721564	0.00118942
Cul7	0.450152	6.69473e-05	-0.58307	0.00762477
Got2	-0.404729	6.81389e-05	-0.386825	0.0043343
Bcl2l11	-0.455497	7.16929e-05	-0.909075	0.00102715
Tdrkh	-0.468557	7.30477e-05	-0.839646	0.00249562
Alg8	0.613694	7.55263e-05	1.62458	5.58338e-07
Hyi	0.488807	7.94733e-05	0.73682	0.000944167
Dci	-0.423011	8.01262e-05	-0.504219	0.00153771
Ndufaf1	0.509326	8.67544e-05	0.595711	0.00103155
Dock8	0.482287	8.73675e-05	0.606606	0.00153771
Sgcb	0.537921	9.49717e-05	0.465503	0.00417761
Vangl2	-0.419715	0.000102779	-0.504247	0.000667231
Gclm	-0.731622	0.000107343	-1.19203	6.43132e-06
Limk1	-0.427721	0.000107343	-0.440227	0.00351046
Cd86	0.50981	0.000108868	1.16237	4.01702e-06
Lgals8	0.440091	0.000112678	0.49032	0.00504252
LOC100040573	-0.496305	0.000114805	-0.610086	0.00489245
Arl6ip1	-0.394157	0.000117355	-0.420565	0.00221487
Cercam	-0.446947	0.000117875	-1.23067	6.76987e-06
Mospd3	-0.4436	0.000122234	-0.525606	0.0028652
Myo10	0.467933	0.000126284	0.631804	0.00480437
Dap3	-0.409259	0.000127433	-0.469702	0.0011229
Fahd1	-0.483772	0.000128714	-0.42484	0.0092792
Atp8a1	0.542105	0.000134397	1.10167	9.52762e-06
Mib2	0.510251	0.000142125	-0.462746	0.00229704
Oprs1	-0.587172	0.000142125	-0.369209	0.00716041
Pros1	-0.610913	0.000143026	-0.67683	0.000273396
Mbp	0.538158	0.000144413	-0.451879	0.00371472
Tsc22d2	0.4278	0.000146002	0.550343	0.00129884
Kdelr2	-0.673649	0.000146394	-0.543567	0.00431548
Axl	0.662009	0.00014989	1.70498	1.21554e-07
Car5b	-0.554353	0.000150948	-0.940381	0.000487263
Paip1	0.389985	0.000151459	2.19819	6.53624e-08
Mmp2	-0.440604	0.000156949	-0.618722	0.00366907
Hsd17b11	-0.444915	0.000157671	-0.86317	0.000688966
Nrp1	0.559134	0.000158026	0.520597	0.00935632
Sdc4	0.451222	0.00015998	0.561344	0.0023889
Rnf31	0.39313	0.000160894	0.457231	0.00785364
Cd300lb	-0.496302	0.000161421	-0.592528	0.000815596
Adam23	1.02456	0.000162483	2.38008	3.10614e-07
Cd47	0.414843	0.000162483	0.42413	0.00263051
Car5b	-0.575628	0.000163407	-0.810679	0.00053501
Tmem86a	-0.433544	0.000166474	-0.451468	0.00268567
Emr1	-0.626444	0.000167831	1.13493	9.63736e-06
AA408296	0.42153	0.000172942	0.50986	0.0035201
Slc13a3	0.817955	0.000174423	3.60494	3.44002e-08
St6galnac4	-0.391927	0.00017667	-0.606723	0.00235737
Gadd45a	0.369054	0.000180764	-0.805328	0.00270501
Tsc22d4	0.448996	0.000180999	0.494027	0.00131014
Oxct1	-0.435989	0.000182128	-0.485692	0.00372236
Pik3cg	-0.644809	0.00018474	-0.915646	2.15106e-05
Mrpl14	-0.423646	0.000187658	-0.600603	0.00169478
Zfp277	-0.469993	0.000190574	-0.788884	0.000341787
Gsta3	0.41985	0.000210074	-1.26828	0.000749652
Tnfaip3	0.523946	0.000223967	0.512705	0.00251412
LOC100045300	0.402215	0.000227858	0.7238	6.13746e-05
Sema4b	-0.479978	0.000237988	-1.26487	6.78718e-05
Nsmaf	0.369555	0.000240117	0.548626	0.00165975
Gstp1	0.375764	0.000242839	-0.54724	0.000734406
OTTMUSG00000016703	-0.623557	0.000259574	-0.798663	0.00244383
Suv420h2	0.421599	0.000278841	-0.582162	0.000646126
Spc25	-0.460978	0.000286399	-0.577093	0.00448682
LOC100045005	0.391809	0.000287715	-0.443735	0.00412962
Slc36a1	-0.386841	0.00028964	-0.796788	0.000179706
LOC100048461	0.528572	0.00028964	-0.582592	0.0021005
Ddit3	0.476517	0.000290032	1.26633	9.29552e-07
Parp1	-0.474396	0.000291715	-0.694892	0.000656046
Gpr85	0.460617	0.000295319	1.59977	5.46288e-07
4930486L24Rik	0.467833	0.000295725	1.09043	5.97085e-05
Dusp1	0.366696	0.000311064	-0.953616	0.00112894
Cd164	0.375834	0.000311519	0.581455	0.00145363
Heatr5a	0.399507	0.000320681	0.440304	0.00675046
Tst	0.51156	0.000322244	-0.433427	0.0077772
Gipc1	-0.439399	0.000330998	-0.504811	0.00433122
Pygb	0.360947	0.000332988	0.410478	0.00357065
Rnase4	-0.449054	0.00034309	-0.520905	0.00217646
Idh1	-0.376183	0.000348207	-0.532055	0.000625391
Rab7	-0.522478	0.000355384	-0.616262	0.00321324
Adam33	0.518164	0.000364507	1.04052	6.53058e-05
5033414K04Rik	0.424717	0.000382385	1.03874	7.22456e-06
Os9	-0.373628	0.000385981	-0.492672	0.00177378
Serpina3g	0.494047	0.000420793	3.20564	1.33125e-08
Tk1	-0.507355	0.000476401	-1.37962	2.72554e-06
Tor1aip1	-0.355338	0.000489095	0.369293	0.00876195
Cd81	-0.37138	0.000498991	-0.396451	0.00893898
Hagh	0.362185	0.000505944	0.374663	0.00950456
Fcgr3	0.443413	0.000517356	0.403551	0.00627932
Tmem41a	-0.334838	0.000517356	-0.602204	0.000570468
Gstm5	-0.410795	0.000527739	-0.719223	0.000378459
Rhob	0.40454	0.00052916	-0.786235	0.00297795
Zfp579	-0.37651	0.000553664	-0.497474	0.00327408
Cd14	0.357242	0.000557167	0.588338	0.000640513
Zbtb17	0.345533	0.0005592	0.403324	0.00943491
Dtx2	0.526174	0.00055935	0.561133	0.0069493
Pqlc3	-0.349077	0.000568823	-0.539321	0.00286613
Marcksl1	-0.581398	0.00059615	0.555078	0.00900223
BC031748	-0.411464	0.000613263	-1.1683	2.20807e-05
Gmpr	-0.503426	0.000620998	-1.13899	2.12181e-05
Trafd1	0.376606	0.000624718	0.684786	0.00134684
Clspn	-0.403012	0.000629369	-0.686397	0.00225619
1110058L19Rik	-0.364754	0.000630563	-0.396472	0.00389455
Igtp	0.355354	0.000635263	1.20558	3.42673e-06
Mef2c	0.36002	0.000645356	0.491194	0.00315156
Hyal1	0.350901	0.000645533	-0.654553	0.00464681
Syp	-0.418413	0.00064757	-0.693231	0.00053501
Parp8	0.440308	0.000682592	0.775899	0.000802759
2410066E13Rik	0.338051	0.000716963	-0.655114	0.000275865
Arhgap4	-0.359197	0.000717667	0.842501	2.95114e-05
Kctd10	-0.343179	0.0007182	-0.612567	0.00118227
Tnfaip8l2	-0.384368	0.000751656	-0.408098	0.0057181
Tspo	0.356941	0.000761749	0.721723	0.000749652
Ubxn6	-0.319356	0.000762325	-0.461492	0.00637357
Lrig3	-0.446286	0.000769977	-1.01776	0.000262467
Arl11	-0.380876	0.000774718	-0.774727	3.39311e-05
Gusb	-0.328862	0.000810145	-0.438907	0.00957769
Cd33	-0.510477	0.000814548	-1.1811	1.6806e-05
Gpr68	-0.386027	0.000815374	-1.75968	7.79183e-05
Pex11c	-0.421949	0.000819845	-0.721496	0.00650225
Mboat1	-0.380483	0.000839261	-1.04828	1.63671e-05
Pofut1	0.417986	0.000872293	0.962456	1.33657e-05
Aars	-0.320884	0.000874909	0.758479	2.87737e-05
Ccdc130	0.345198	0.00088565	0.412227	0.00477308
Gstm2	-0.355988	0.000907538	-1.19246	3.44047e-05
Ehd4	0.338733	0.000916117	0.855874	1.64848e-05
Gabarapl1	0.357462	0.000938201	-0.591494	0.0005553
BC016495	-0.31239	0.000984907	-0.508253	0.00202132
Was	0.376832	0.000992113	0.450083	0.00668953
Pou2f2	0.374523	0.00100164	0.615068	0.00333336
Agpat5	-0.507128	0.00100164	-0.713152	0.00296649
Ccdc125	-0.376505	0.00103147	-0.669214	0.00202793
Anpep	0.31133	0.00104057	-0.581962	0.00468795
Clspn	-0.417638	0.00104528	-0.840574	0.000350571
Ap1gbp1	-0.362588	0.00106031	-0.436246	0.00609386
Bmpr1a	-0.379098	0.00108257	-1.05941	2.50863e-05
Dedd2	-0.424514	0.00109625	-0.982355	0.00117911
Hsd17b7	-0.358404	0.00117169	0.697168	0.00119551
Bmpr1a	-0.446619	0.00118003	-0.892123	0.0001187
Epsti1	0.374692	0.00118623	0.817989	0.000550229
2010005H15Rik	0.950109	0.00119966	0.957997	0.00515701
Synj2bp	-0.450395	0.00120061	-0.4648	0.0063628
AI451617	0.2993	0.00121695	2.08188	3.58717e-07
Iigp2	0.312071	0.00125075	0.843887	0.00011261
Bcl7a	-0.405657	0.00127099	-0.977186	0.00181302
Pde4dip	0.395901	0.0013213	0.460624	0.00710641
Ccnd2	0.437901	0.00146038	2.44831	6.97426e-08
Dap3	-0.415103	0.00146596	-0.383574	0.00529441
Dctn3	-0.42593	0.00151354	-0.810667	0.00020248
Stat2	0.382062	0.0016027	0.950746	4.58407e-05
Lcn2	0.300995	0.00162052	1.41897	1.99082e-05
Slain2	-0.555582	0.00166402	-0.503466	0.00355319
Lman2l	0.282284	0.00168295	0.470121	0.0031257
Ppap2b	-0.35939	0.00168346	-0.899225	0.0085151
Rad23a	0.310325	0.0016881	0.812437	0.00538523
Slc7a4	-0.322744	0.00173361	-0.821941	0.000165273
Sfpi1	0.346633	0.00173692	0.599737	0.00143839
9530068E07Rik	-0.31708	0.00174843	-0.463024	0.00297518
Glt25d1	-0.334854	0.00175765	-0.566546	0.00127624
Sult1a1	-0.474998	0.00179682	-1.3755	4.93873e-06
Gusb	-0.424939	0.00183	-0.426755	0.00863277
Furin	-0.33062	0.00195643	-0.912504	9.37112e-05
Ifitm6	0.421355	0.00195795	0.920932	0.000108149
Rora	0.276357	0.00196681	-0.611571	0.000919115
Oasl2	0.419528	0.00197831	0.919493	2.73553e-05
Kif3a	-0.345946	0.00200206	-1.43773	9.02001e-06
Zmym3	0.375251	0.00201145	0.619664	0.00262247
Pcyt1a	-0.307732	0.0020139	-0.568413	0.000919115
Dgka	-0.322751	0.00222393	-0.808258	0.00011631
Zfyve21	-0.346473	0.00223766	-0.506106	0.000954025
Hyou1	0.289402	0.00231623	1.10264	1.23043e-05
Atp6v0d1	-0.340604	0.00231935	-0.452815	0.00400824
Il10	0.406646	0.00232208	0.887949	0.000167406
Hrsp12	-0.321584	0.00233763	-0.638918	0.00083946
Anln	-0.364134	0.00236933	-1.26503	1.85287e-06
Naglu	-0.321152	0.00238956	-0.842516	0.000172945
Itsn2	0.359604	0.00239735	0.396823	0.00925815
LOC100047214	0.343129	0.00247395	-0.709774	0.000939722
Ehbp1l1	0.318281	0.00249954	0.605946	0.00108529
Phf11	0.329604	0.00257338	1.98123	1.4642e-06
Mrps6	-0.361632	0.00257492	-1.40081	1.50771e-06
Tspan17	-0.370692	0.00258949	-0.806164	0.000288894
Ivns1abp	-0.319741	0.00261575	-0.935652	1.74368e-05
Mag	0.304827	0.0026549	0.746703	0.000112899
4833420G17Rik	-0.350464	0.00275215	-1.09782	0.000175471
Cox6a2	0.362729	0.00282872	2.42614	3.44002e-08
Hsd17b11	-0.363386	0.00297046	-0.581693	0.00993022
Slc35b4	-0.282353	0.00299935	-0.406346	0.00788638
BC004044	-0.349152	0.00308769	-0.814918	0.00083946
Crebl1	0.272536	0.00312234	0.388254	0.00620819
Unc13b	-0.320933	0.00359825	-0.711841	0.000154917
Pold1	0.320051	0.00375444	0.66744	0.00159368
Nupr1	0.323867	0.00380882	1.14954	6.76987e-06
6620401K05Rik	0.336626	0.00399637	0.429563	0.00756725
Ccdc41	0.301859	0.00406825	0.477993	0.00147352
Abhd4	0.274839	0.00416384	-0.642309	0.000635645
Utp11l	0.239985	0.00418037	0.443727	0.00296102
H2-Ea	0.423686	0.0041857	0.817801	0.00174908
Gtpbp4	0.244599	0.00418683	1.02683	8.76412e-06
Stk11ip	-0.332267	0.00426179	-0.443124	0.00695437
Casp9	-0.382064	0.00432829	-0.651962	0.00594968
Ptp4a3	-0.274087	0.00439397	0.607976	0.00270517
Uhrf1bp1l	0.300072	0.00443439	-0.372645	0.00636441
Prkcb	0.293806	0.00485504	0.790593	0.000273396
Mettl8	0.296248	0.00488131	0.654178	0.00234949
Igf2bp3	-0.279527	0.00497499	-0.729346	0.000145929
Wipi1	0.337686	0.00516855	-0.695935	0.000276216
Kif22	-0.317406	0.00518679	-0.847542	9.12462e-05
Nqo1	0.300693	0.00534832	-0.957098	0.00185716
Tpm3	-0.249136	0.00539761	0.701733	7.47561e-05
Adamtsl5	-0.248126	0.00541416	-0.689374	0.000138435
Socs6	-0.308682	0.00541416	-0.659966	0.00235555
Gab1	0.305572	0.00552808	-0.523974	0.00211003
Tubb5	-0.288415	0.00564291	0.431733	0.00891804
Hemk1	-0.246533	0.00622372	-0.660362	0.00159829
Mfap3l	-0.261589	0.00622372	-0.789041	0.00598624
Timp2	-0.300039	0.00628341	-0.53634	0.00219568
Golga2	-0.332127	0.00651419	-0.608016	0.00208429
Dis3l	0.264078	0.00654351	0.5267	0.000881371
Gpr65	0.301482	0.00657126	0.923	0.00111596
Asb2	0.378786	0.00668091	2.63994	2.88025e-06
Gpr84	0.23028	0.0067735	1.19787	0.000800059
Wtip	-0.311331	0.0068407	-0.786254	4.66159e-05
Slu7	0.370292	0.00685378	0.97475	7.37505e-05
Fem1b	-0.257794	0.0069223	-0.42796	0.00499251
Tmem49	0.253648	0.00709753	0.630598	0.00150307
LOC676420	0.269545	0.00717063	-0.523506	0.00183389
Trmu	0.233818	0.00722812	0.470177	0.00590735
Pmm2	-0.241825	0.00742362	0.491344	0.00197764
Pfn2	-0.26711	0.00746603	-1.00649	3.01793e-05
Ankfy1	0.284973	0.00760344	0.442734	0.00859452
Pqlc3	-0.319468	0.00764261	-0.517877	0.0036147
St6galnac4	-0.296539	0.00782506	-0.577608	0.0097982
Fam134b	0.36992	0.00808993	0.705892	0.00176853
Lat2	-0.272045	0.00811755	-0.640233	0.00267217
Sdc3	-0.33864	0.00827463	0.396614	0.00580306
LOC100044204	-0.237565	0.00846901	-0.705207	0.00039096
Pacrg	-0.229045	0.00881088	-0.947008	0.00253404
Rhbdf1	-0.270347	0.00882794	-0.963829	1.81025e-05
Fkbp9	-0.214005	0.00919409	-0.982003	0.00123716
Rbm45	0.224377	0.00929964	2.05155	4.42219e-08
Aqp9	0.259846	0.0096176	1.11558	5.32153e-05
Ttc3	0.258186	0.00966966	-0.808897	0.000314491
Nagk	-0.311899	0.00967225	-0.622821	0.000958146
LOC667609	0.231271	0.00973393	0.51185	0.00329619
Stap1	0.378774	0.00994713	0.468647	0.00662678
