# Supplementary material for: Transcriptome Analysis of Genes Regulated by Cholesterol Loading in Two Strains of Mouse Macrophages Associates Lysosome Pathway and ER Stress Response with Atherosclerosis Susceptibility
Source: PLoS One. 2013 May 21;8(5):e65003. doi: 10.1371/journal.pone.0065003 (PMC3660362; doi:10.1371/journal.pone.0065003)
Supplement: Table S5 — Genes with a significant cholesterol loading effect in experiment 1 samples. The fold change after cholesterol loading is represented as the beta-coefficient for the fitted linear model. Positive log2 fold change, transcript expressed higher in response to cholesterol loading; negative log2 fold change, transcript expressed lower upon cholesterol loading. (XLS) [file pone.0065003.s007.xls]

## Sheet: Sheet1
Table S5: Genes with a significant cholesterol loading effect in experiment 1 samples
The fold change after cholesterol loading is represented as the beta-coefficient for the fitted linear model.
Positive log2 fold change, transcript expressed higher in response to cholesterol loading; negative log2 fold change, transcript expressed lower upon cholesterol loading.
Gene Symbol	Log2Fold Change	P.Value	FDR Adjusted P-Value
P2ry13	-2.78971	7.80132e-20	2.69368e-16
Clec4a3	-2.4587	8.67435e-20	2.69368e-16
Npy	2.11264	6.12578e-20	2.69368e-16
Ms4a6c	-2.34041	4.57159e-19	5.87519e-16
H2-Ab1	-2.32819	3.74188e-19	5.87519e-16
Hyal1	2.25821	5.6759e-19	5.87519e-16
Trib3	2.62011	5.12758e-19	5.87519e-16
Ppap2b	2.69274	4.924e-19	5.87519e-16
1810008K03Rik	2.93753	3.58087e-19	5.87519e-16
Ly6a	-2.18147	6.64515e-19	6.19062e-16
Gadd45a	1.84535	8.01979e-19	6.79204e-16
Scd1	2.21677	1.14963e-18	8.92494e-16
Rai14	1.72475	1.50849e-18	1.08101e-15
Gja1	-2.0272	1.89946e-18	1.26396e-15
1200006F02Rik	-1.78186	2.09678e-18	1.30224e-15
Hk3	1.81362	2.27071e-18	1.32212e-15
Slamf9	-2.43717	2.77116e-18	1.5186e-15
Slc6a8	1.81424	3.17254e-18	1.64197e-15
B130052G07Rik	1.63268	3.43945e-18	1.68642e-15
Asns	1.92663	3.79452e-18	1.76749e-15
Fpr1	-2.32702	4.94797e-18	2.19501e-15
Amica1	-1.95378	5.32013e-18	2.25283e-15
Siat10	-1.8426	6.43145e-18	2.49647e-15
Ahrr	-1.82988	6.25226e-18	2.49647e-15
Eno2	2.28446	7.42968e-18	2.7686e-15
Il7r	2.13804	8.24021e-18	2.95253e-15
Ssb4	2.09994	9.41122e-18	3.24722e-15
Tgfbi	-1.39523	1.60743e-17	5.34815e-15
Ch25h	-2.45604	2.21377e-17	7.11154e-15
Gpr65	-1.98863	4.70156e-17	1.33955e-14
2310044G17Rik	1.36307	4.74509e-17	1.33955e-14
Anpep	1.44244	4.32481e-17	1.33955e-14
Vwf	1.97339	4.53013e-17	1.33955e-14
F730004D16Rik	1.58359	5.46537e-17	1.49751e-14
Fcgr2b	-1.79242	1.18536e-16	3.15508e-14
Clecsf10	-1.42024	1.28603e-16	3.32796e-14
Gdf15	1.67628	1.3725e-16	3.45574e-14
Tlr2	-1.36687	1.98679e-16	4.87077e-14
Flrt2	1.82347	2.28782e-16	5.46496e-14
1810046I24Rik	-1.60784	2.64517e-16	6.1606e-14
Sesn1	-1.59751	3.18402e-16	7.23472e-14
BC004728	-1.54902	3.28095e-16	7.27747e-14
Adrb2	-1.24096	3.38518e-16	7.33404e-14
Abca9	-1.73702	3.6078e-16	7.6387e-14
Igfbp4	-1.47403	3.69543e-16	7.65035e-14
Msr2	-2.94854	3.83807e-16	7.77292e-14
BC049354	-1.76335	4.43419e-16	8.60602e-14
Neurl	-1.53084	4.42394e-16	8.60602e-14
P2ry14	-1.53643	5.21687e-16	9.91845e-14
Fpr-rs2	-1.66457	5.70324e-16	1.06263e-13
1810009M01Rik	-2.28584	6.41377e-16	1.17158e-13
Lrp12	1.50382	8.28944e-16	1.48509e-13
2310061N23Rik	-1.54882	8.5467e-16	1.50228e-13
Aif1	-1.87854	8.76789e-16	1.51262e-13
Wbscr5	1.37392	9.3536e-16	1.58433e-13
Slc6a9	1.4702	9.58827e-16	1.59508e-13
Pscdbp	-1.43127	1.01597e-15	1.66049e-13
Ii	-1.57466	1.10856e-15	1.78058e-13
P2ry6	-1.2622	1.16473e-15	1.83909e-13
Ifit3	-1.57316	1.20721e-15	1.8744e-13
Bhlhb2	1.51406	1.48611e-15	2.2696e-13
Coro1a	-1.39571	1.58209e-15	2.37722e-13
Sult1a1	-1.98487	1.7763e-15	2.60086e-13
Ms4a6b	-1.69842	1.78676e-15	2.60086e-13
Itpr3	1.34206	2.33142e-15	3.34146e-13
Il1b	-2.14006	2.58885e-15	3.65421e-13
Trex1	-1.44992	2.66884e-15	3.71089e-13
Dot1l	1.60952	2.80605e-15	3.84429e-13
Gpr18	-2.14108	3.55999e-15	4.6711e-13
Fgd2	-1.55316	3.53958e-15	4.6711e-13
Hsd3b7	1.12851	3.53492e-15	4.6711e-13
Rhov	1.57412	4.019e-15	5.14907e-13
Ppap2b	1.59604	4.0348e-15	5.14907e-13
Fcrl3	-1.08636	4.14267e-15	5.21528e-13
BC025833	1.31429	4.44017e-15	5.51528e-13
Ebi3	-1.4416	4.58951e-15	5.55272e-13
Dusp4	1.2678	4.53925e-15	5.55272e-13
Zfp36	-1.07245	4.7519e-15	5.67548e-13
Tgm2	1.33393	5.38581e-15	6.35116e-13
H2-Ea	-2.41937	5.62269e-15	6.54762e-13
Bcl2a1d	1.46697	5.78649e-15	6.65518e-13
Atf5	1.2265	5.88373e-15	6.68449e-13
Cbr2	-1.50235	6.23576e-15	6.99908e-13
Eif2c2	1.25601	6.51529e-15	7.22577e-13
2900024D24Rik	-1.32805	6.74738e-15	7.39513e-13
Tgfbi	-1.46006	7.1186e-15	7.71126e-13
Acpp	-1.32397	7.64137e-15	8.18241e-13
AI586015	-1.74317	7.73541e-15	8.18899e-13
Adam19	-1.78964	7.9062e-15	8.27575e-13
Mrc1	-1.20452	8.25996e-15	8.54997e-13
Igfbp4	-1.37917	8.48454e-15	8.68593e-13
Ctsc	-1.15044	8.80224e-15	8.91322e-13
Fh1	-1.69147	9.71642e-15	9.73314e-13
Tulp4	1.07588	1.08726e-14	1.07754e-12
Lst1	-1.43075	1.11656e-14	1.09493e-12
Lhfpl2	1.31509	1.36286e-14	1.32254e-12
Gpnmb	1.41153	1.42549e-14	1.36905e-12
AI481100	-1.10992	1.5022e-14	1.42801e-12
Tnfrsf12a	1.20513	1.60427e-14	1.49883e-12
Tnfaip3	1.37328	1.60887e-14	1.49883e-12
Rps6ka2	1.1159	1.73759e-14	1.60271e-12
0610011I04Rik	-1.95533	1.81278e-14	1.65567e-12
Msr2	-2.33426	1.83254e-14	1.65747e-12
Rgs11	1.39669	1.92413e-14	1.72358e-12
Ifit3	-1.64813	2.26316e-14	2.00797e-12
A630077B13Rik	-1.14437	2.37464e-14	2.087e-12
Plxna2	1.34683	2.65461e-14	2.31125e-12
Igf2r	1.37647	2.69154e-14	2.3217e-12
Rragd	1.13541	2.94733e-14	2.51736e-12
2310061F22Rik	1.27786	2.97241e-14	2.51736e-12
C530043K16Rik	1.83851	3.03799e-14	2.54972e-12
Trib3	1.09611	3.09314e-14	2.57283e-12
2610204M08Rik	1.04707	3.19104e-14	2.63077e-12
Cxcl13	-2.12486	3.43004e-14	2.7805e-12
Irak3	-1.27719	3.43235e-14	2.7805e-12
Padi2	1.10166	3.64228e-14	2.90995e-12
Tcirg1	1.2588	3.65462e-14	2.90995e-12
Gprc5b	1.49034	3.83797e-14	3.03004e-12
Cpeb1	1.07201	4.82059e-14	3.77384e-12
Bcl2a1b	1.41099	5.0602e-14	3.9284e-12
Emb	-1.24016	5.10724e-14	3.93215e-12
Cldn11	1.31004	5.19274e-14	3.96521e-12
Dok2	-1.00155	5.30136e-14	4.01524e-12
Clec4a3	-1.58926	5.65184e-14	4.24617e-12
Slc7a5	1.0301	5.84399e-14	4.35541e-12
Scd2	1.28576	6.18103e-14	4.57004e-12
A330066M24Rik	1.41239	6.68442e-14	4.90331e-12
Fasn	1.38676	7.52859e-14	5.4794e-12
2310046K10Rik	-1.20468	7.97019e-14	5.75584e-12
Mef2c	-1.2269	8.17809e-14	5.86055e-12
Daf1	-1.44728	8.54924e-14	6.07975e-12
9930117H01Rik	1.31902	8.98849e-14	6.34369e-12
Coro1a	-1.00109	1.09837e-13	7.69356e-12
Sqstm1	1.07643	1.12712e-13	7.82194e-12
Fcho1	1.20635	1.13349e-13	7.82194e-12
Htr2b	1.16438	1.37512e-13	9.41959e-12
Ctsk	1.29701	1.4126e-13	9.6057e-12
Ttc7b	0.915493	1.58231e-13	1.06817e-11
1700112C13Rik	1.79517	1.61149e-13	1.08005e-11
Treml1	1.19368	1.73503e-13	1.15454e-11
H2-Eb1	-1.60697	1.82189e-13	1.20374e-11
Hfe	-1.11742	1.86718e-13	1.22498e-11
4933421H10Rik	1.40596	2.10099e-13	1.36873e-11
Kif3a	1.22201	2.12224e-13	1.37297e-11
Ly86	-1.96498	2.16829e-13	1.38694e-11
Coro1a	-1.27445	2.17361e-13	1.38694e-11
Il10	-1.66964	2.20591e-13	1.39797e-11
Alcam	1.1563	2.26431e-13	1.42529e-11
Mif	1.00879	2.36575e-13	1.47915e-11
Cblb	1.45213	2.60491e-13	1.61782e-11
Marcks	-0.990737	2.63605e-13	1.62632e-11
9030625A04Rik	-1.06324	2.79816e-13	1.71498e-11
4631422O05Rik	-1.22366	2.94327e-13	1.79212e-11
Dio2	1.59515	3.06617e-13	1.85483e-11
Irf7	-1.23301	3.12083e-13	1.87572e-11
Ctla2b	-1.44092	3.40146e-13	2.03128e-11
Jun	1.0746	3.7901e-13	2.24895e-11
4833414E09Rik	1.36246	4.00652e-13	2.36233e-11
6330405H19	0.982438	4.11581e-13	2.4115e-11
2410011O22Rik	-1.03967	4.22929e-13	2.4625e-11
Bteb1	1.17095	4.28328e-13	2.47845e-11
Cd86	-1.12557	4.31742e-13	2.48278e-11
C1qg	-1.13579	4.53582e-13	2.59238e-11
Vps18	1.00196	5.44569e-13	3.09342e-11
Socs3	-1.10228	5.78346e-13	3.26538e-11
Emr1	-1.87527	5.97992e-13	3.33586e-11
Kpnb3	1.08186	5.94437e-13	3.33586e-11
Atp6v1c1	1.09764	6.19895e-13	3.43746e-11
Atf4	0.94998	6.24324e-13	3.44154e-11
Arhgap4	-0.975376	6.63501e-13	3.63599e-11
Arg1	2.58861	7.03878e-13	3.83469e-11
Cdkn1c	1.20605	7.51053e-13	4.06791e-11
Afg3l2	1.05536	7.56163e-13	4.07192e-11
Mthfd2	1.09604	7.75146e-13	4.15015e-11
Anxa3	0.875724	8.35763e-13	4.44912e-11
4933431N12Rik	1.03156	8.42534e-13	4.45969e-11
Slc27a1	1.04333	8.75361e-13	4.60727e-11
Mgl1	-1.34113	8.98045e-13	4.70011e-11
Mmd	-0.977544	9.12911e-13	4.75122e-11
Acsl1	0.960388	1.00509e-12	5.20191e-11
Ddit3	1.0445	1.11781e-12	5.75333e-11
Plekhm2	1.02935	1.13992e-12	5.83487e-11
Trf	-1.15699	1.16958e-12	5.92162e-11
Arfgef2	0.929599	1.16825e-12	5.92162e-11
9530020G05Rik	0.869128	1.34474e-12	6.77169e-11
Cysltr1	-1.19361	1.36807e-12	6.85211e-11
Aars	0.814304	1.41124e-12	7.03057e-11
Oas2	-1.00668	1.47285e-12	7.29843e-11
Ugt1a6	-0.893018	1.65362e-12	8.15088e-11
5830472M02Rik	-0.962727	1.81292e-12	8.88903e-11
Tes	0.924221	1.82938e-12	8.92277e-11
Lrpap1	0.764309	1.90805e-12	9.21005e-11
Ccrk	0.826343	1.90535e-12	9.21005e-11
1110032E23Rik	1.02503	1.97845e-12	9.50065e-11
B3galt3	-1.10109	2.01602e-12	9.58225e-11
BC013712	-1.09417	2.01361e-12	9.58225e-11
Lzp-s	-1.28524	2.0742e-12	9.80876e-11
C1qb	-1.12476	2.32443e-12	1.09365e-10
Wdr7	0.858078	2.36475e-12	1.10704e-10
BC062650	1.21182	2.40181e-12	1.11876e-10
Vat1	1.18142	2.44453e-12	1.133e-10
Ddx58	-1.02977	2.46401e-12	1.13637e-10
Hnrpdl	1.1381	2.65579e-12	1.21879e-10
Col18a1	0.902773	2.71566e-12	1.24015e-10
Dtx3	1.04447	2.85552e-12	1.29766e-10
Mlp	-0.989244	2.87395e-12	1.2997e-10
Rnase4	-1.25985	2.89959e-12	1.30496e-10
Sphk1	1.61708	3.01837e-12	1.35188e-10
Atp6v1c1	0.843733	3.06773e-12	1.3609e-10
Hal	0.913433	3.0644e-12	1.3609e-10
Ehd1	-1.03112	3.23717e-12	1.42926e-10
Stac2	1.02731	3.30418e-12	1.45197e-10
Pde1b	1.05725	3.44142e-12	1.50518e-10
Aurkb	-1.02619	3.52302e-12	1.53367e-10
Pik3cb	0.871612	3.63686e-12	1.57586e-10
Rnh1	0.838437	3.91367e-12	1.68795e-10
Ccl12	-1.18306	4.12016e-12	1.76882e-10
2210010N04Rik	1.55714	4.17744e-12	1.78519e-10
4921501M20Rik	-0.906366	4.2943e-12	1.82674e-10
Abcg1	0.749134	4.41122e-12	1.86795e-10
Rora	0.904742	5.15525e-12	2.17314e-10
Tnnc1	-0.780652	5.26592e-12	2.20979e-10
Fkbp11	0.861511	5.47288e-12	2.28634e-10
Tpi1	0.875942	5.61838e-12	2.33664e-10
Gas7	-0.854846	5.75348e-12	2.3822e-10
Aif1	-1.49886	5.80375e-12	2.39238e-10
Ccl12	-1.06179	5.88239e-12	2.41411e-10
Rnase6	-1.47263	6.16918e-12	2.52071e-10
Mefv	-0.924812	6.21424e-12	2.52803e-10
2410018G23Rik	-0.940128	6.41156e-12	2.58572e-10
2210413P12Rik	0.970902	6.40814e-12	2.58572e-10
6530401C20Rik	0.923897	6.48405e-12	2.59251e-10
2310006J04Rik	1.45594	6.47249e-12	2.59251e-10
Npn3	0.886573	6.64099e-12	2.64391e-10
Ccr5	-1.31759	6.94404e-12	2.75279e-10
Kctd12	-1.25678	7.06187e-12	2.77588e-10
Scotin	-0.884841	7.04582e-12	2.77588e-10
F630022B06Rik	-1.19147	7.34529e-12	2.87516e-10
Ell	0.757028	7.57913e-12	2.95427e-10
1500041B16Rik	1.17845	8.67401e-12	3.36696e-10
Ly6e	-1.10747	8.82741e-12	3.41229e-10
Scamp5	-1.01106	9.13085e-12	3.515e-10
Erdr1	1.14661	9.21996e-12	3.5347e-10
Ehd4	-0.783009	9.64844e-12	3.6838e-10
Gsta3	0.832685	9.82963e-12	3.73767e-10
9130404D14Rik	0.94109	1.03717e-11	3.92775e-10
Emr1	-1.25384	1.04319e-11	3.93457e-10
BC004044	0.979423	1.06173e-11	3.98835e-10
Mapk6	0.896996	1.10474e-11	4.13324e-10
4833444G19Rik	1.68964	1.1242e-11	4.18922e-10
2310016C08Rik	0.945603	1.14461e-11	4.2483e-10
Plk2	1.21072	1.17379e-11	4.33931e-10
1110017D15Rik	1.00576	1.18986e-11	4.38131e-10
Ugt1a9	-0.786075	1.19773e-11	4.39295e-10
C330012H03Rik	1.05545	1.20566e-11	4.40469e-10
Ndrg1	1.01451	1.24437e-11	4.52835e-10
LOC383540	-1.23849	1.25484e-11	4.54867e-10
6720425G15Rik	0.748618	1.31059e-11	4.69594e-10
Arhgap24	0.783751	1.30163e-11	4.69594e-10
Slc36a4	0.834815	1.30741e-11	4.69594e-10
Mtus1	-0.96011	1.32507e-11	4.72962e-10
Klhl6	-0.984692	1.33516e-11	4.74745e-10
Ifit2	-1.023	1.36234e-11	4.80741e-10
Erdr1	1.17331	1.36233e-11	4.80741e-10
Clm3	-1.02028	1.39158e-11	4.88236e-10
Evi2a	-0.825383	1.39406e-11	4.88236e-10
Ebi2	-1.22202	1.42035e-11	4.93862e-10
Sgpp1	-0.974123	1.42073e-11	4.93862e-10
Adfp	0.848303	1.50652e-11	5.21739e-10
BC025872	-0.955073	1.5741e-11	5.43125e-10
Rgl2	0.878432	1.63601e-11	5.62401e-10
Arhgap15	-0.731988	1.66263e-11	5.69452e-10
Fos	-1.13695	1.76005e-11	6.00609e-10
1810045K06Rik	0.813066	1.78251e-11	6.0166e-10
Psmd8	0.823923	1.77983e-11	6.0166e-10
Vegfb	0.829462	1.77905e-11	6.0166e-10
Slc2a1	0.833905	1.80278e-11	6.06307e-10
Ndrl	0.96638	1.81153e-11	6.07059e-10
Ptpn18	-0.724272	1.84598e-11	6.16386e-10
Fbxw7	1.00133	1.90367e-11	6.33377e-10
Slc9a9	-1.19312	1.97059e-11	6.52911e-10
Cars	0.838027	1.97639e-11	6.52911e-10
Ccnd3	-0.958886	1.9852e-11	6.53503e-10
4732481H14Rik	0.847465	1.9972e-11	6.55137e-10
Tnfrsf26	0.87759	2.19234e-11	7.16628e-10
Ltb4r1	-1.1807	2.20252e-11	7.17436e-10
Tnfaip2	1.00022	2.26286e-11	7.34523e-10
Unc5b	-0.823589	2.33937e-11	7.56722e-10
Uhrf1	-1.15999	2.35549e-11	7.59298e-10
AA407930	0.706721	2.38602e-11	7.66487e-10
BC003324	0.866483	2.49774e-11	7.9962e-10
B430110G05Rik	0.837071	2.54799e-11	8.12912e-10
Csad	-0.737959	2.63749e-11	8.38596e-10
Sars1	0.812996	2.65292e-11	8.40633e-10
Tmem24	0.763727	2.71422e-11	8.57143e-10
Tpcn2	0.922284	2.73785e-11	8.61683e-10
Prc1	-1.02881	2.88666e-11	9.05459e-10
Ephx1	-0.943453	2.92665e-11	9.14922e-10
Large	0.953969	3.27623e-11	1.02078e-09
Lrp1	0.988785	3.29214e-11	1.02232e-09
1500005J14Rik	-0.714157	3.32006e-11	1.02756e-09
Dck	-0.986262	3.39639e-11	1.04081e-09
P4ha2	0.857158	3.3904e-11	1.04081e-09
Hspa5bp1	0.955243	3.38665e-11	1.04081e-09
Opn3	-0.948916	3.41673e-11	1.04362e-09
Kif3a	1.05038	3.4553e-11	1.05195e-09
Inppl1	1.0391	3.48596e-11	1.05783e-09
Tm7sf1	0.879029	3.59033e-11	1.08596e-09
Cyp27a1	-0.916141	3.61187e-11	1.08894e-09
F10	1.28932	3.64383e-11	1.09503e-09
Gmfg	-0.952838	3.8341e-11	1.1485e-09
Cd84	0.861553	3.88795e-11	1.1609e-09
Avpi1	-0.790072	4.0129e-11	1.19438e-09
4930402H24Rik	0.791862	4.12651e-11	1.22429e-09
Oasl1	-0.852431	4.27435e-11	1.26412e-09
Ms4a6d	-0.918528	4.48643e-11	1.32265e-09
Plekhm1	0.777508	4.5242e-11	1.32957e-09
Il7r	1.25151	4.71347e-11	1.38084e-09
1600025D17Rik	-1.04873	4.91242e-11	1.43386e-09
Ugt1a10	-0.810556	4.92523e-11	1.43386e-09
Tlr8	-0.955597	5.12193e-11	1.48648e-09
LOC383540	-1.27978	5.18788e-11	1.50094e-09
Bcl2a1a	1.26582	5.24336e-11	1.5123e-09
Uap1l1	1.08834	5.3627e-11	1.54194e-09
2410195B05Rik	0.715181	5.46223e-11	1.56573e-09
Mdm2	0.833642	5.53309e-11	1.58117e-09
1700001C14Rik	0.759581	5.55142e-11	1.58156e-09
Bcl2l1	1.0302	5.76821e-11	1.63831e-09
Zfyve26	0.796282	6.12555e-11	1.73452e-09
Mbc2	0.782888	6.2301e-11	1.75878e-09
Gga2	0.654276	6.49316e-11	1.8275e-09
BC057079	0.868822	6.60126e-11	1.85233e-09
Numb	0.735637	7.01102e-11	1.9614e-09
Tcirg1	1.09352	7.07736e-11	1.97403e-09
Cd9	1.03792	7.37282e-11	2.0503e-09
Mcm5	-0.992594	7.58345e-11	2.1026e-09
Tlr7	-0.869371	8.00414e-11	2.20611e-09
Pkp4	0.952241	8.00286e-11	2.20611e-09
Cerk	0.814857	8.36419e-11	2.29855e-09
2510027N19Rik	-0.744703	8.49715e-11	2.32314e-09
Amid	0.709136	8.50354e-11	2.32314e-09
Il21r	-0.83007	8.61691e-11	2.34723e-09
Srrm2	1.05913	8.72834e-11	2.37065e-09
Sdccag33	0.89651	8.93265e-11	2.41701e-09
Pfkl	1.04539	8.95094e-11	2.41701e-09
Aacs	0.663059	9.03259e-11	2.43201e-09
Gpr68	0.918815	9.15094e-11	2.45678e-09
Gadd45g	0.883344	9.2079e-11	2.46497e-09
Gpnmb	0.945271	9.42309e-11	2.50826e-09
Rhobtb3	0.956707	9.42349e-11	2.50826e-09
6720458F09Rik	0.709641	9.48099e-11	2.51638e-09
Cd52	-1.23778	9.83283e-11	2.59576e-09
Dtnb	0.705678	9.8358e-11	2.59576e-09
Tes	0.851398	9.87393e-11	2.59846e-09
Egr1	-1.30071	1.02064e-10	2.67839e-09
Oas1g	-0.804085	1.06981e-10	2.79405e-09
Nedd4l	0.951323	1.07071e-10	2.79405e-09
Esd	0.823526	1.14007e-10	2.96673e-09
Lbr	-0.840267	1.14954e-10	2.98304e-09
Xdh	0.925925	1.15319e-10	2.9842e-09
Igtp	-0.752694	1.15707e-10	2.98594e-09
2610318I01Rik	-0.991425	1.18236e-10	3.04278e-09
Rap2c	-0.821944	1.20112e-10	3.08255e-09
Dscr1	0.679703	1.22104e-10	3.12507e-09
Dnchc1	0.911285	1.25166e-10	3.19465e-09
2310079N02Rik	-0.667569	1.26281e-10	3.20555e-09
Fem1b	0.71499	1.25983e-10	3.20555e-09
Myo10	0.88708	1.29622e-10	3.2814e-09
Cd86	-0.836022	1.33517e-10	3.37085e-09
2810417J12Rik	0.742325	1.37247e-10	3.45566e-09
Fcgrt	-1.22025	1.40457e-10	3.52694e-09
Ccnd1	-0.680653	1.45806e-10	3.65143e-09
BC019776	1.11037	1.49503e-10	3.73396e-09
4930431B09Rik	0.920898	1.50163e-10	3.74043e-09
Itgal	-0.724331	1.51046e-10	3.75239e-09
Myo10	0.796727	1.55032e-10	3.84117e-09
4930404N11Rik	0.789786	1.58328e-10	3.91243e-09
2610307O08Rik	-0.81599	1.59272e-10	3.92535e-09
Macf1	0.87813	1.65961e-10	4.0794e-09
Tnrc6	0.838488	1.73354e-10	4.24991e-09
Mtf2	0.686294	1.744e-10	4.26433e-09
Klf4	-0.766975	1.75972e-10	4.2915e-09
Spag9	0.807691	1.77403e-10	4.3151e-09
Slc6a12	0.836522	1.78452e-10	4.32933e-09
Nktr	0.766822	1.84074e-10	4.4541e-09
D17H6S56E-5	-0.854142	1.90591e-10	4.59987e-09
Sfrs2	0.723324	1.93841e-10	4.66621e-09
Dab2	-0.797159	1.94632e-10	4.67318e-09
Tuft1	0.697606	2.0334e-10	4.8697e-09
C5r1	-1.00843	2.08485e-10	4.98011e-09
Gpt1	0.70415	2.12211e-10	5.05616e-09
2410002F23Rik	0.776905	2.17132e-10	5.16021e-09
Idb2	0.96619	2.35597e-10	5.58478e-09
1200009I06Rik	1.00369	2.40693e-10	5.69111e-09
Ssbp2	-0.746223	2.42033e-10	5.70831e-09
Mmp2	-0.825171	2.46661e-10	5.80276e-09
BC003236	-0.628079	2.53923e-10	5.95855e-09
Emilin2	0.742212	2.63958e-10	6.17846e-09
D730049H07Rik	-0.732074	2.77372e-10	6.47618e-09
4930504E06Rik	0.69373	2.84226e-10	6.61962e-09
Hist1h4k	-1.05957	2.94644e-10	6.84514e-09
4933428I03Rik	-0.893951	2.98963e-10	6.91758e-09
Xylt1	0.90039	2.99972e-10	6.91758e-09
2010005H15Rik	1.90745	2.99989e-10	6.91758e-09
Dido1	0.867058	3.03418e-10	6.97937e-09
Cog3	0.741826	3.04751e-10	6.99276e-09
Arhgap24	1.12195	3.07325e-10	7.03449e-09
2610200G18Rik	0.786279	3.11512e-10	7.11286e-09
Ccl5	-0.947456	3.15199e-10	7.17944e-09
Tst	0.864905	3.2563e-10	7.39894e-09
Abr	0.755047	3.27041e-10	7.41292e-09
Phxr4	0.993859	3.29258e-10	7.44506e-09
Tmem20	-0.93386	3.36337e-10	7.58672e-09
2310021P13Rik	0.844677	3.40646e-10	7.66537e-09
Vamp4	0.770018	3.46742e-10	7.78373e-09
Gga2	0.645393	3.51514e-10	7.87189e-09
Snx2	-0.706343	3.53111e-10	7.88868e-09
Smpdl3b	-0.655551	3.60212e-10	8.02808e-09
AA175286	-0.669261	3.65429e-10	8.12491e-09
1700011A15Rik	0.837122	3.76033e-10	8.34077e-09
Pgm2	0.676982	3.85158e-10	8.52288e-09
Gdi3	-1.03637	3.88169e-10	8.56916e-09
Ddb1	0.632205	3.91387e-10	8.60772e-09
Arhgap10	0.801109	3.91764e-10	8.60772e-09
B430214A04Rik	0.614173	4.00656e-10	8.78239e-09
C3	-0.699556	4.03765e-10	8.82976e-09
Gab1	-0.772637	4.04797e-10	8.8316e-09
Hlx1	-0.868255	4.2241e-10	9.19433e-09
Pstpip2	-0.911657	4.2621e-10	9.25542e-09
Aqp9	0.783582	4.28571e-10	9.28503e-09
Snx7	0.759042	4.82781e-10	1.04352e-08
Ctsb	0.928451	4.88331e-10	1.05308e-08
Lrrc25	-0.85811	5.16297e-10	1.11081e-08
Laptm4a	-0.771154	5.31808e-10	1.14155e-08
4932408F19Rik	0.685016	5.33831e-10	1.14326e-08
P4ha1	0.791954	5.52797e-10	1.18116e-08
Trim25	0.833499	5.56875e-10	1.18715e-08
Mcm7	-0.693356	5.59003e-10	1.18897e-08
Nfkbiz	-1.06043	5.63186e-10	1.19513e-08
Pi4k2a	0.761691	5.72929e-10	1.21305e-08
C77032	0.864389	5.913e-10	1.2491e-08
Sfxn1	0.679352	5.9851e-10	1.26148e-08
Kmo	-0.876889	6.45982e-10	1.35846e-08
Ldh1	0.654019	6.48926e-10	1.36158e-08
Pdcd1lg1	0.710778	6.51676e-10	1.36427e-08
Drr1	0.704111	6.56774e-10	1.37186e-08
BC022687	0.938813	6.7904e-10	1.4152e-08
Ulk2	-0.614992	6.80923e-10	1.41596e-08
Ppt1	-0.739778	6.8965e-10	1.43091e-08
Gpr141	-0.912991	7.01725e-10	1.45273e-08
Gp49a	0.737182	7.04783e-10	1.45582e-08
Mdn1	0.712412	7.08223e-10	1.45969e-08
Galnt6	0.830841	7.13865e-10	1.46807e-08
4632428N05Rik	-0.936079	7.17733e-10	1.47278e-08
A430091O22Rik	-1.04024	7.26963e-10	1.48844e-08
Tmc6	0.649354	7.40226e-10	1.51227e-08
Ifi1	-0.668139	7.54537e-10	1.53477e-08
0610008A10Rik	0.923602	7.53774e-10	1.53477e-08
Hist1h4f	-0.929048	7.62631e-10	1.54786e-08
Fcgr1	-0.780697	7.84701e-10	1.58919e-08
Numb	0.926258	7.93067e-10	1.60265e-08
Lemd2	0.75576	8.11535e-10	1.63642e-08
Mef2c	-0.710472	8.28164e-10	1.66634e-08
Aatk	0.803664	8.34644e-10	1.67574e-08
Siat9	1.02092	8.36433e-10	1.67574e-08
Slco4a1	0.767215	8.40133e-10	1.67954e-08
Slc13a3	-1.38292	8.47598e-10	1.69084e-08
Cd97	-1.0239	8.86757e-10	1.76518e-08
2210013K02Rik	0.668803	8.9267e-10	1.77316e-08
Egr2	0.987052	9.0511e-10	1.79404e-08
C2ta	-0.888896	9.21731e-10	1.82311e-08
Thsd6	0.659874	9.67831e-10	1.91024e-08
Nagk	0.722358	9.73109e-10	1.91659e-08
2010107H07Rik	-0.609621	9.77819e-10	1.92181e-08
Spata13	-0.842701	9.91568e-10	1.94064e-08
5830407P18Rik	1.11491	9.90378e-10	1.94064e-08
Gch1	0.759862	1.00084e-09	1.95468e-08
Hipk2	1.25546	1.02663e-09	2.00086e-08
Selenbp1	-0.690556	1.03716e-09	2.01716e-08
Mlp	-1.02914	1.04913e-09	2.0362e-08
1700017I11Rik	-0.905875	1.07931e-09	2.09041e-08
C730049P21	0.828877	1.12024e-09	2.16519e-08
Zfp313	-0.762959	1.18111e-09	2.27545e-08
1110028E10Rik	0.613632	1.18218e-09	2.27545e-08
LOC432555	-0.583113	1.19707e-09	2.29935e-08
Tnfsf13b	-0.813358	1.20351e-09	2.30698e-08
2810405K07Rik	-0.667065	1.21079e-09	2.31616e-08
Srpk1	0.671037	1.26972e-09	2.42392e-08
2810441C07Rik	-0.707166	1.27822e-09	2.43019e-08
Sec61a2	0.639542	1.27802e-09	2.43019e-08
Alox5ap	-0.668309	1.30518e-09	2.47421e-08
Zdhhc8	0.667532	1.30669e-09	2.47421e-08
Gtpbp2	0.707138	1.3135e-09	2.48207e-08
Ndst1	0.93933	1.32425e-09	2.4973e-08
9030416H16Rik	0.667324	1.3484e-09	2.53772e-08
1600025D17Rik	-0.658589	1.36072e-09	2.55376e-08
1810009A16Rik	0.621311	1.36241e-09	2.55376e-08
Slco2b1	-1.11124	1.38753e-09	2.59564e-08
Pprc1	0.871769	1.42687e-09	2.66387e-08
Ilf3	0.624936	1.43909e-09	2.6813e-08
Rpo1-4	0.740035	1.44357e-09	2.68428e-08
1810019A08Rik	-0.715796	1.47734e-09	2.74161e-08
Por	0.853211	1.4832e-09	2.74701e-08
Zfp36l1	-0.749135	1.51236e-09	2.79547e-08
Naglu	0.685055	1.52441e-09	2.81215e-08
Ier3	-0.709558	1.53819e-09	2.83197e-08
Atad3a	0.607461	1.5466e-09	2.84184e-08
Lcp2	-1.03733	1.59048e-09	2.91671e-08
Actn4	0.784007	1.61161e-09	2.94965e-08
Trib3	0.832216	1.64391e-09	3.00288e-08
Gpr160	-0.859005	1.64935e-09	3.00691e-08
1500041I23Rik	0.803524	1.71217e-09	3.11535e-08
2310045A20Rik	0.959271	1.73772e-09	3.15568e-08
Golgb1	0.751902	1.74954e-09	3.17095e-08
Cugbp2	-0.709333	1.7803e-09	3.22044e-08
2410024A21Rik	0.59593	1.80488e-09	3.25857e-08
Iqgap1	0.685403	1.8163e-09	3.27285e-08
Ccrk	0.730565	1.83565e-09	3.30133e-08
Gpr85	-0.834847	1.90592e-09	3.42112e-08
BC019977	0.600106	1.93339e-09	3.46374e-08
Rac2	-0.681616	1.95365e-09	3.48597e-08
MGC6357	-0.66857	1.95702e-09	3.48597e-08
B4galt7	0.621367	1.9535e-09	3.48597e-08
B230312C02Rik	0.694992	1.99859e-09	3.55323e-08
AA673488	0.60108	2.01879e-09	3.58229e-08
2010315L10Rik	-0.681608	2.11379e-09	3.74374e-08
Ntan1	-0.592096	2.16585e-09	3.82867e-08
Egln3	1.09975	2.2346e-09	3.94272e-08
2900045N06Rik	0.739438	2.26071e-09	3.98125e-08
D330014H01Rik	-1.00318	2.3097e-09	4.05328e-08
Optn	0.755414	2.31032e-09	4.05328e-08
AL024069	-0.736811	2.33735e-09	4.08896e-08
Ica1	0.906224	2.33943e-09	4.08896e-08
Fgd6	0.66003	2.35014e-09	4.09998e-08
3732413I11Rik	0.739788	2.3987e-09	4.17688e-08
Ccnd1	-0.843921	2.41112e-09	4.19067e-08
Amotl1	0.738966	2.5223e-09	4.37575e-08
Tlr1	-0.807799	2.56093e-09	4.4345e-08
Obrgrp	-0.595388	2.64423e-09	4.57026e-08
BC006933	0.638813	2.66562e-09	4.59868e-08
Slc1a4	0.59767	2.67418e-09	4.60492e-08
Zfp295	0.745183	2.68585e-09	4.6165e-08
BC027342	0.622653	2.70226e-09	4.63614e-08
Tk1	-0.977657	2.74128e-09	4.69444e-08
Col4a3bp	0.587307	2.79257e-09	4.77351e-08
Ticam2	-0.599663	2.80534e-09	4.78654e-08
Slc7a4	0.699016	2.86161e-09	4.87363e-08
2310046K10Rik	-0.855002	2.87545e-09	4.88827e-08
Junb	-0.952084	2.88744e-09	4.89497e-08
Clp1	-0.719771	2.90032e-09	4.89497e-08
Mgmt	-0.639798	2.90513e-09	4.89497e-08
Ube2d2	-0.545234	2.89552e-09	4.89497e-08
2310007A19Rik	0.811494	2.90567e-09	4.89497e-08
Soat2	0.804965	2.9146e-09	4.90116e-08
Gig1	0.652604	2.93609e-09	4.92841e-08
Slc9a1	0.733374	3.00998e-09	5.04334e-08
Celsr3	0.839968	3.03084e-09	5.06917e-08
Bat2	0.656934	3.14227e-09	5.24613e-08
Lbh	-0.697566	3.17495e-09	5.2912e-08
D8Ertd354e	-0.858693	3.19623e-09	5.31716e-08
Swap70	-0.574325	3.2642e-09	5.42055e-08
Csf1r	-0.981129	3.27699e-09	5.43211e-08
Zfp288	0.608876	3.30413e-09	5.46736e-08
Lzts2	0.653502	3.31173e-09	5.47023e-08
4933421G18Rik	0.662282	3.38022e-09	5.57347e-08
Ctsc	-0.860222	3.43123e-09	5.64758e-08
0710001P09Rik	0.711999	3.45954e-09	5.68414e-08
Ppfia1	0.702276	3.50456e-09	5.74798e-08
Pkig	-0.582031	3.51532e-09	5.75548e-08
Cdc2a	-0.867128	3.58595e-09	5.86082e-08
BC035295	0.611826	3.63093e-09	5.9136e-08
Csf2rb2	0.657845	3.62843e-09	5.9136e-08
Il6ra	-0.639292	3.81625e-09	6.20457e-08
Snx7	0.673904	3.83751e-09	6.22827e-08
Akap9	0.754319	3.86382e-09	6.26006e-08
Mx2	-0.625477	3.88134e-09	6.2637e-08
Centg2	0.806769	3.87477e-09	6.2637e-08
2210417D09Rik	0.815229	3.88624e-09	6.2637e-08
Catnb	0.766832	3.94921e-09	6.35421e-08
Ndst2	0.635209	4.25053e-09	6.82724e-08
Cln5	0.565996	4.26398e-09	6.83704e-08
Hsp105	0.706533	4.31037e-09	6.89955e-08
Slc38a2	0.827578	4.32811e-09	6.91607e-08
1110059F07Rik	0.569117	4.47281e-09	7.121e-08
Dgkz	0.77668	4.47929e-09	7.121e-08
A930014K01Rik	0.800679	4.46456e-09	7.121e-08
Clecsf5	-0.708753	4.49282e-09	7.13034e-08
Unc84a	0.559152	4.51858e-09	7.15903e-08
Sgpl1	0.713987	4.52962e-09	7.16433e-08
Sipa1l1	-0.701231	4.6107e-09	7.28022e-08
Rabgef1	0.561943	4.78022e-09	7.53512e-08
Psen2	0.561519	4.7929e-09	7.54234e-08
Gpr109b	-0.773838	4.84296e-09	7.60826e-08
Uhrf2	0.538301	4.85906e-09	7.62072e-08
Ctse	-0.738927	4.91317e-09	7.69262e-08
1810031K02Rik	-0.689589	5.00806e-09	7.82803e-08
Rars	0.577822	5.02686e-09	7.84425e-08
Nap1l1	-0.82254	5.09588e-09	7.93867e-08
Agpat3	-0.629137	5.17607e-09	8.05013e-08
Ltc4s	-0.768001	5.20249e-09	8.07773e-08
Il16	-0.691657	5.49632e-09	8.51656e-08
Hyal2	0.687827	5.5034e-09	8.51656e-08
Fignl1	-0.661378	5.51479e-09	8.52003e-08
Zfp292	0.636144	5.65374e-09	8.72023e-08
Rab4a	0.528596	5.68712e-09	8.75723e-08
Mbnl1	-0.651688	5.74751e-09	8.83562e-08
Myd116	0.841323	5.79662e-09	8.89643e-08
E030041M21Rik	0.696906	5.83256e-09	8.93687e-08
Tnfrsf22	0.655117	5.8741e-09	8.98574e-08
BC027057	-0.705368	5.95818e-09	9.0994e-08
Marco	-0.783025	5.97534e-09	9.11069e-08
H2-DMb2	-0.801695	6.07278e-09	9.24412e-08
Gars	0.568666	6.13531e-09	9.32407e-08
Cdc42bpb	0.859855	6.28748e-09	9.52426e-08
Ak4	0.943737	6.28668e-09	9.52426e-08
BC023741	-0.688482	6.3866e-09	9.6587e-08
Irak2	0.646653	6.5318e-09	9.86227e-08
Psmb6	0.568957	6.64425e-09	1.00158e-07
Map3k12	0.73753	6.68699e-09	1.0064e-07
Hprt	-0.683093	6.71941e-09	1.00965e-07
Mir16	0.558132	6.76547e-09	1.01493e-07
Snapc4	0.716029	6.8053e-09	1.01926e-07
Phemx	-0.718598	6.89498e-09	1.03104e-07
2610007K22Rik	0.58516	6.92732e-09	1.03421e-07
Cnn2	-0.698014	6.94745e-09	1.03556e-07
Ccng1	-0.754169	7.00535e-09	1.04198e-07
Cd109	0.669609	7.02406e-09	1.04198e-07
Actl6a	0.708877	7.01552e-09	1.04198e-07
6030411F23Rik	-0.734616	7.04634e-09	1.04362e-07
Lims2	0.625347	7.08634e-09	1.04788e-07
Nme4	-0.726427	7.12488e-09	1.04858e-07
BB128963	0.602355	7.1247e-09	1.04858e-07
Mrgpre	0.745524	7.10778e-09	1.04858e-07
Tcirg1	0.957618	7.18179e-09	1.05529e-07
Ppan	0.565261	7.21788e-09	1.05892e-07
Hip1	0.615442	7.26889e-09	1.06306e-07
BC065120	0.792011	7.26084e-09	1.06306e-07
AA691260	0.576194	7.36696e-09	1.07572e-07
Npn3	0.657703	7.50175e-09	1.09368e-07
Tec	0.529028	7.67649e-09	1.11601e-07
2410195B05Rik	0.638374	7.67888e-09	1.11601e-07
Psmb10	-0.595399	7.81801e-09	1.13446e-07
1110015K06Rik	0.574496	7.86869e-09	1.14004e-07
Fabp5	0.706211	7.93578e-09	1.14798e-07
Tctex1	-0.687957	8.21283e-09	1.18621e-07
Hist1h4d	-0.790626	8.24438e-09	1.18893e-07
B930093C12Rik	0.643725	8.30567e-09	1.19591e-07
Plec1	0.720522	8.32195e-09	1.19641e-07
Ptpn23	0.789965	8.63824e-09	1.23997e-07
Gpr73	0.672577	8.93047e-09	1.27994e-07
Sod1	-0.583501	9.06208e-09	1.29482e-07
D9Ertd392e	-0.576633	9.06158e-09	1.29482e-07
Papd4	-0.536735	9.0978e-09	1.29793e-07
Gmfg	-0.868604	9.14158e-09	1.30219e-07
Ltb	-0.790226	9.45157e-09	1.34429e-07
Rragc	0.651026	9.63254e-09	1.36794e-07
Prkr	-0.634252	9.65513e-09	1.36877e-07
Mast2	0.708026	9.6678e-09	1.36877e-07
Hk2	0.737247	9.69809e-09	1.37098e-07
Dgkq	0.562935	9.81318e-09	1.38515e-07
Slc31a1	-0.846868	9.9058e-09	1.3961e-07
A930021H16Rik	0.544337	1.0019e-08	1.40993e-07
AW548124	0.697061	1.00997e-08	1.41913e-07
Tnfrsf6	-0.683696	1.02521e-08	1.43838e-07
H2-Bf	-0.754971	1.04886e-08	1.46935e-07
Smox	-0.767982	1.05707e-08	1.47863e-07
Tjp2	0.739761	1.08552e-08	1.51615e-07
Clecsf9	0.679585	1.1027e-08	1.53783e-07
Hbs1l	0.618143	1.11655e-08	1.55482e-07
Ivns1abp	-0.733064	1.12194e-08	1.56e-07
D5Ertd110e	-0.640184	1.12902e-08	1.56751e-07
Map2k5	0.633707	1.14726e-08	1.59045e-07
4932415G12Rik	-0.634631	1.14988e-08	1.59171e-07
Cklfsf7	-0.552546	1.15221e-08	1.59257e-07
Lzp-s	-0.870988	1.17378e-08	1.61999e-07
scl0002644.1_1164	0.596348	1.18251e-08	1.62963e-07
Cables1	-0.688616	1.19902e-08	1.64994e-07
Csf1r	-0.748576	1.2057e-08	1.65668e-07
Nte	0.63405	1.21556e-08	1.66776e-07
Gpx1	0.791721	1.22038e-08	1.67192e-07
Arhgap22	0.725335	1.24458e-08	1.70257e-07
BC021381	0.691253	1.24838e-08	1.70527e-07
4930583H14Rik	0.795223	1.25382e-08	1.71018e-07
Irf1	-0.721275	1.27268e-08	1.73337e-07
BC033596	0.604724	1.27782e-08	1.73784e-07
Arhgap15	-0.746761	1.28358e-08	1.74313e-07
Ank	-0.748128	1.29575e-08	1.75709e-07
Cav2	-0.557682	1.30722e-08	1.77007e-07
Nrm	-0.709413	1.31086e-08	1.77242e-07
AW046396	-1.36589	1.32791e-08	1.79288e-07
E330018D03Rik	0.752489	1.33574e-08	1.80083e-07
Pald	-0.868278	1.33862e-08	1.80211e-07
Glg1	0.682933	1.36647e-08	1.83694e-07
Pip5k2c	0.493326	1.38318e-08	1.85674e-07
Sypl	-0.545826	1.40404e-08	1.88202e-07
Wdr9	0.559172	1.41249e-08	1.89063e-07
Lyzs	-0.675157	1.44562e-08	1.9322e-07
D6Ertd349e	0.680196	1.45878e-08	1.94699e-07
Il6ra	-0.673904	1.46935e-08	1.95829e-07
1700054N08Rik	0.615826	1.4787e-08	1.96794e-07
Cd79b	-0.68916	1.48801e-08	1.9775e-07
Sgk3	-0.524433	1.51534e-08	2.01095e-07
Mlp	-0.781147	1.52314e-08	2.01843e-07
Rgs10	-0.656452	1.53348e-08	2.0254e-07
Smad1	-0.572856	1.53185e-08	2.0254e-07
Adssl1	0.588078	1.53528e-08	2.0254e-07
Cdk8	0.6579	1.5371e-08	2.0254e-07
Rin2	-0.694519	1.54236e-08	2.02947e-07
Gnptab	0.585002	1.5597e-08	2.04362e-07
Txnrd3	0.624469	1.55609e-08	2.04362e-07
Hmox1	0.680463	1.55931e-08	2.04362e-07
Hspa5bp1	0.744048	1.57684e-08	2.06318e-07
Chd8	0.54367	1.59302e-08	2.08143e-07
2810455F06Rik	0.604883	1.60181e-08	2.08998e-07
E130307J07Rik	0.660754	1.62264e-08	2.1142e-07
Nusap1	-0.72666	1.62924e-08	2.11983e-07
Fbxo32	0.658289	1.6403e-08	2.13125e-07
Actn4	0.68547	1.65614e-08	2.14883e-07
Clk2	0.55286	1.66776e-08	2.1609e-07
Adprtl3	0.625957	1.67807e-08	2.17124e-07
Clecsf9	0.842179	1.70364e-08	2.20126e-07
Silg111	0.671395	1.73923e-08	2.24414e-07
Myo9b	0.620083	1.75549e-08	2.26198e-07
Ddx55	0.723899	1.76109e-08	2.26606e-07
Gpsm3	-0.529301	1.76976e-08	2.27408e-07
Cst3	-0.525162	1.78604e-08	2.29183e-07
Oasl2	-0.7302	1.78962e-08	2.29327e-07
Atp2a3	0.699	1.80686e-08	2.3097e-07
E130113K22Rik	0.736717	1.8074e-08	2.3097e-07
2310020F24Rik	-0.631096	1.85195e-08	2.36339e-07
Asb2	-0.783036	1.88947e-08	2.40468e-07
Gm1012	0.625825	1.8875e-08	2.40468e-07
Irf2	-0.541377	1.89458e-08	2.4079e-07
2810403A07Rik	0.577529	1.90669e-08	2.41999e-07
AW555464	0.543573	1.92043e-08	2.43411e-07
9530090G24Rik	0.53352	1.93457e-08	2.4487e-07
Mafg	0.600788	1.95612e-08	2.47263e-07
Rpl23	-0.717064	1.96603e-08	2.47842e-07
Myo9b	0.673671	1.96354e-08	2.47842e-07
Lip1	0.805983	1.98481e-08	2.49871e-07
Eps15	-0.571332	2.02536e-08	2.5441e-07
Sfrs14	0.579746	2.02633e-08	2.5441e-07
2210409M21Rik	-0.524123	2.05111e-08	2.57176e-07
Ccnd1	-0.770534	2.07426e-08	2.59729e-07
Lcn2	-0.618401	2.08393e-08	2.6059e-07
BC026370	0.562411	2.10872e-08	2.63335e-07
Mfge8	0.629732	2.11206e-08	2.634e-07
AU042671	0.575754	2.14859e-08	2.67597e-07
Ppp1r12a	0.621142	2.20664e-08	2.7446e-07
5430411K18Rik	0.580447	2.2339e-08	2.7748e-07
Ptk9l	-0.615654	2.24454e-08	2.7843e-07
5630401D24Rik	0.49342	2.36199e-08	2.92611e-07
Bcl2	0.673896	2.40476e-08	2.97513e-07
Agpt2	0.729621	2.46281e-08	3.0429e-07
D230007K08Rik	0.706957	2.47215e-08	3.05041e-07
Napsa	-0.544887	2.49993e-08	3.0806e-07
AW540478	0.532484	2.52207e-08	3.10378e-07
Il18	-0.648821	2.55754e-08	3.13914e-07
Eif4g1	0.776684	2.55545e-08	3.13914e-07
Slc20a2	0.574483	2.56541e-08	3.14466e-07
Tram1	-0.605238	2.58945e-08	3.16995e-07
Rnf128	0.634986	2.6367e-08	3.22356e-07
Chst7	-0.912855	2.66228e-08	3.25056e-07
Ms4a6d	-0.77294	2.70909e-08	3.30338e-07
Trip12	0.588349	2.7245e-08	3.31784e-07
Ccl3	0.810491	2.74325e-08	3.3363e-07
Stk11ip	0.645228	2.76131e-08	3.3539e-07
Zfp36l1	-0.764354	2.7957e-08	3.38958e-07
Swap70	-0.551402	2.79797e-08	3.38958e-07
Arl11	0.571453	2.82206e-08	3.41432e-07
Comtd1	0.643848	2.85634e-08	3.45132e-07
Pgk1	0.663518	2.89037e-08	3.48792e-07
Tyki	-0.591561	2.91052e-08	3.50498e-07
Adamts1	0.689932	2.91204e-08	3.50498e-07
Rpo2tc1	-0.571931	3.02496e-08	3.6362e-07
4921528G01Rik	-0.687512	3.04324e-08	3.65346e-07
Mapk14	-0.485068	3.04825e-08	3.65476e-07
Pgbpll	0.635826	3.11119e-08	3.72543e-07
Qscn6	-0.826285	3.13344e-08	3.74612e-07
BC019560	0.704193	3.13651e-08	3.74612e-07
Hprt	-0.750466	3.14219e-08	3.7463e-07
Renbp	0.557369	3.14471e-08	3.7463e-07
Man1a	-0.674282	3.15892e-08	3.75842e-07
Zyx	-0.597766	3.16886e-08	3.76064e-07
3110001D03Rik	-0.581876	3.16614e-08	3.76064e-07
2010316F05Rik	-0.693769	3.2088e-08	3.80111e-07
C330002I19Rik	0.687253	3.21112e-08	3.80111e-07
Snca	0.635648	3.25859e-08	3.85241e-07
Cpeb2	0.658467	3.26541e-08	3.85558e-07
Slc2a9	-0.549157	3.32558e-08	3.92166e-07
Selenbp2	-0.66718	3.43089e-08	4.04073e-07
Chi3l1	-0.531104	3.52704e-08	4.1435e-07
Ptk2b	0.600209	3.52575e-08	4.1435e-07
E330018D03Rik	0.651339	3.55283e-08	4.16854e-07
9830147J24Rik	-0.595264	3.66404e-08	4.29361e-07
Pfkfb3	0.604199	3.72976e-08	4.36513e-07
Axl	-0.90985	3.73687e-08	4.36797e-07
C230093N12Rik	0.646481	3.76606e-08	4.39657e-07
Igbp1	-0.599547	3.77083e-08	4.39663e-07
A930008A22Rik	0.656899	3.79089e-08	4.41449e-07
2700060E02Rik	-0.590559	3.95101e-08	4.59521e-07
4932414K18Rik	0.53136	3.97046e-08	4.61207e-07
Myo1e	0.736381	4.00451e-08	4.64583e-07
Cd28	-0.908733	4.05116e-08	4.68904e-07
Prss15	0.577961	4.05182e-08	4.68904e-07
2210013M04Rik	0.714388	4.08853e-08	4.72565e-07
Tln1	0.638698	4.10944e-08	4.74393e-07
Cpd	0.670574	4.12337e-08	4.74824e-07
Mdk	0.693311	4.1205e-08	4.74824e-07
Abca9	-0.740713	4.14277e-08	4.76469e-07
Sphk2	0.584489	4.19756e-08	4.82176e-07
Tollip	0.551319	4.28462e-08	4.90394e-07
Lrrfip2	0.619112	4.27801e-08	4.90394e-07
AI606181	0.652223	4.28489e-08	4.90394e-07
Dp1	-0.605531	4.32338e-08	4.94191e-07
Rpl27a	-0.51801	4.37645e-08	4.99645e-07
Anln	-0.685442	4.44786e-08	5.07175e-07
BC023835	-0.566611	4.45681e-08	5.07575e-07
E130209G04Rik	0.581836	4.4809e-08	5.09696e-07
Dia1	0.511378	4.55781e-08	5.17811e-07
Pdgfa	0.567266	4.60465e-08	5.22496e-07
Ogt	0.636846	4.61195e-08	5.22687e-07
Hist1h4m	-0.809404	4.65507e-08	5.26934e-07
Pip5k1b	0.557319	4.72991e-08	5.34755e-07
Clcn3	0.528974	4.8043e-08	5.42507e-07
Tada2l	0.500308	4.85701e-08	5.47795e-07
Isgf3g	-0.61329	4.91752e-08	5.53949e-07
Slc5a3	0.722233	5.01478e-08	5.64223e-07
Il11ra1	0.529741	5.10592e-08	5.73784e-07
Btbd12	0.547681	5.1922e-08	5.82778e-07
LOC629605	-0.495459	5.23931e-08	5.86652e-07
Leng9	-0.452027	5.23493e-08	5.86652e-07
Nav1	0.580402	5.25523e-08	5.87727e-07
Scn1b	-0.654141	5.28988e-08	5.90894e-07
Elk3	-0.533427	5.42903e-08	6.05711e-07
Acaca	-0.455357	5.46381e-08	6.08862e-07
Rab24	0.507099	5.4886e-08	6.10894e-07
Cept1	-0.675927	5.57892e-08	6.20205e-07
Nfat5	0.56432	5.6008e-08	6.21896e-07
2410042D21Rik	0.55847	5.67872e-08	6.29797e-07
L259	-0.665447	5.76811e-08	6.38951e-07
Snx16	0.545509	5.78223e-08	6.39754e-07
AI315068	0.545154	5.79042e-08	6.399e-07
Prkra	-0.511113	5.8773e-08	6.48731e-07
Creld1	0.570416	5.92344e-08	6.53051e-07
D5Ertd110e	-0.494247	5.94148e-08	6.54265e-07
Nup62	0.662008	5.99376e-08	6.59243e-07
1810055E12Rik	-0.606226	6.02046e-08	6.61399e-07
Tk1	-0.750531	6.03589e-08	6.62313e-07
Hist1h4a	-0.804968	6.14898e-08	6.73928e-07
Fut7	-0.542346	6.20928e-08	6.79737e-07
Ctsz	0.485851	6.22534e-08	6.80695e-07
Adam17	-0.650728	6.55299e-08	7.15681e-07
Dscr1	0.582113	6.58599e-08	7.18444e-07
Psat1	0.573865	6.63119e-08	7.22528e-07
Hist1h4j	-0.727532	6.6737e-08	7.26311e-07
Zfp292	0.667203	6.7149e-08	7.29942e-07
Cd14	-0.565301	6.8009e-08	7.38429e-07
Mir16	0.518198	6.83301e-08	7.41051e-07
Sqle	0.662818	6.92906e-08	7.50595e-07
Arl12	-0.599825	6.93738e-08	7.50623e-07
BC003281	-0.518753	7.01829e-08	7.58496e-07
Slfn2	-0.57783	7.06053e-08	7.62177e-07
2210018M11Rik	0.647216	7.0882e-08	7.64278e-07
Tgfbr2	-0.475288	7.10789e-08	7.65516e-07
Gtf2h1	0.516687	7.14121e-08	7.68216e-07
D2Ertd391e	0.56064	7.1841e-08	7.71939e-07
Sik2	0.57716	7.29082e-08	7.82503e-07
Stat1	-0.459879	7.33783e-08	7.86643e-07
2400010D15Rik	0.618953	7.35573e-08	7.87655e-07
Scn1b	-0.779669	7.45712e-08	7.97595e-07
Atf4	0.744892	7.46964e-08	7.98018e-07
5930416I19Rik	0.494599	7.56321e-08	8.07089e-07
Bzrp	-0.538494	7.78624e-08	8.29938e-07
2410016O06Rik	0.562782	7.83719e-08	8.34414e-07
H2-DMa	-0.773017	7.9197e-08	8.42236e-07
Apobec1	0.602074	8.07886e-08	8.58183e-07
Angptl4	-0.862546	8.11383e-08	8.60917e-07
Slc3a2	0.946608	8.20167e-08	8.69246e-07
C630002B14Rik	0.508307	8.21393e-08	8.69556e-07
Oas1g	-0.74655	8.24243e-08	8.71584e-07
Sars1	0.680071	8.27576e-08	8.74116e-07
Ifi205	-0.689519	8.45529e-08	8.92067e-07
Rpa2	-0.585391	8.58892e-08	9.0514e-07
AF322649	0.483954	8.68851e-08	9.14601e-07
Casp2	-0.494781	8.71446e-08	9.16297e-07
Snap23	-0.542721	8.837e-08	9.28134e-07
1300010F03Rik	0.515986	8.86137e-08	9.29645e-07
Farsla	0.581682	8.99602e-08	9.4271e-07
Rbm5	0.600748	9.42469e-08	9.86522e-07
H2-T24	-0.70133	9.47415e-08	9.90586e-07
Adcy2	0.504337	9.60058e-08	1.00156e-06
Cugbp1	0.552525	9.59446e-08	1.00156e-06
2810037C03Rik	-0.449529	9.74312e-08	1.01529e-06
Ndg2	0.461022	9.7927e-08	1.01874e-06
Lat	0.554935	9.80183e-08	1.01874e-06
Cln8	0.617883	9.80902e-08	1.01874e-06
Ankmy2	0.506032	1.00441e-07	1.04199e-06
Ivd	-0.518908	1.01999e-07	1.05698e-06
2810405K02Rik	-0.531551	1.02183e-07	1.0577e-06
Foxn2	0.587331	1.03162e-07	1.06666e-06
Slc20a1	0.615926	1.03454e-07	1.06849e-06
2510015F01Rik	-0.590644	1.03884e-07	1.07174e-06
Tpcn1	-0.559852	1.05227e-07	1.08439e-06
Fyb	-0.776659	1.05834e-07	1.0852e-06
Lrmp	-0.541542	1.05874e-07	1.0852e-06
Sgk3	-0.538665	1.05839e-07	1.0852e-06
H2afy	-0.478207	1.05887e-07	1.0852e-06
Iap	0.489667	1.05478e-07	1.0852e-06
Taf1c	0.516118	1.06419e-07	1.08945e-06
Trim56	0.643	1.08781e-07	1.1124e-06
Etv1	0.785207	1.09765e-07	1.12124e-06
Tgfbr2	-0.601296	1.10317e-07	1.12437e-06
Rin3	-0.551721	1.10433e-07	1.12437e-06
Myst4	0.594397	1.10317e-07	1.12437e-06
Hic2	0.60951	1.11159e-07	1.13052e-06
Lims2	0.46176	1.12166e-07	1.13952e-06
Ube2l6	-0.566257	1.13166e-07	1.14842e-06
Grcc10	-0.494183	1.15934e-07	1.17396e-06
Snx24	0.525609	1.15816e-07	1.17396e-06
Frag1	-0.514742	1.20258e-07	1.21642e-06
5830446M03Rik	-0.488674	1.21093e-07	1.22354e-06
1110049F12Rik	-0.606787	1.21341e-07	1.22472e-06
Isgf3g	-0.819685	1.21777e-07	1.22779e-06
Chst1	0.624647	1.22092e-07	1.22963e-06
Gjb4	-0.482815	1.23244e-07	1.23989e-06
0610025L06Rik	-0.544633	1.23863e-07	1.24465e-06
Lzf	-0.541896	1.24118e-07	1.24465e-06
Atp6v0b	0.49468	1.24062e-07	1.24465e-06
E030003N15Rik	0.568023	1.25648e-07	1.25864e-06
Ssbp2	-0.493637	1.26843e-07	1.26925e-06
Dok3	-0.496571	1.27662e-07	1.27607e-06
Rbpms	0.552705	1.28512e-07	1.28319e-06
Ttc14	0.631277	1.30819e-07	1.30483e-06
Slc13a2	-0.570317	1.31923e-07	1.31443e-06
H3f3a	-0.675688	1.32282e-07	1.31519e-06
Hist1h4c	-0.599965	1.32246e-07	1.31519e-06
Grhpr	0.49725	1.34476e-07	1.33559e-06
Tpst1	-0.486516	1.34734e-07	1.33672e-06
BC022641	0.536896	1.35871e-07	1.34657e-06
Mdh1	-0.693203	1.36815e-07	1.35344e-06
D12Wsu95e	0.528593	1.36855e-07	1.35344e-06
Rgs18	-0.629104	1.37898e-07	1.36231e-06
Gpx4	0.473228	1.42705e-07	1.40831e-06
Sdfr2	0.60785	1.44756e-07	1.42704e-06
BC039093	-0.482213	1.45259e-07	1.43048e-06
Sepp1	-0.760873	1.4795e-07	1.45395e-06
Thap7	0.513771	1.47955e-07	1.45395e-06
Sms	0.726175	1.48606e-07	1.45881e-06
Myd88	-0.573008	1.49016e-07	1.4613e-06
Dcxr	-0.553028	1.49598e-07	1.46547e-06
Usp20	0.484232	1.52027e-07	1.4877e-06
Hdh	0.55248	1.52471e-07	1.49047e-06
Hcls1	-0.576021	1.56113e-07	1.52447e-06
Ifitm2	-0.528125	1.56485e-07	1.52582e-06
Gla	0.685213	1.56578e-07	1.52582e-06
Slc17a5	0.566993	1.57239e-07	1.53066e-06
Plek	0.70755	1.58625e-07	1.54254e-06
Pnp	-0.527807	1.59164e-07	1.54617e-06
Usp18	-0.537661	1.59377e-07	1.54663e-06
AI316787	0.445478	1.62376e-07	1.57408e-06
AU024582	0.596298	1.62741e-07	1.57598e-06
Cklfsf6	-0.492729	1.64359e-07	1.59e-06
2810429O05Rik	-0.617463	1.68488e-07	1.62825e-06
Slc11a1	-0.528758	1.70005e-07	1.64121e-06
Tnrc11	0.520772	1.70264e-07	1.642e-06
Lgals3bp	-0.591636	1.71247e-07	1.64978e-06
Mmrp19	-0.494584	1.73386e-07	1.66866e-06
B230380D07Rik	0.643095	1.74526e-07	1.6779e-06
Asph	0.522903	1.77148e-07	1.70135e-06
Idh3g	-0.575161	1.79839e-07	1.72542e-06
Hira	0.492771	1.82612e-07	1.75022e-06
AA536743	0.464204	1.83144e-07	1.75351e-06
1110028E10Rik	0.532016	1.85311e-07	1.77244e-06
Dab2ip	0.510479	1.85502e-07	1.77245e-06
Rpl22	-0.626567	1.86186e-07	1.77716e-06
Nfe2l1	0.457316	1.89374e-07	1.80574e-06
Pla2g12a	0.492914	1.89684e-07	1.80685e-06
Aldoc	0.520837	1.91337e-07	1.82073e-06
Rab3d	-0.548682	1.92861e-07	1.83336e-06
Zhx1	-0.542988	1.95734e-07	1.85833e-06
Tnfrsf22	0.53527	1.95886e-07	1.85833e-06
Hbp1	0.455172	1.96101e-07	1.85847e-06
Clcn3	0.504882	1.96882e-07	1.86398e-06
2010003I19Rik	-0.56541	1.98569e-07	1.87804e-06
1300018P11Rik	-0.485331	1.99234e-07	1.88242e-06
Pip5k1c	0.555907	1.99836e-07	1.88619e-06
Scarb1	-0.635271	2.01307e-07	1.89815e-06
Galk1	0.536897	2.02124e-07	1.90393e-06
P2ry1	0.561873	2.04147e-07	1.92104e-06
Znrf1	0.619141	2.07541e-07	1.95101e-06
Chd7	0.72703	2.0909e-07	1.96359e-06
Sulf2	-0.601415	2.09464e-07	1.96512e-06
Nup205	0.504015	2.14004e-07	2.0057e-06
BC014685	0.668006	2.14677e-07	2.00998e-06
5430427O19Rik	-0.520726	2.16311e-07	2.02325e-06
Als2	0.464708	2.17387e-07	2.03127e-06
5830434P21Rik	0.536615	2.21255e-07	2.06534e-06
Zcwcc1	0.467429	2.26208e-07	2.10735e-06
Dip3b	0.529886	2.26031e-07	2.10735e-06
Cntf	0.54516	2.26558e-07	2.10851e-06
Pde3b	-0.666269	2.2756e-07	2.11571e-06
Semcap2	0.555824	2.3126e-07	2.14798e-06
Sqrdl	-0.630053	2.33281e-07	2.16243e-06
Psme1	-0.624697	2.33162e-07	2.16243e-06
Enc1	0.597906	2.3519e-07	2.17796e-06
Zfp297	0.4287	2.43085e-07	2.24884e-06
Vps16	0.586579	2.45905e-07	2.27267e-06
Hnrph1	0.540762	2.48249e-07	2.28979e-06
Dpp7	0.675921	2.48194e-07	2.28979e-06
2810442O16Rik	0.559254	2.50971e-07	2.31195e-06
Akap1	0.704587	2.51148e-07	2.31195e-06
Pcdha1	-0.546916	2.5422e-07	2.33792e-06
Snapc5	-0.616359	2.5579e-07	2.35004e-06
Kynu	-0.593517	2.57151e-07	2.36022e-06
AI662250	-0.506552	2.59531e-07	2.37972e-06
Mcm4	-0.491899	2.60656e-07	2.38768e-06
Dst	0.535176	2.65742e-07	2.43188e-06
Dhx30	0.424251	2.66023e-07	2.43206e-06
Llglh2	0.573072	2.74432e-07	2.50648e-06
A130052D22	0.723618	2.75332e-07	2.51224e-06
3110050K21Rik	0.709966	2.78739e-07	2.54083e-06
Tmpit	0.468097	2.8032e-07	2.55025e-06
Tbc1d1	0.48244	2.80109e-07	2.55025e-06
Ap1s2	-0.543848	2.88315e-07	2.62043e-06
BC057022	-0.451721	2.89272e-07	2.62657e-06
Nr5a1	-0.541155	2.92586e-07	2.65407e-06
Nical	0.579197	2.98716e-07	2.70704e-06
Pank4	0.499044	3.00298e-07	2.71874e-06
Slc7a7	-0.556024	3.02782e-07	2.73856e-06
Psmd2	0.469879	3.07273e-07	2.77648e-06
D230037D09Rik	0.657382	3.10888e-07	2.80643e-06
1700021C14Rik	-0.519403	3.12841e-07	2.82133e-06
Syk	0.637547	3.14411e-07	2.83274e-06
Ccl2	0.713942	3.16051e-07	2.84477e-06
Ap2a2	-0.564056	3.16991e-07	2.85047e-06
Blcap	0.53613	3.21742e-07	2.8904e-06
1110007F12Rik	0.624836	3.24087e-07	2.90866e-06
Tram1	-0.502336	3.24732e-07	2.91165e-06
Plaur	-0.587996	3.25056e-07	2.91175e-06
Paics	-0.499322	3.28552e-07	2.93742e-06
Rab24	0.527234	3.2853e-07	2.93742e-06
2510048K03Rik	-0.457406	3.36021e-07	3.00132e-06
1200011O22Rik	-0.496074	3.39811e-07	3.03226e-06
A430107D22Rik	0.502456	3.40393e-07	3.03454e-06
Edg2	-0.565567	3.41267e-07	3.03653e-06
Nap1l1	-0.465158	3.41025e-07	3.03653e-06
B830007D08Rik	0.573738	3.45894e-07	3.07476e-06
Esd	0.634318	3.46295e-07	3.07539e-06
Sypl	-0.496401	3.47485e-07	3.08302e-06
Tnip1	0.556576	3.49946e-07	3.1019e-06
C330006K01Rik	0.52274	3.55759e-07	3.15043e-06
Elmo1	0.589077	3.57146e-07	3.1597e-06
2610042O14Rik	-0.416119	3.57957e-07	3.16388e-06
6820449I09Rik	0.447071	3.6261e-07	3.20197e-06
Sumo2	-0.465099	3.6304e-07	3.20273e-06
Kcnj10	-0.558505	3.63696e-07	3.20548e-06
Mertk	0.551801	3.65356e-07	3.21707e-06
5033428A16Rik	-0.494574	3.68838e-07	3.24466e-06
2010319C14Rik	-0.514497	3.69346e-07	3.24606e-06
Elk3	-0.593476	3.70314e-07	3.25151e-06
F830208F22Rik	-0.437565	3.72267e-07	3.26558e-06
Pabpc4	0.48115	3.73327e-07	3.27179e-06
Slamf7	0.576573	3.75221e-07	3.2853e-06
Rutbc3	0.546016	3.84171e-07	3.36051e-06
Por	0.674916	3.88111e-07	3.39178e-06
AI595366	0.475862	3.89444e-07	3.40024e-06
Cd83	-0.630419	3.90021e-07	3.40209e-06
Cdkn1a	-0.498418	3.90536e-07	3.4034e-06
Cask	-0.614934	3.92063e-07	3.41352e-06
3300001P08Rik	0.680434	3.94029e-07	3.42742e-06
Pdcd4	-0.513142	3.96576e-07	3.44636e-06
Myo7a	0.542656	4.07002e-07	3.53367e-06
Cox6a2	0.569683	4.10445e-07	3.56025e-06
1110001J03Rik	-0.458575	4.13818e-07	3.58617e-06
2410118P20Rik	0.490565	4.20011e-07	3.63645e-06
Spnb2	0.518199	4.22564e-07	3.65516e-06
Hist1h4b	-0.569525	4.2404e-07	3.66452e-06
9930111J21Rik	-0.477008	4.25383e-07	3.67272e-06
2510002A14Rik	0.501679	4.2747e-07	3.68733e-06
Hs1bp1	0.596822	4.31545e-07	3.71903e-06
AU040950	-0.442154	4.32685e-07	3.72541e-06
2310009E04Rik	-0.537517	4.36952e-07	3.75868e-06
D030051N19Rik	0.486974	4.39832e-07	3.77996e-06
2310037I24Rik	-0.569168	4.40976e-07	3.78532e-06
Nfatc1	-0.416886	4.41269e-07	3.78532e-06
P4hb	0.480941	4.4313e-07	3.79779e-06
Ptprc	-0.694304	4.44491e-07	3.80595e-06
Nudt1	-0.553855	4.45949e-07	3.81459e-06
2700038I16Rik	0.515564	4.46318e-07	3.81459e-06
4933407N01Rik	-0.565762	4.4845e-07	3.82929e-06
Oplah	-0.593813	4.49881e-07	3.83221e-06
2210008I11Rik	0.535845	4.50167e-07	3.83221e-06
Matk	0.580302	4.49794e-07	3.83221e-06
Plec1	0.658953	4.50437e-07	3.83221e-06
Pwp2h	0.466691	4.51988e-07	3.8419e-06
Gdap10	0.795966	4.54142e-07	3.85669e-06
1110012E06Rik	0.437673	4.59719e-07	3.90049e-06
Asb8	-0.428427	4.61029e-07	3.90805e-06
Nfil3	-0.583894	4.64148e-07	3.93091e-06
Dph2l2	0.445421	4.69273e-07	3.9707e-06
C230090D14	-0.407546	4.73245e-07	4.00068e-06
6430527G18Rik	0.72153	4.74907e-07	4.01109e-06
9630054F20Rik	-0.543916	4.7658e-07	4.02158e-06
Man2c1	0.473005	4.874e-07	4.10916e-06
Ptgs1	-0.620626	4.88864e-07	4.11778e-06
Pdgfb	-0.496961	4.90184e-07	4.12516e-06
Nfix	-0.55037	4.9698e-07	4.17858e-06
Hspa9a	0.428027	4.99837e-07	4.19881e-06
1300001I01Rik	0.643257	5.00633e-07	4.20171e-06
Rab7	0.48725	5.09624e-07	4.27332e-06
Casp3	-0.560117	5.13262e-07	4.29995e-06
Cib2	-0.578209	5.19707e-07	4.35004e-06
Commd8	-0.506718	5.23489e-07	4.37776e-06
Srrm1	0.640641	5.24936e-07	4.38593e-06
Rpa2	-0.671487	5.31618e-07	4.43777e-06
Bscl2	-0.418063	5.33802e-07	4.45201e-06
Mtss1	0.467244	5.34507e-07	4.45391e-06
Zdhhc9	-0.519065	5.42783e-07	4.51882e-06
Tcp1	-0.437872	5.43761e-07	4.51889e-06
D130059P03Rik	0.650744	5.43438e-07	4.51889e-06
Arl6ip5	-0.599733	5.48634e-07	4.55532e-06
Psmb10	-0.578588	5.52337e-07	4.58199e-06
MGC18837	-0.468084	5.53832e-07	4.5903e-06
Lamp2	-0.499608	5.58684e-07	4.6264e-06
Scp2	-0.488316	5.59692e-07	4.62653e-06
Brd4	0.501631	5.59642e-07	4.62653e-06
Rbpsuh	0.607737	5.66541e-07	4.67898e-06
Hk3	0.637892	5.72894e-07	4.72727e-06
Ctps2	-0.55077	5.74627e-07	4.73737e-06
Clecsf12	-0.580643	5.85167e-07	4.82e-06
Atp1a1	0.403943	5.87795e-07	4.83737e-06
C86073	0.473649	5.91643e-07	4.86474e-06
BC010250	0.569055	5.93045e-07	4.87196e-06
Rapsn	-0.65686	5.9498e-07	4.88355e-06
Vps16	0.498316	5.97179e-07	4.89729e-06
H2-T23	-0.466694	5.97841e-07	4.89841e-06
Pdcd4	-0.523539	6.06454e-07	4.96025e-06
Sema6b	0.572803	6.05958e-07	4.96025e-06
2700087H15Rik	0.458352	6.09757e-07	4.98289e-06
Brpf1	0.478529	6.16031e-07	5.02975e-06
Arpp19	-0.456401	6.18484e-07	5.04536e-06
2410001H17Rik	-0.46398	6.21211e-07	5.05874e-06
Mint	0.613025	6.21077e-07	5.05874e-06
Lrrfip2	0.433714	6.25348e-07	5.08716e-06
Lamc1	0.537224	6.25793e-07	5.08716e-06
B130016L12Rik	0.442831	6.32328e-07	5.13581e-06
Eif4ebp3	0.505737	6.36063e-07	5.16164e-06
Ass1	-0.496364	6.37121e-07	5.16573e-06
6430402L03Rik	-0.473389	6.39748e-07	5.18252e-06
B230369L08Rik	0.474707	6.48503e-07	5.24887e-06
Itgam	-0.545334	6.59603e-07	5.33199e-06
Camk1d	-0.475463	6.59916e-07	5.33199e-06
Rfc4	-0.622033	6.61744e-07	5.33749e-06
Tens1	0.450557	6.61376e-07	5.33749e-06
Dvl1	0.428588	6.65049e-07	5.35951e-06
Eif3s6	-0.58472	6.65871e-07	5.3615e-06
Etv4	0.602706	6.67042e-07	5.36629e-06
Eif5	0.493306	6.67809e-07	5.36782e-06
Cri1	-0.616206	6.6928e-07	5.37038e-06
Mnab	0.578006	6.68872e-07	5.37038e-06
Irf1	-0.569372	6.80126e-07	5.45271e-06
Fads1	-0.386631	6.84413e-07	5.48237e-06
Zfp313	-0.626907	6.94312e-07	5.55689e-06
AI427138	0.48675	7.02589e-07	5.6183e-06
B430306N03Rik	0.543462	7.06378e-07	5.64375e-06
4930403O06Rik	-0.581965	7.10238e-07	5.66973e-06
Ard1	-0.523795	7.19412e-07	5.73805e-06
Pgcp	-0.544591	7.28743e-07	5.80751e-06
Taf12	-0.423566	7.30237e-07	5.81443e-06
Zmpste24	-0.434877	7.36157e-07	5.85656e-06
1110025F24Rik	-0.515325	7.36945e-07	5.85783e-06
D7Rp2e	-0.498735	7.44061e-07	5.90935e-06
Arl6ip5	-0.621085	7.51555e-07	5.95871e-06
Polrmt	0.453347	7.51332e-07	5.95871e-06
Psma1	-0.562788	7.54041e-07	5.97334e-06
4930519N13Rik	0.519615	7.5648e-07	5.98757e-06
Hspbap1	0.448384	7.57361e-07	5.98945e-06
Tceb1	-0.480431	7.61285e-07	6.01028e-06
Capg	0.450911	7.60709e-07	6.01028e-06
Phf11	-0.511718	7.64754e-07	6.03256e-06
Pygl	-0.428202	7.66883e-07	6.04423e-06
Cerkl	-0.514904	7.68926e-07	6.05521e-06
Irf1	-0.543994	7.72214e-07	6.07596e-06
Unc13b	0.489538	7.73529e-07	6.08118e-06
Polb	-0.516954	7.76892e-07	6.10247e-06
Vkorc1	-0.428493	7.82501e-07	6.13618e-06
Fmnl3	0.450843	7.82108e-07	6.13618e-06
Cpne2	0.42616	7.92417e-07	6.20871e-06
Cutl1	0.562936	7.94454e-07	6.21944e-06
Arhgdib	-0.718655	8.04511e-07	6.29288e-06
1190007F08Rik	-0.439416	8.09612e-07	6.32217e-06
4632419K20Rik	0.581354	8.09482e-07	6.32217e-06
Hes6	0.420606	8.1835e-07	6.38505e-06
1810059G22Rik	-0.434774	8.20569e-07	6.397e-06
Rai1	0.561203	8.36667e-07	6.51705e-06
Bloc1s1	-0.562877	8.41888e-07	6.55224e-06
6530401P13	0.611406	8.45812e-07	6.57729e-06
1810015M01Rik	-0.57684	8.48995e-07	6.59653e-06
Ccl8	-0.622899	8.51499e-07	6.6057e-06
BC018399	0.464686	8.51594e-07	6.6057e-06
Nsdhl	-0.494473	8.54707e-07	6.62433e-06
Ep400	0.620145	8.62798e-07	6.68148e-06
Ccng1	-0.631257	8.6737e-07	6.71131e-06
Serpinb6a	0.396937	8.81929e-07	6.8183e-06
Rpl7	-0.595666	9.03028e-07	6.97563e-06
Sumo1	-0.591262	9.14167e-07	7.05582e-06
Impdh1	0.44551	9.20851e-07	7.10153e-06
Pdlim2	-0.585262	9.29441e-07	7.16184e-06
Nfat5	0.466094	9.40339e-07	7.23983e-06
Hrmt1l1	0.409904	9.55486e-07	7.35038e-06
Vdp	0.419133	9.58496e-07	7.36745e-06
Siat7d	0.587711	9.59387e-07	7.36822e-06
Pctk1	0.56284	9.60221e-07	7.36855e-06
Elmo1	0.543835	9.64148e-07	7.39259e-06
Ntsr1	-0.448058	9.75783e-07	7.47565e-06
Hprt	-0.652146	9.93096e-07	7.59629e-06
Slc31a1	-0.434037	9.93975e-07	7.59629e-06
Mrps6	0.543696	9.9367e-07	7.59629e-06
Mrpl30	-0.425585	9.99066e-07	7.62894e-06
B230113M03Rik	0.437235	1.00108e-06	7.63178e-06
Prkwnk1	0.522742	1.00057e-06	7.63178e-06
Pml	-0.434184	1.00338e-06	7.63752e-06
Phgdh	0.536518	1.00347e-06	7.63752e-06
9130011J15Rik	-0.445369	1.00895e-06	7.66703e-06
Esam1	0.687231	1.00899e-06	7.66703e-06
Sepw1	0.518695	1.0214e-06	7.75495e-06
Dek	-0.489151	1.02451e-06	7.76592e-06
BC019206	0.532922	1.02372e-06	7.76592e-06
Syngr2	-0.420334	1.0272e-06	7.78e-06
Eif4g2	-0.51059	1.02872e-06	7.78521e-06
Gpr146	-0.460237	1.03283e-06	7.80995e-06
Tnfrsf14	-0.486155	1.03655e-06	7.82783e-06
Scand1	-0.478426	1.03688e-06	7.82783e-06
Fln29	-0.453454	1.0388e-06	7.83597e-06
AW146020	0.437842	1.05751e-06	7.97068e-06
5830484A20Rik	-0.529955	1.0623e-06	7.99638e-06
Itgb5	-0.46958	1.06326e-06	7.99638e-06
Brd2	0.554493	1.06349e-06	7.99638e-06
Pira5	-0.458685	1.08279e-06	8.13491e-06
BC021438	0.44891	1.08519e-06	8.14634e-06
Hcph	-0.454431	1.09335e-06	8.19553e-06
Slc4a2	0.419927	1.0935e-06	8.19553e-06
Pfn2	0.461085	1.09689e-06	8.21436e-06
Ccl9	-0.730604	1.1059e-06	8.27518e-06
2010002H18Rik	0.433664	1.10696e-06	8.27644e-06
Prdm2	0.538563	1.11211e-06	8.30829e-06
1810007M14Rik	0.423386	1.11599e-06	8.33058e-06
2310042M24Rik	-0.601229	1.11914e-06	8.34744e-06
Dnmt3l	0.47985	1.13319e-06	8.44541e-06
Itch	0.460496	1.13623e-06	8.46134e-06
Lgals9	-0.575711	1.13819e-06	8.46918e-06
Atp9b	0.378257	1.14811e-06	8.53617e-06
D630044F24Rik	0.622806	1.17016e-06	8.69313e-06
Zc3hdc7	0.524556	1.17455e-06	8.71879e-06
Ap3d1	0.451986	1.18056e-06	8.75645e-06
Ccnd1	-0.707869	1.19216e-06	8.8284e-06
E2f2	-0.442742	1.19188e-06	8.8284e-06
Mxd4	-0.555904	1.208e-06	8.9386e-06
Vrk3	0.463849	1.25882e-06	9.30726e-06
BC024537	0.823053	1.2601e-06	9.30934e-06
Paox	-0.458135	1.26929e-06	9.36984e-06
Atp6v1a1	0.641747	1.27243e-06	9.38554e-06
Ntn3	0.522666	1.27461e-06	9.39311e-06
1700088E04Rik	0.619126	1.27547e-06	9.39311e-06
LOC381621	0.4603	1.27776e-06	9.40252e-06
Fvt1	0.444812	1.29281e-06	9.50578e-06
Ccr5	-0.884251	1.29622e-06	9.52335e-06
Anp32a	-0.502519	1.30801e-06	9.60236e-06
4632411B12Rik	0.460338	1.32347e-06	9.70821e-06
0610025P10Rik	0.378918	1.32459e-06	9.70877e-06
Pbxip1	0.474328	1.32594e-06	9.71108e-06
1300007F04Rik	-0.459778	1.33558e-06	9.77394e-06
0610007H07Rik	-0.395027	1.34682e-06	9.84851e-06
Paip1	-0.427698	1.35139e-06	9.87415e-06
Gstm1	0.425992	1.36957e-06	9.99914e-06
Limd1	0.441623	1.37235e-06	1.00116e-05
Lpl	-0.532241	1.39952e-06	1.02018e-05
Rhog	-0.688816	1.40518e-06	1.0235e-05
Hnrpk	-0.560104	1.40745e-06	1.02436e-05
D15Ertd366e	-0.624416	1.41569e-06	1.02956e-05
BC021438	0.530496	1.44022e-06	1.04657e-05
Ap2a1	0.511549	1.46239e-06	1.06186e-05
2610024E20Rik	0.393963	1.46916e-06	1.06594e-05
Pdk1	0.482662	1.47438e-06	1.0689e-05
Eef1d	-0.430865	1.49847e-06	1.08552e-05
Gna13	0.442686	1.50125e-06	1.08669e-05
Pik3cg	-0.595994	1.54685e-06	1.11883e-05
Brd3	0.470231	1.56371e-06	1.13014e-05
B130016L12Rik	0.45855	1.5854e-06	1.14493e-05
Map3k7ip1	0.544151	1.58852e-06	1.1463e-05
Ptcd2	-0.419338	1.59241e-06	1.14821e-05
Ars2	0.404448	1.60666e-06	1.15759e-05
Plekhe1	0.402169	1.6082e-06	1.15781e-05
Sca2	0.462499	1.61797e-06	1.16394e-05
Siat7d	0.44605	1.63322e-06	1.17239e-05
Eif2c3	0.48706	1.63349e-06	1.17239e-05
Ccl7	0.587547	1.63321e-06	1.17239e-05
1500016L11Rik	-0.426507	1.63484e-06	1.17245e-05
Zfp28	0.42101	1.64172e-06	1.17648e-05
Dhrs8	-0.528259	1.65058e-06	1.18011e-05
Pfdn5	-0.513881	1.64863e-06	1.18011e-05
Stat4	-0.459929	1.64984e-06	1.18011e-05
2900073G15Rik	-0.434534	1.65365e-06	1.18098e-05
Cox5a	-0.408024	1.65433e-06	1.18098e-05
Ddx5	-0.545857	1.65982e-06	1.18399e-05
Rab7l1	-0.447946	1.66241e-06	1.18493e-05
Pfkp	0.451834	1.67248e-06	1.1912e-05
2610014H22Rik	0.502105	1.68745e-06	1.20094e-05
E130307M08Rik	0.433894	1.69947e-06	1.20857e-05
Camta2	0.453172	1.71911e-06	1.2216e-05
Pon3	-0.501449	1.73904e-06	1.23483e-05
Psmb9	-0.570336	1.74924e-06	1.24112e-05
Scyl1	0.423222	1.75602e-06	1.24433e-05
Eif2c3	0.615733	1.75643e-06	1.24433e-05
4922501C03Rik	0.495677	1.76336e-06	1.24829e-05
Mtmr3	0.446767	1.76854e-06	1.251e-05
Supt4h	-0.502011	1.80322e-06	1.27456e-05
Tnfaip8	-0.506105	1.81348e-06	1.28085e-05
Il2rg	-0.499367	1.84404e-06	1.30145e-05
Rpl13a	-0.40386	1.87156e-06	1.31986e-05
Luc7l	0.477131	1.87656e-06	1.32239e-05
Rnf19	0.421056	1.88573e-06	1.32685e-05
Laf4l	0.442921	1.88461e-06	1.32685e-05
2610204K14Rik	-0.469104	1.8891e-06	1.32822e-05
6720485C15Rik	-0.416014	1.92083e-06	1.34951e-05
9330186A19Rik	0.372769	1.96607e-06	1.38025e-05
2810052M02Rik	0.461227	1.97286e-06	1.38397e-05
Hbp1	0.367852	1.97464e-06	1.38418e-05
5730427M17Rik	0.558183	1.9807e-06	1.38739e-05
Spg21	0.389054	2.00988e-06	1.40676e-05
0610040B21Rik	-0.371902	2.03563e-06	1.42372e-05
Pi4k2b	0.431606	2.05543e-06	1.43649e-05
A830039B04Rik	0.492039	2.08364e-06	1.45511e-05
Dapp1	-0.450254	2.09513e-06	1.46204e-05
Ttc11	-0.566963	2.11913e-06	1.47768e-05
Ap4s1	-0.441369	2.12093e-06	1.47783e-05
A930025D01Rik	0.438914	2.12562e-06	1.47999e-05
Gsk3b	0.42515	2.15923e-06	1.50227e-05
Impact	0.51802	2.18986e-06	1.52244e-05
Map2k2	0.415734	2.19901e-06	1.52767e-05
MGC18837	-0.558332	2.20435e-06	1.5289e-05
Ube2d3	-0.471707	2.20571e-06	1.5289e-05
Igsf4a	0.500979	2.20379e-06	1.5289e-05
Pdlim4	-0.509156	2.21656e-06	1.53528e-05
4933437K13Rik	0.447626	2.24754e-06	1.55557e-05
Als2cr3	0.401219	2.25421e-06	1.55904e-05
Ywhaq	-0.484792	2.26519e-06	1.56431e-05
Sh3kbp1	-0.392513	2.26394e-06	1.56431e-05
Rin1	0.41018	2.26869e-06	1.56556e-05
Cstb	0.366863	2.28213e-06	1.57368e-05
Ifi30	-0.415893	2.30768e-06	1.59011e-05
Hcst	-0.495688	2.3117e-06	1.5907e-05
Ifitm1	-0.437952	2.31194e-06	1.5907e-05
Hist1h4h	-0.49263	2.3334e-06	1.60428e-05
Hist1h4i	-0.607047	2.35761e-06	1.61972e-05
3110050K21Rik	0.54029	2.36029e-06	1.62037e-05
Lyl1	-0.466742	2.36286e-06	1.62094e-05
AA960558	0.450939	2.3793e-06	1.62862e-05
Hspd1	0.452562	2.37788e-06	1.62862e-05
B130040O20Rik	0.659787	2.37921e-06	1.62862e-05
Kifc2	0.491913	2.38583e-06	1.63069e-05
Bcl2	0.525993	2.385e-06	1.63069e-05
Nt5c2	-0.597894	2.43993e-06	1.66645e-05
Za20d1	0.542585	2.45277e-06	1.67399e-05
4930429O20Rik	0.455772	2.47266e-06	1.68633e-05
B230342M21Rik	-0.418713	2.4758e-06	1.68724e-05
Fxyd2	-0.660016	2.49886e-06	1.70171e-05
2610041P08Rik	0.40087	2.55599e-06	1.73934e-05
Eif4a1	0.44614	2.57367e-06	1.7501e-05
Pdpk1	0.568587	2.57635e-06	1.75064e-05
Tyms	-0.540357	2.59316e-06	1.76078e-05
Als2	0.397931	2.60897e-06	1.77022e-05
Akap9	0.429792	2.63945e-06	1.7896e-05
Fxyd2	-0.481394	2.6585e-06	1.7999e-05
Cnnm2	-0.378477	2.65695e-06	1.7999e-05
Map3k5	-0.438119	2.67818e-06	1.81191e-05
AB124611	-0.434593	2.7171e-06	1.8369e-05
Parp8	-0.517024	2.7193e-06	1.83705e-05
C130067A03Rik	0.685704	2.7346e-06	1.84606e-05
Mtap4	0.511943	2.73942e-06	1.84797e-05
Lair1	-0.474223	2.75417e-06	1.85657e-05
AA408556	0.470601	2.78029e-06	1.87283e-05
Bcl2l1	0.686121	2.78298e-06	1.87328e-05
2610103J23Rik	0.388278	2.79846e-06	1.88234e-05
Arhgef6	-0.483394	2.80106e-06	1.88273e-05
Stx1a	0.489421	2.81447e-06	1.89038e-05
Sepn1	0.427638	2.81926e-06	1.89223e-05
Bst2	-0.49723	2.82497e-06	1.8947e-05
Brp16	0.444142	2.84096e-06	1.90405e-05
Nup210	0.492675	2.85447e-06	1.91173e-05
Bcl2	0.437581	2.85775e-06	1.91256e-05
Arpc5	-0.561937	2.90785e-06	1.94469e-05
5830427D03Rik	0.597515	2.91843e-06	1.95036e-05
Syngr1	0.548964	2.93311e-06	1.95877e-05
AW540478	0.452485	2.93925e-06	1.96146e-05
Napa	0.40663	2.98852e-06	1.99292e-05
Cdk2ap1	-0.389902	3.00186e-06	2.00038e-05
Mettl1	0.495141	3.03849e-06	2.02334e-05
9930027N05Rik	-0.544685	3.05958e-06	2.03593e-05
AI747699	-0.399136	3.06207e-06	2.03614e-05
scl0003251.1_21	0.52467	3.06605e-06	2.03732e-05
1810049H13Rik	-0.513722	3.07263e-06	2.04025e-05
Sn	-0.618842	3.08457e-06	2.04526e-05
4631423B10Rik	0.557494	3.08248e-06	2.04526e-05
Atp10d	-0.473162	3.10029e-06	2.05281e-05
LOC621954	-0.444453	3.10036e-06	2.05281e-05
Hbld2	-0.404768	3.11143e-06	2.05867e-05
Cd81	-0.404252	3.13922e-06	2.07528e-05
Tub	0.418963	3.14099e-06	2.07528e-05
Birc5	-0.666352	3.14348e-06	2.07545e-05
9430063L05Rik	0.510794	3.1526e-06	2.08e-05
Pnrc2	-0.374562	3.16293e-06	2.08534e-05
ORF18	-0.406647	3.19878e-06	2.10748e-05
Fhl3	-0.530015	3.20957e-06	2.1131e-05
Lamp2	-0.429051	3.22265e-06	2.12021e-05
Maged1	-0.426596	3.24496e-06	2.13338e-05
Eno1	0.623568	3.26683e-06	2.14625e-05
1110001A05Rik	-0.447226	3.28838e-06	2.15888e-05
AI840980	0.503867	3.29953e-06	2.16468e-05
Fdft1	0.793188	3.30634e-06	2.16762e-05
2510005D08Rik	-0.662217	3.34232e-06	2.18967e-05
Ctsh	-0.39752	3.37589e-06	2.21011e-05
Hhex	-0.399775	3.40323e-06	2.22644e-05
Casp8	-0.397056	3.42233e-06	2.23736e-05
Sat1	0.421241	3.44108e-06	2.24804e-05
Slc40a1	-0.495595	3.47069e-06	2.26426e-05
3632413B07Rik	0.524914	3.47076e-06	2.26426e-05
Slc39a7	0.549313	3.50243e-06	2.28332e-05
Clecsf12	-0.585254	3.52123e-06	2.29397e-05
Oas1g	-0.409631	3.5458e-06	2.30836e-05
Cic	0.445081	3.56684e-06	2.32044e-05
Ars2	0.366909	3.57864e-06	2.32649e-05
Socs6	0.44646	3.59157e-06	2.33327e-05
Aldoa	0.558709	3.61624e-06	2.34766e-05
Rxrb	0.453845	3.65267e-06	2.36966e-05
F930048N03Rik	-0.459311	3.67489e-06	2.38241e-05
Mcl1	0.526883	3.70231e-06	2.39852e-05
1500003O03Rik	-0.552888	3.71915e-06	2.40608e-05
Itm2b	-0.335434	3.71736e-06	2.40608e-05
E030006K04Rik	-0.390675	3.74279e-06	2.41969e-05
Rapgef1	0.51751	3.75994e-06	2.4291e-05
Rgs14	-0.445878	3.77148e-06	2.43487e-05
Slc35b1	-0.572595	3.79015e-06	2.44522e-05
D11Ertd497e	0.450116	3.8373e-06	2.47393e-05
2210404O07Rik	-0.532229	3.84063e-06	2.47436e-05
Usp36	0.506614	3.84842e-06	2.47767e-05
4632409L19Rik	0.487409	3.89153e-06	2.50369e-05
Ppfia1	0.503909	3.89832e-06	2.50633e-05
Mag	-0.397726	3.92027e-06	2.51871e-05
Mmp12	0.786835	3.92674e-06	2.52113e-05
Cyp27a1	-0.891534	3.94972e-06	2.53413e-05
LOC209387	-0.535726	3.95949e-06	2.53865e-05
Arhgap17	0.391746	3.9659e-06	2.54101e-05
4632417K02	-0.574388	3.98309e-06	2.55027e-05
Gapd	0.486916	3.99633e-06	2.55699e-05
Rab13	-0.398644	4.0055e-06	2.5611e-05
A630042L21Rik	0.539437	4.01107e-06	2.56291e-05
Rbbp7	-0.60098	4.02375e-06	2.56924e-05
Rab3il1	-0.490596	4.03227e-06	2.57292e-05
Rpl31	-0.371604	4.07877e-06	2.59903e-05
Gga2	0.471648	4.07867e-06	2.59903e-05
Ttc3	0.416265	4.11049e-06	2.61745e-05
3830406C13Rik	-0.399267	4.14562e-06	2.63802e-05
Cxcr3	-0.578679	4.16099e-06	2.64419e-05
Bcl2l11	-0.431074	4.15856e-06	2.64419e-05
Cdc6	-0.484155	4.17948e-06	2.65413e-05
2700084L06Rik	-0.439277	4.23016e-06	2.68265e-05
scl0002306.1_28	0.708883	4.23e-06	2.68265e-05
AI851464	0.46158	4.25613e-06	2.69729e-05
Cd44	0.60264	4.2693e-06	2.70379e-05
Syngr2	-0.590613	4.27817e-06	2.70757e-05
C130050O18Rik	-0.5934	4.28439e-06	2.70966e-05
AI450540	0.358617	4.31633e-06	2.72432e-05
Csnk1g2	0.393784	4.31404e-06	2.72432e-05
Got1	0.491566	4.31418e-06	2.72432e-05
Gapd	0.376472	4.32013e-06	2.72487e-05
Bloc1s1	-0.57712	4.33217e-06	2.73062e-05
Sumo1	-0.534052	4.38619e-06	2.76279e-05
Stx4a	0.394564	4.40303e-06	2.77153e-05
2310037I24Rik	-0.417394	4.45425e-06	2.80188e-05
Ptpn8	-0.47848	4.46849e-06	2.80894e-05
Atp6v1e1	0.372113	4.48071e-06	2.81404e-05
Baz2a	0.443707	4.48567e-06	2.81404e-05
Ccl4	0.611038	4.48378e-06	2.81404e-05
Eif4g3	0.390881	4.49275e-06	2.81659e-05
Sfmbt1	0.499542	4.53282e-06	2.83979e-05
Ncor1	0.476151	4.54433e-06	2.84318e-05
Vps39	0.575095	4.54419e-06	2.84318e-05
Cklfsf7	-0.503842	4.58408e-06	2.86613e-05
Pim3	-0.380879	4.61741e-06	2.88503e-05
BC031353	0.392137	4.62292e-06	2.88653e-05
Ptk9	-0.46175	4.63503e-06	2.89216e-05
Nme4	-0.55655	4.64392e-06	2.89576e-05
Tnrc6	0.601316	4.66182e-06	2.90498e-05
Rhobtb1	-0.551596	4.68329e-06	2.91641e-05
Ets2	-0.417621	4.69368e-06	2.92093e-05
Brrn1	-0.493979	4.70702e-06	2.92728e-05
Ltbp3	0.367723	4.72553e-06	2.93683e-05
Fosl2	-0.421332	4.73831e-06	2.94281e-05
Ppp1r9a	-0.474909	4.75538e-06	2.95144e-05
Dhrs7	-0.536981	4.77469e-06	2.95948e-05
Crsp9	-0.373289	4.77461e-06	2.95948e-05
Grpel2	0.510343	4.81429e-06	2.98204e-05
D7Ertd156e	0.471301	4.82146e-06	2.9845e-05
Hist2h4	-0.497419	4.92255e-06	3.04505e-05
Selpl	-0.40879	4.92877e-06	3.04688e-05
Frag1	-0.442181	4.99548e-06	3.08607e-05
Scp2	-0.45062	5.00086e-06	3.08734e-05
Ehmt1	0.489712	5.07106e-06	3.12861e-05
Tmod3	-0.449189	5.19551e-06	3.20327e-05
Ampd2	0.546148	5.21677e-06	3.21425e-05
Klf4	-0.452935	5.34633e-06	3.2919e-05
0610041G09Rik	-0.469463	5.36012e-06	3.29603e-05
Litaf	0.365532	5.35825e-06	3.29603e-05
Gypc	-0.411088	5.3883e-06	3.31118e-05
Dexi	-0.452314	5.44464e-06	3.34359e-05
Tubb5	-0.613846	5.46944e-06	3.35661e-05
Extl3	0.367303	5.48279e-06	3.36259e-05
Ostm1	0.330785	5.49273e-06	3.36425e-05
Rnf6	0.46606	5.4922e-06	3.36425e-05
Sfrs16	0.504232	5.53383e-06	3.3872e-05
Pex11a	0.406091	5.53755e-06	3.38725e-05
Ugt1a13	-0.664444	5.54833e-06	3.39162e-05
F730108M23Rik	0.411651	5.57165e-06	3.40364e-05
BC037393	0.624379	5.60132e-06	3.41952e-05
Ifi30	-0.523023	5.60698e-06	3.42074e-05
Fgd4	-0.338258	5.63172e-06	3.43358e-05
1300010M03Rik	-0.460283	5.64231e-06	3.43779e-05
Il11ra2	0.388309	5.66397e-06	3.44873e-05
2310016M24Rik	-0.443192	5.67348e-06	3.45226e-05
Stat1	-0.555017	5.73934e-06	3.48324e-05
Rps6ka5	-0.45945	5.73855e-06	3.48324e-05
Rps15	-0.423365	5.73404e-06	3.48324e-05
2010106G01Rik	-0.398735	5.73794e-06	3.48324e-05
Csrp2bp	0.356426	5.75087e-06	3.48796e-05
Rpo1-3	-0.39361	5.77804e-06	3.50216e-05
1810035L17Rik	-0.432058	5.79343e-06	3.50921e-05
Bcl2l1	0.592931	5.80553e-06	3.51425e-05
1810035L17Rik	-0.551327	5.8401e-06	3.53059e-05
Pold4	-0.385843	5.83916e-06	3.53059e-05
Psme1	-0.439345	5.85942e-06	3.53949e-05
Akap9	0.494856	5.86242e-06	3.53949e-05
Olfr1425	-0.465382	5.8667e-06	3.53978e-05
Kcnab2	0.410695	5.89391e-06	3.55389e-05
Ppargc1b	0.42436	5.93801e-06	3.57817e-05
Rnf141	-0.488543	5.96626e-06	3.59287e-05
Mid1ip1	0.470791	6.03148e-06	3.6283e-05
Pld3	0.538116	6.03289e-06	3.6283e-05
1810033B17Rik	-0.469523	6.05107e-06	3.63689e-05
BC061928	0.381688	6.11451e-06	3.67265e-05
Secisbp2	0.42117	6.16434e-06	3.70019e-05
Cyp4f16	-0.372416	6.18128e-06	3.70797e-05
Arrdc3	-0.485646	6.21533e-06	3.7236e-05
BC004012	-0.395689	6.21352e-06	3.7236e-05
scl0003651.1_17	0.540319	6.22039e-06	3.72424e-05
Cbx3	-0.443028	6.2344e-06	3.73023e-05
Syngr2	-0.408182	6.24822e-06	3.7361e-05
Usp4	0.460965	6.29761e-06	3.76322e-05
Rpl13a	-0.388842	6.33012e-06	3.7778e-05
gi_6679936_ref_NM_008084.1__328	0.399439	6.32634e-06	3.7778e-05
Irf2bp1	0.335788	6.33742e-06	3.77973e-05
Comt	-0.420013	6.37574e-06	3.80015e-05
Prg	-0.455331	6.3858e-06	3.80372e-05
3632413B07Rik	0.493998	6.42432e-06	3.82421e-05
Samhd1	-0.420658	6.48792e-06	3.85961e-05
2210011C24Rik	0.495093	6.51114e-06	3.87095e-05
Acas2l	-0.426807	6.57067e-06	3.90385e-05
3110031B13Rik	-0.417014	6.58346e-06	3.90815e-05
Srebp2	0.475965	6.58629e-06	3.90815e-05
Ak3l	-0.37471	6.59124e-06	3.90859e-05
Sumo3	-0.412714	6.6135e-06	3.9193e-05
Nat6	0.524106	6.64292e-06	3.93423e-05
Taf11	-0.386608	6.68377e-06	3.95374e-05
Abcf1	0.367802	6.68434e-06	3.95374e-05
Arrb2	-0.383141	6.7194e-06	3.97195e-05
D5Bwg0860e	0.650558	6.81788e-06	4.02761e-05
Notch1	-0.397877	6.83569e-06	4.03557e-05
Calm2	-0.811706	6.90369e-06	4.07179e-05
Col23a1	0.585489	6.90578e-06	4.07179e-05
Calm5	-0.489953	6.91401e-06	4.07406e-05
Angptl2	0.522859	6.98328e-06	4.11228e-05
Elmo1	0.422837	6.98786e-06	4.11238e-05
Tpm3	-0.366158	7.02361e-06	4.13081e-05
Ddah2	0.589321	7.07041e-06	4.1557e-05
Rasa2	0.337021	7.15616e-06	4.2008e-05
Slamf8	0.688977	7.15313e-06	4.2008e-05
Cpd	0.660988	7.16224e-06	4.20173e-05
Ifngr1	-0.475019	7.17788e-06	4.20825e-05
Map17	0.451634	7.233e-06	4.2379e-05
Basp1	0.483481	7.39499e-06	4.33009e-05
Npn3	0.493801	7.4149e-06	4.33902e-05
Rexo1	0.448948	7.4233e-06	4.34121e-05
Dicer1	0.421642	7.43165e-06	4.34337e-05
Myh9	0.494186	7.47059e-06	4.36339e-05
scl0001345.1_85	-0.538199	7.50823e-06	4.38262e-05
Tyrobp	-0.369295	7.53759e-06	4.39701e-05
1110058L19Rik	-0.437855	7.63296e-06	4.44985e-05
Tacc2	0.496614	7.74714e-06	4.51359e-05
Ranbp9	-0.484484	7.7835e-06	4.53194e-05
Cog6	0.362045	7.83064e-06	4.55654e-05
Rab15	0.499937	7.85763e-06	4.5694e-05
Rras	-0.348615	7.8643e-06	4.57042e-05
5832424M12	-0.413792	7.87264e-06	4.57241e-05
Mylc2b	-0.484605	7.9232e-06	4.59605e-05
Cnot4	0.44814	7.91862e-06	4.59605e-05
Mgat4b	0.421519	7.96595e-06	4.61797e-05
Ubap2	0.388749	7.97455e-06	4.62008e-05
Pkd2	0.447325	7.98751e-06	4.62471e-05
Zfp277	-0.406502	8.05001e-06	4.65801e-05
Pou2f1	0.498484	8.06313e-06	4.6627e-05
2610318C08Rik	-0.517773	8.14111e-06	4.70198e-05
Ly6c	-0.488117	8.14115e-06	4.70198e-05
2010311D03Rik	-0.381773	8.15771e-06	4.70863e-05
Ptgir	-0.484388	8.17043e-06	4.71305e-05
Mfng	-0.527623	8.17846e-06	4.71476e-05
A2bp1	-0.542661	8.31169e-06	4.78388e-05
Gm628	-0.380748	8.31768e-06	4.78388e-05
D730019B10Rik	0.446839	8.3189e-06	4.78388e-05
Fem1c	0.553244	8.31753e-06	4.78388e-05
BC003940	-0.442115	8.41685e-06	4.83722e-05
Ppm2c	0.368868	8.45623e-06	4.85686e-05
Rev3l	0.466963	8.5037e-06	4.88111e-05
Arfgap3	0.436068	8.51156e-06	4.88262e-05
BC031853	0.427715	8.5186e-06	4.88365e-05
2210412D01Rik	0.399303	8.52787e-06	4.88595e-05
Ly9	0.429911	8.54113e-06	4.89055e-05
Tle1	-0.43105	8.57654e-06	4.9078e-05
Slc15a4	-0.401776	8.69822e-06	4.97133e-05
Pla2g12a	0.422105	8.69396e-06	4.97133e-05
BC052066	0.439752	8.74106e-06	4.99275e-05
Rtn4	-0.465225	8.75597e-06	4.9982e-05
Tfip11	0.522072	8.77301e-06	5.00486e-05
BC005682	-0.531123	8.82073e-06	5.029e-05
Slc25a17	-0.461076	8.87872e-06	5.05109e-05
Sec5l1	0.3264	8.87308e-06	5.05109e-05
Elmo1	0.422827	8.87773e-06	5.05109e-05
Bin3	0.470672	8.88115e-06	5.05109e-05
Zbtb17	0.342245	8.9314e-06	5.07656e-05
Csf2ra	0.368164	8.96416e-06	5.09208e-05
Zc3hdc1	-0.409074	9.08086e-06	5.15523e-05
Ezh2	-0.374984	9.10411e-06	5.16528e-05
Dner	-0.451968	9.1755e-06	5.20261e-05
Cyp4f16	-0.572079	9.19697e-06	5.20845e-05
Mscp	0.387361	9.19226e-06	5.20845e-05
Ethe1	-0.358812	9.3283e-06	5.27961e-05
Fli1	-0.371774	9.38023e-06	5.30578e-05
Senp3	0.33504	9.62496e-06	5.4409e-05
Bmf	-0.537758	9.65062e-06	5.4426e-05
G430095P16Rik	-0.41099	9.65133e-06	5.4426e-05
Nsdhl	-0.356371	9.65051e-06	5.4426e-05
Zfp275	0.442102	9.65034e-06	5.4426e-05
DXImx40e	0.369547	9.68779e-06	5.45955e-05
Nln	0.42349	9.6931e-06	5.45955e-05
Csf2rb1	0.456238	9.79356e-06	5.5128e-05
Pcdha11	-0.435002	9.80954e-06	5.51846e-05
Cdc42ep3	-0.522863	9.86466e-06	5.54612e-05
9230112O05Rik	0.391438	9.87664e-06	5.5495e-05
1110013G13Rik	-0.445796	9.91249e-06	5.56629e-05
Pcqap	0.412482	9.92661e-06	5.57086e-05
5730457F11Rik	0.41299	1.00684e-05	5.64703e-05
Gdi3	-0.37184	1.00887e-05	5.655e-05
Lmna	0.359375	1.01104e-05	5.66374e-05
2310037P21Rik	0.361598	1.02246e-05	5.72429e-05
D6Ertd365e	-0.455696	1.02778e-05	5.74907e-05
2610103J23Rik	0.371845	1.02812e-05	5.74907e-05
Mapk3	-0.474296	1.03222e-05	5.76506e-05
1810055E12Rik	-0.358868	1.03212e-05	5.76506e-05
2610318N02Rik	0.491612	1.0368e-05	5.78717e-05
C1r	-0.415349	1.04119e-05	5.80822e-05
Cfl2	0.494996	1.04316e-05	5.81575e-05
Nsbp1	-0.474469	1.04626e-05	5.82666e-05
Ndufs2	-0.360428	1.04637e-05	5.82666e-05
4833441J24Rik	0.549759	1.04935e-05	5.83976e-05
Ptgs1	-0.411619	1.05122e-05	5.84665e-05
Vmd2	0.49697	1.0532e-05	5.85419e-05
Kif1b	0.373106	1.05968e-05	5.8867e-05
Txnrd2	-0.324672	1.06205e-05	5.89633e-05
Epn2	0.411999	1.06402e-05	5.90376e-05
Oatl1	0.395642	1.06947e-05	5.93047e-05
Ebpl	-0.429991	1.07036e-05	5.93187e-05
Scamp2	-0.438935	1.07537e-05	5.95608e-05
Apoc4	-0.407461	1.08102e-05	5.98382e-05
Rab20	0.436288	1.08604e-05	6.00803e-05
4933427D14Rik	0.389879	1.09087e-05	6.0312e-05
Smox	-0.507567	1.09211e-05	6.03446e-05
Klf7	0.431588	1.09345e-05	6.0383e-05
Sh3bp2	0.370157	1.10102e-05	6.0765e-05
5830484A20Rik	-0.492754	1.1069e-05	6.10531e-05
Peli2	-0.680176	1.11147e-05	6.1269e-05
Prps2	-0.447648	1.11311e-05	6.13232e-05
2600005C20Rik	0.412911	1.11981e-05	6.16556e-05
Pts	-0.38348	1.12523e-05	6.18887e-05
Agpat2	-0.346178	1.12537e-05	6.18887e-05
Bag4	-0.377747	1.12777e-05	6.19475e-05
Cdadc1	0.444264	1.12745e-05	6.19475e-05
Ogdh	0.480421	1.13202e-05	6.21446e-05
Wars2	0.502094	1.14451e-05	6.27932e-05
Fbxo34	0.451537	1.14771e-05	6.29314e-05
Fln29	-0.379434	1.15721e-05	6.34149e-05
Atp2a2	0.355418	1.15933e-05	6.34938e-05
Ndor1	0.457642	1.16161e-05	6.35814e-05
Fxr2h	0.474217	1.17673e-05	6.43713e-05
Prdx4	-0.371466	1.18002e-05	6.45132e-05
Ptp4a2	-0.472133	1.1959e-05	6.53431e-05
Mecp2	0.370795	1.19713e-05	6.53718e-05
Lcp1	-0.462056	1.20684e-05	6.58635e-05
Psd4	0.524544	1.20868e-05	6.59255e-05
Ndufs2	-0.395804	1.21114e-05	6.60209e-05
Mylc2b	-0.340748	1.21563e-05	6.6227e-05
Tnfrsf1b	-0.433635	1.21751e-05	6.62907e-05
2310047I15Rik	0.466218	1.21915e-05	6.63411e-05
Tarbp2	0.415357	1.22158e-05	6.64348e-05
Gmeb2	0.400574	1.22917e-05	6.68082e-05
Gnas	-0.527796	1.2536e-05	6.80962e-05
4933407N01Rik	-0.539443	1.25545e-05	6.81573e-05
2310020H20Rik	-0.368177	1.27316e-05	6.90784e-05
Ctns	0.459245	1.27521e-05	6.91494e-05
Olfr1222	-0.434233	1.29353e-05	7.01017e-05
Arid2	0.388042	1.29564e-05	7.01588e-05
Gab2	0.480855	1.29609e-05	7.01588e-05
Rufy2	0.367003	1.29698e-05	7.01664e-05
Depdc6	-0.352688	1.30406e-05	7.05085e-05
Casp7	-0.428615	1.30585e-05	7.05642e-05
Gpnmb	0.453263	1.30721e-05	7.05967e-05
Jarid1b	0.459433	1.32015e-05	7.12546e-05
Eef1b2	-0.409892	1.32099e-05	7.12585e-05
Pgrmc1	-0.543282	1.32737e-05	7.15613e-05
1200009K13Rik	-0.384119	1.32965e-05	7.16425e-05
E130307M08Rik	0.386388	1.3323e-05	7.17437e-05
Rttn	-0.460852	1.33877e-05	7.2051e-05
P2rx4	-0.48839	1.34288e-05	7.22302e-05
Pfdn5	-0.370055	1.34857e-05	7.24946e-05
A830093M07	0.619636	1.34959e-05	7.25073e-05
2010315L10Rik	-0.402341	1.35246e-05	7.26197e-05
1110060F11Rik	-0.353631	1.36842e-05	7.34344e-05
Lmna	0.40066	1.37322e-05	7.36495e-05
Muc2	0.435145	1.3801e-05	7.3976e-05
Man2a2	0.440901	1.38325e-05	7.41024e-05
Setdb1	0.396131	1.38836e-05	7.4333e-05
Sf3b2	0.351325	1.40258e-05	7.50512e-05
Rabl2a	0.370973	1.40774e-05	7.5284e-05
Tcf19	-0.492555	1.42195e-05	7.59308e-05
Atf3	0.453896	1.42228e-05	7.59308e-05
Rad51l3	0.543359	1.42088e-05	7.59308e-05
Egln1	0.402534	1.42319e-05	7.59361e-05
Arfl4	-0.404811	1.44665e-05	7.71438e-05
Lrrfip2	0.515783	1.44907e-05	7.72285e-05
BC009118	-0.42026	1.46243e-05	7.78957e-05
C80638	0.454583	1.46337e-05	7.79012e-05
Ncdn	0.371196	1.46659e-05	7.80285e-05
Plk3	0.406784	1.46907e-05	7.81157e-05
Prkx	0.337053	1.47117e-05	7.81826e-05
2210012G02Rik	-0.403826	1.47434e-05	7.83062e-05
Sec15l1	-0.533898	1.49426e-05	7.9295e-05
1200003E16Rik	0.501116	1.49465e-05	7.9295e-05
Rnpep	-0.403223	1.49836e-05	7.94462e-05
1300018P11Rik	-0.410536	1.50063e-05	7.95216e-05
Mcm6	-0.486026	1.50452e-05	7.96824e-05
Vps16	0.409398	1.50586e-05	7.9708e-05
F7	0.484363	1.50852e-05	7.98034e-05
2010008E23Rik	-0.403474	1.51265e-05	7.99767e-05
Copeb	0.373862	1.52062e-05	8.03068e-05
Ube3c	0.381936	1.52062e-05	8.03068e-05
Smarca4	0.465666	1.52383e-05	8.04305e-05
2700029M09Rik	-0.402603	1.54255e-05	8.13728e-05
Trip12	0.445803	1.54513e-05	8.14628e-05
Abhd5	0.338355	1.54877e-05	8.16083e-05
Gadd45b	0.652699	1.55154e-05	8.17081e-05
Coro1c	0.430708	1.5541e-05	8.17964e-05
4632419I22Rik	-0.395294	1.55777e-05	8.19436e-05
D330001F17Rik	0.540555	1.56663e-05	8.23628e-05
Arid1a	0.368609	1.56806e-05	8.23918e-05
Cdkl2	0.395928	1.57509e-05	8.27143e-05
Ptdsr	0.379953	1.58955e-05	8.34268e-05
2010005J08Rik	0.365416	1.59261e-05	8.35403e-05
Snx2	-0.570082	1.60964e-05	8.42911e-05
Tsrc1	-0.37374	1.60887e-05	8.42911e-05
Phr1	0.336164	1.60883e-05	8.42911e-05
Elmo1	0.408976	1.63658e-05	8.56539e-05
MGC107702	-0.368837	1.64402e-05	8.59948e-05
Zfp524	-0.424263	1.64678e-05	8.60912e-05
3632431M01Rik	-0.383261	1.65036e-05	8.62295e-05
Cd68	0.590728	1.6556e-05	8.64552e-05
Itm2a	-0.406952	1.67228e-05	8.72297e-05
Psip1	-0.368944	1.67231e-05	8.72297e-05
1700001E16Rik	-0.47594	1.67566e-05	8.73332e-05
1200003C05Rik	-0.404357	1.67617e-05	8.73332e-05
Gpc1	0.396812	1.68498e-05	8.77434e-05
Snrpd3	-0.369509	1.69178e-05	8.80481e-05
Adam23	-0.725123	1.69497e-05	8.81157e-05
P2rx7	-0.359507	1.69476e-05	8.81157e-05
2310005E10Rik	-0.346346	1.70106e-05	8.8383e-05
BC013481	0.33345	1.70643e-05	8.86126e-05
1700051I12Rik	0.456735	1.71666e-05	8.90943e-05
1190002N15Rik	-0.356347	1.71843e-05	8.91365e-05
Fzd2	-0.44411	1.72645e-05	8.95026e-05
Tle4	-0.412085	1.75796e-05	9.10855e-05
6430548M08Rik	0.359767	1.76325e-05	9.13085e-05
Stau1	-0.323607	1.76429e-05	9.1312e-05
Pitpnm1	0.377223	1.77059e-05	9.1587e-05
BC003277	-0.404778	1.77243e-05	9.16315e-05
E330036I19Rik	-0.4323	1.78644e-05	9.23044e-05
Apba3	0.351828	1.79302e-05	9.25932e-05
Defb27	-0.354417	1.79648e-05	9.26688e-05
D10Wsu93e	0.423091	1.79613e-05	9.26688e-05
A930031F18Rik	0.448684	1.79902e-05	9.27487e-05
Hpcal1	-0.489917	1.80921e-05	9.32226e-05
Hira	-0.376528	1.83323e-05	9.43868e-05
0610039A15Rik	-0.362203	1.83384e-05	9.43868e-05
Eef1b2	-0.529892	1.85213e-05	9.52758e-05
Sfmbt2	0.625471	1.85592e-05	9.5418e-05
Pten	-0.423577	1.87076e-05	9.6128e-05
Akr1c12	-0.453894	1.87339e-05	9.62101e-05
Rpl7a	-0.4433	1.8758e-05	9.62808e-05
Lrp4	0.334631	1.88189e-05	9.63807e-05
Iqwd1	0.336459	1.88098e-05	9.63807e-05
Myo1b	0.381932	1.88029e-05	9.63807e-05
Map4k4	0.563363	1.87989e-05	9.63807e-05
Arhgap10	0.456826	1.8906e-05	9.67739e-05
D9Ertd392e	-0.446796	1.90522e-05	9.74411e-05
Rapgef5	0.377187	1.90588e-05	9.74411e-05
1190005I06Rik	0.436236	1.90678e-05	9.74411e-05
Hist2h2bb	0.435578	1.90825e-05	9.74628e-05
4930527B16Rik	0.423595	1.92837e-05	9.84366e-05
Fxc1	-0.460114	1.93074e-05	9.85035e-05
Ifi75	-0.523211	1.93851e-05	9.88461e-05
Itga5	0.49681	1.9437e-05	9.90566e-05
Cdc42ep2	-0.439338	1.95842e-05	9.97522e-05
Acvr1b	-0.506976	1.96695e-05	0.000100132
Mrvi1	-0.436415	1.96858e-05	0.00010016
Pde4a	-0.493528	1.98122e-05	0.000100748
Tbl3	0.391072	1.99475e-05	0.000101381
0610007P14Rik	-0.351091	2.00188e-05	0.000101687
Mrpl48	-0.368462	2.01738e-05	0.000102419
BC019206	0.741442	2.02128e-05	0.000102561
Cova1	-0.374124	2.02748e-05	0.00010282
Lmna	0.395603	2.04139e-05	0.000103469
Ppt2	-0.323897	2.05398e-05	0.000104051
Gpsm1	0.374784	2.056e-05	0.000104096
Mnt	0.580405	2.06332e-05	0.00010441
Trim8	0.366788	2.06805e-05	0.000104593
Nck2	0.506057	2.09507e-05	0.000105902
Stk6	-0.499278	2.12895e-05	0.000107556
Dclre1c	-0.486512	2.13863e-05	0.000107986
Clcn3	0.43235	2.14131e-05	0.000108063
AI115600	0.378823	2.15065e-05	0.000108476
Sec22l2	-0.319335	2.15903e-05	0.000108839
D15Ertd366e	-0.477251	2.19266e-05	0.000110475
Kcnj2	0.34559	2.20148e-05	0.000110859
Cpsf5	-0.377482	2.20564e-05	0.000110949
0910001A06Rik	-0.317171	2.20449e-05	0.000110949
Zc3hdc8	0.388559	2.22275e-05	0.000111749
Bcap29	-0.432272	2.23225e-05	0.000112106
Rrbp1	0.405132	2.23144e-05	0.000112106
Lig1	-0.344357	2.24206e-05	0.000112538
Rcl1	0.309708	2.24961e-05	0.000112795
Ris2	0.359889	2.24907e-05	0.000112795
4833439L19Rik	-0.39348	2.25152e-05	0.00011283
Clspn	-0.464449	2.26088e-05	0.000113239
Taf5l	0.376586	2.26614e-05	0.000113342
Bat1a	0.42367	2.26659e-05	0.000113342
Jak3	0.495588	2.26587e-05	0.000113342
Stmn1	-0.485495	2.28315e-05	0.000114109
4921505C17Rik	0.398564	2.30502e-05	0.00011514
Asns	0.342487	2.31025e-05	0.000115339
Cops5	-0.352805	2.3154e-05	0.000115534
2300004C15Rik	-0.366005	2.33655e-05	0.000116527
Padi2	0.369849	2.34796e-05	0.000117034
4930504E06Rik	0.456559	2.36333e-05	0.000117737
Gpr180	-0.339408	2.36675e-05	0.000117844
LOC211660	0.481865	2.38396e-05	0.000118638
Rap1b	-0.338474	2.39281e-05	0.000118951
Mesdc1	0.331974	2.39204e-05	0.000118951
Frk	0.348555	2.40172e-05	0.00011933
Idh2	-0.383801	2.40527e-05	0.000119443
Rab11a	-0.373713	2.40747e-05	0.000119489
D1Ertd161e	0.302415	2.42343e-05	0.000120216
Mat2a	-0.44454	2.43711e-05	0.000120772
D3Jfr1	-0.349618	2.43981e-05	0.000120772
Mgrn1	0.331934	2.43948e-05	0.000120772
Pacrg	0.431749	2.43728e-05	0.000120772
Pkm2	0.355116	2.44924e-05	0.000121175
6030413G23Rik	0.411914	2.45845e-05	0.000121566
Nola3	-0.463716	2.46925e-05	0.000122034
Amd2	-0.400406	2.47174e-05	0.000122093
C330008K14Rik	0.396798	2.50293e-05	0.000123568
C230096C10Rik	0.348231	2.51501e-05	0.000124098
Atp6v1f	0.293825	2.52403e-05	0.000124478
Elys	0.399828	2.5263e-05	0.000124524
Apg7l	0.369179	2.53424e-05	0.000124849
Snx2	-0.41186	2.54096e-05	0.000125114
Pqbp1	-0.427317	2.54863e-05	0.000125425
Ard1	-0.346926	2.55938e-05	0.000125888
Srp9	-0.376495	2.56224e-05	0.000125962
Ndufb3	-0.405992	2.56602e-05	0.000126081
Ctsz	0.421279	2.58311e-05	0.000126854
D10Jhu81e	-0.367466	2.59869e-05	0.000127552
Gdi1	0.449636	2.60077e-05	0.000127587
Zfp318	0.380154	2.60602e-05	0.000127777
Clic4	0.325957	2.63759e-05	0.000129257
Gcn1l1	0.555736	2.63938e-05	0.000129277
Phf12	0.512086	2.66213e-05	0.000130323
4933426M11Rik	-0.35784	2.66649e-05	0.000130467
E030034P13Rik	0.412412	2.67349e-05	0.000130741
Hist4h4	-0.402271	2.67814e-05	0.000130832
Deb1	0.324659	2.67815e-05	0.000130832
Antxr1	-0.464807	2.70063e-05	0.000131861
Fthfsdc1	0.462933	2.70262e-05	0.000131889
Map2k3	0.374572	2.70561e-05	0.000131966
Rrm1	-0.399827	2.70927e-05	0.000132006
Lrrn6a	-0.359604	2.70921e-05	0.000132006
Sh2d3c	0.411957	2.72194e-05	0.000132554
Keap1	0.37559	2.75427e-05	0.000134058
Zfp277	-0.381713	2.78165e-05	0.000135274
Casp1	-0.332193	2.78215e-05	0.000135274
Prdm2	0.537611	2.8261e-05	0.000137339
Cdc42	-0.35569	2.84823e-05	0.000138343
Smarca3	0.518518	2.86922e-05	0.00013929
Sfxn5	-0.362519	2.87465e-05	0.000139481
Ppp1r13b	-0.359715	2.87992e-05	0.000139663
Snx3	-0.539439	2.88345e-05	0.000139762
Mnat1	-0.39322	2.88738e-05	0.000139879
Rod1	-0.399431	2.88978e-05	0.000139923
4432404J10Rik	0.335233	2.89204e-05	0.00013996
Cndp2	0.33208	2.90813e-05	0.000140665
Rps13	-0.386878	2.93436e-05	0.000141803
Dpep2	-0.365084	2.93469e-05	0.000141803
Tpm3	-0.384967	2.93664e-05	0.000141823
Vars2l	0.332179	2.95417e-05	0.000142596
Ceecam1	0.335936	2.96793e-05	0.000143186
Csprs	-0.385148	2.97303e-05	0.000143332
Nktr	0.333571	2.97403e-05	0.000143332
Cdca5	-0.480287	2.99998e-05	0.00014444
Bms1l	0.411655	3.00013e-05	0.00014444
3110001A13Rik	-0.416452	3.00932e-05	0.000144808
Rnpc2	0.484232	3.02512e-05	0.000145493
Fbxo33	-0.348305	3.02841e-05	0.000145524
Pmp22	0.351667	3.02888e-05	0.000145524
Tfrc	-0.628684	3.04033e-05	0.000145999
Clk4	0.435575	3.05718e-05	0.000146732
Ing4	0.399658	3.0614e-05	0.000146859
Asrij	-0.483555	3.08677e-05	0.000148
Hist2h2aa2	0.418434	3.09294e-05	0.000148219
Fhl3	-0.524311	3.10597e-05	0.000148728
Ppp1r16a	0.380693	3.10676e-05	0.000148728
6330569M22Rik	0.362833	3.11716e-05	0.00014915
Pias1	-0.35862	3.14198e-05	0.00015026
Lrpprc	0.425398	3.16435e-05	0.000151243
Syngr1	0.490848	3.16578e-05	0.000151243
Sdhb	-0.373377	3.17802e-05	0.00015175
1700025K23Rik	-0.434258	3.18174e-05	0.00015183
Sap30	-0.383616	3.18296e-05	0.00015183
Arhgef11	0.332386	3.20313e-05	0.000152714
Ddx54	0.317653	3.21108e-05	0.000153015
Pkn3	0.488495	3.22213e-05	0.000153463
Dok3	-0.34476	3.2333e-05	0.000153916
Ulk2	-0.406507	3.25005e-05	0.000154635
Slc39a9	0.427394	3.25349e-05	0.000154719
Fahd1	-0.356129	3.2597e-05	0.000154936
2700067E09Rik	0.304653	3.27923e-05	0.000155784
Lztr1	0.333431	3.31774e-05	0.000157533
Bid	0.306224	3.35821e-05	0.000159374
Nxt2	-0.412388	3.36314e-05	0.000159526
C77032	0.337868	3.38268e-05	0.000160372
Vkorc1	-0.520486	3.38594e-05	0.000160444
Btg1	-0.388561	3.42225e-05	0.000162083
Cdr2	-0.364834	3.42447e-05	0.000162106
Scrib	0.422633	3.43871e-05	0.000162697
Top2a	-0.475807	3.45492e-05	0.000163381
Skiv2l	0.418074	3.46334e-05	0.000163696
Nup43	-0.301547	3.46598e-05	0.000163737
BC025206	-0.356118	3.46922e-05	0.000163808
Cyfip2	0.46251	3.50687e-05	0.000165501
Furin	0.418983	3.52505e-05	0.000166275
Aoah	-0.337446	3.5324e-05	0.000166361
Vps11	0.350378	3.53257e-05	0.000166361
0610042C05Rik	0.350758	3.53401e-05	0.000166361
2012-09-08	0.458204	3.53066e-05	0.000166361
Manea	-0.431039	3.53663e-05	0.0001664
Drpla	0.391625	3.5498e-05	0.000166936
1500019C06Rik	0.383089	3.56879e-05	0.000167744
DXImx47e	0.383934	3.58964e-05	0.000168639
Prpf8	0.328321	3.61516e-05	0.000169752
Supt6h	0.414071	3.61734e-05	0.000169769
Wars	0.386815	3.62118e-05	0.000169864
Sh3bgrl	-0.419078	3.6265e-05	0.000170028
Vegfc	0.335515	3.63314e-05	0.000170253
Pte1	-0.330806	3.64137e-05	0.000170553
Arl6ip1	-0.291481	3.65343e-05	0.000171032
2810458H16Rik	-0.360536	3.66574e-05	0.000171522
1110007C24Rik	-0.392457	3.69704e-05	0.0001729
Rabggta	0.417669	3.71379e-05	0.000173596
1500003O03Rik	-0.472747	3.74326e-05	0.000174798
9830124H08Rik	0.389722	3.74305e-05	0.000174798
Pex6	0.311316	3.75103e-05	0.000175073
[truncated: 1,762 more rows]
