# Supplementary material for: Transcriptome Analysis of Genes Regulated by Cholesterol Loading in Two Strains of Mouse Macrophages Associates Lysosome Pathway and ER Stress Response with Atherosclerosis Susceptibility
Source: PLoS One. 2013 May 21;8(5):e65003. doi: 10.1371/journal.pone.0065003 (PMC3660362; doi:10.1371/journal.pone.0065003)
Supplement: Table S9 — Significant transcripts for cholesterol loading effect, with promoter regions 2 Kb to +2 Kb from the start site of transcription containing the motif TGACCGNNAGTRACCC, which matches annotation for NR1H3: nuclear receptor subfamily 1, group H, member 3 (DR4). (XLS) [file pone.0065003.s011.xls]

## Sheet: Sheet1
Table S9: Significant transcripts for cholesterol loading effect, with promoter regions 2Kb to +2Kb from the start site of transcription containing the motif TGACCGNNAGTRACCC,
	which matches annotation for NR1H3: nuclear receptor subfamily 1, group H, member 3 (DR4).
Experiment 1 samples					Experiment 2 samples
Gene Symbol	Log2Fold Change	P.Value	FDR Adjusted P-Value		Gene Symbol	Log2Fold Change	P.Value	FDR Adjusted P-Value
Mef2c	-1.2269	8.17809e-14	5.86055e-12		Mef2c	-1.47642	2.2603e-12	3.69048e-10
Dtx3	1.04447	2.85552e-12	1.29766e-10		Mef2c*	-1.38044	7.63437e-12	8.58435e-10
Stac2	1.02731	3.30418e-12	1.45197e-10		Abcg1	1.22551	1.65295e-09	5.98735e-08
Abcg1	0.749134	4.41122e-12	1.86795e-10		Mef2c*	-1.04015	1.46782e-07	2.48861e-06
Mef2c*	-0.710472	8.28164e-10	1.66634e-08		Bcl3	-0.674303	1.42826e-05	0.000117161
Acaca	-0.455357	5.46381e-08	6.08862e-07		Stac2	0.607074	3.08809e-05	0.000226923
Nr5a1	-0.541155	2.92586e-07	2.65407e-06		Pias1	-0.417361	4.79137e-05	0.000327145
Etv4	0.602706	6.67042e-07	5.36629e-06		Drd1a	0.664415	0.000111215	0.000667457
Cic	0.445081	3.56684e-06	2.32044e-05		Hdac4	0.752211	0.0002174	0.00118808
Taf11	-0.386608	6.68377e-06	3.95374e-05		Acsl3	0.414454	0.000429705	0.00211551
Ndufs2	-0.360428	1.04637e-05	5.82666e-05		Pum2	0.320216	0.00119756	0.00497171
Ndufs2*	-0.395804	1.21114e-05	6.60209e-05		Fkbp2	0.331922	0.00126506	0.0052012
Pias1	-0.35862	3.14198e-05	0.00015026		Taf11	-0.366149	0.00199172	0.00760846
Pex11b	-0.29142	6.05748e-05	0.00026581
Blvrb	-0.414644	6.43311e-05	0.000279138
Bcl3	-0.385264	0.000201256	0.000753882
Spop	-0.307144	0.00066806	0.00211761
Pum2	0.24437	0.00091378	0.00277018
Stag2	-0.309818	0.00349968	0.00884269
* Multiple probes
Overlapping genes between the two datasets are shown in bold.
