# Supplementary material for: Transcriptome Analysis of Genes Regulated by Cholesterol Loading in Two Strains of Mouse Macrophages Associates Lysosome Pathway and ER Stress Response with Atherosclerosis Susceptibility
Source: PLoS One. 2013 May 21;8(5):e65003. doi: 10.1371/journal.pone.0065003 (PMC3660362; doi:10.1371/journal.pone.0065003)
Supplement: Table S11 — Genes with a significant strain-cholesterol loading interaction effect in experiment 2. (XLS) [file pone.0065003.s013.xls]

## Sheet: Sheet1
Table S11: Genes with a significant strain-cholesterol loading interaction effect in experiment 2
Gene Symbol	Log2Fold Change	P.Value	FDR Adjusted P-Value
Ddit3	-2.62195	5.19397e-14	3.0365e-10
Aqp9	-3.69037	2.85184e-14	3.0365e-10
LOC100047619	-4.12466	7.64283e-14	3.0365e-10
Trib3	-4.06539	2.98756e-13	8.90217e-10
Nupr1	-2.37181	3.15286e-12	7.51579e-09
Cox6a2	-3.16529	4.28433e-12	8.51083e-09
Asns	-2.58234	8.07776e-12	1.37541e-08
Ccr5	2.24254	9.98855e-12	1.47394e-08
Slc1a4	-2.78517	1.11297e-11	1.47394e-08
Ccr5	2.39314	1.33991e-11	1.59704e-08
Ccr5	2.31201	1.56183e-11	1.63823e-08
Ifitm6	-2.59069	1.64936e-11	1.63823e-08
Cd86	-2.16163	2.20879e-11	1.95544e-08
Asns	-2.65741	2.29685e-11	1.95544e-08
Fcgr4	-1.89004	3.13804e-11	2.49349e-08
Gch1	-2.0462	7.60231e-11	5.66325e-08
Chac1	-4.7386	8.29073e-11	5.81277e-08
LOC100048556	-2.02896	9.13773e-11	6.0507e-08
Cd274	-1.83105	1.1144e-10	6.99082e-08
Rilpl2	-1.7208	1.25158e-10	7.45882e-08
Cd86	-2.26938	1.71006e-10	9.70582e-08
Stap1	1.87262	1.98804e-10	1.07707e-07
Tk1	2.88315	2.6946e-10	1.39639e-07
Mcm4	1.55466	2.84935e-10	1.41506e-07
Mthfd2	-2.05932	3.32332e-10	1.58443e-07
Mcm6	2.19739	3.5415e-10	1.61005e-07
Gdf15	-2.46513	3.64724e-10	1.61005e-07
Cxcl14	2.02782	4.47763e-10	1.90603e-07
Trib3	-2.38516	5.23719e-10	2.15249e-07
H2-DMa	1.41637	6.44788e-10	2.56174e-07
X99384	1.92068	7.75755e-10	2.88944e-07
Soat2	-2.70227	7.54307e-10	2.88944e-07
Clspn	2.27201	9.47817e-10	3.42334e-07
Sars	-1.26418	1.35244e-09	4.3567e-07
Cd86	-1.67179	1.34764e-09	4.3567e-07
Ppapdc1b	-1.75946	1.30799e-09	4.3567e-07
Slc6a9	-1.91799	1.34242e-09	4.3567e-07
Mcm6	2.295	1.57746e-09	4.82098e-07
Lbh	1.2215	1.56863e-09	4.82098e-07
Top2a	1.81219	1.81288e-09	5.14469e-07
Msh6	1.41511	1.79509e-09	5.14469e-07
Slc25a33	-1.8109	1.78535e-09	5.14469e-07
Aars	-1.23084	1.93919e-09	5.37518e-07
Mef2c	1.36033	2.09354e-09	5.67112e-07
Msh6	1.20245	2.15988e-09	5.72079e-07
Ephx1	1.61803	2.41592e-09	6.25985e-07
Abcb4	2.18261	2.46961e-09	6.26284e-07
Myd116	-1.35938	2.61961e-09	6.50483e-07
Herpud1	-1.45245	2.88888e-09	7.02706e-07
Mreg	-1.98655	3.80458e-09	9.06935e-07
Slco2b1	1.79636	3.92272e-09	9.16764e-07
Ddit3	-2.12364	4.55174e-09	1.04331e-06
Trib3	-2.53489	5.76201e-09	1.2958e-06
Serpina3g	-2.1476	6.36979e-09	1.40595e-06
Rad54l	1.55865	6.7522e-09	1.46326e-06
Dab2	1.23005	7.74362e-09	1.64815e-06
Mef2c	1.24618	8.8328e-09	1.84699e-06
Mcm5	1.91851	9.17208e-09	1.85292e-06
Rhobtb3	-1.87431	9.07346e-09	1.85292e-06
Phgdh	-1.88113	9.34624e-09	1.85663e-06
D3Ucla1	-1.46216	9.54957e-09	1.86592e-06
Pdgfb	1.44619	1.02303e-08	1.96669e-06
LOC625360	-2.29574	1.08579e-08	2.05421e-06
Cxcl14	2.19608	1.22294e-08	2.24249e-06
Lig1	1.97701	1.22077e-08	2.24249e-06
Uhrf1	2.56556	1.38796e-08	2.48637e-06
Phlda3	1.23727	1.39766e-08	2.48637e-06
E130016E03Rik	1.73073	1.44778e-08	2.53765e-06
Jdp2	-1.39119	1.50583e-08	2.60115e-06
A930010I20Rik	0.992213	1.86428e-08	3.17434e-06
Zranb3	1.2699	2.10428e-08	3.48345e-06
Il1a	-2.22355	2.08404e-08	3.48345e-06
Cdr2	-1.27748	2.21577e-08	3.61778e-06
Kcnn4	1.13986	2.3174e-08	3.66015e-06
Taf15	-1.31459	2.33385e-08	3.66015e-06
Sesn2	-1.43494	2.32368e-08	3.66015e-06
Col18a1	1.69931	2.41115e-08	3.73228e-06
Fgl2	-2.29449	2.53795e-08	3.87819e-06
Tyms	1.46526	2.67062e-08	4.02926e-06
Hmgn2	1.2677	2.72949e-08	4.06659e-06
Tpcn1	1.25532	3.10923e-08	4.51938e-06
Herpud1	-1.37213	3.07796e-08	4.51938e-06
Prc1	2.07849	3.22426e-08	4.58193e-06
Oit3	1.36952	3.22915e-08	4.58193e-06
Tgfbi	1.49334	3.35991e-08	4.6566e-06
Tes	-1.10264	3.34697e-08	4.6566e-06
Pbk	2.59661	3.46436e-08	4.74618e-06
LOC100045981	1.10131	3.52319e-08	4.77193e-06
Cd69	-1.76502	3.83222e-08	5.13216e-06
Slc44a1	1.18049	4.16679e-08	5.41612e-06
Mettl1	-1.29245	4.11492e-08	5.41612e-06
LOC100048556	-1.84273	4.18058e-08	5.41612e-06
Srm	-1.31921	4.28036e-08	5.48577e-06
Adssl1	1.04935	4.36085e-08	5.52946e-06
Clspn	1.77266	4.74776e-08	5.95669e-06
Plxdc1	1.43853	4.84869e-08	6.01996e-06
Adrb2	1.6087	5.12826e-08	6.23711e-06
Birc5	1.51428	5.08165e-08	6.23711e-06
Adssl1	1.06416	5.39115e-08	6.45175e-06
Arg2	-2.43434	5.41299e-08	6.45175e-06
BC031353	1.17005	5.94622e-08	7.01712e-06
Anln	1.60475	6.63875e-08	7.68226e-06
Dab2	1.15394	6.57844e-08	7.68226e-06
Ccl7	-2.38443	6.75752e-08	7.74451e-06
Sult1a1	1.64443	6.98844e-08	7.86194e-06
Fignl1	1.64142	6.99191e-08	7.86194e-06
Clecsf9	-1.37413	7.24051e-08	8.06539e-06
Ifi27	1.53443	7.48582e-08	8.26143e-06
Gpc1	1.404	7.83098e-08	8.56307e-06
Hspa9	-0.939378	9.48435e-08	1.02767e-05
Gars	-0.811983	9.9176e-08	1.06494e-05
Ptger2	-1.2643	1.03067e-07	1.09684e-05
Kynu	1.65164	1.07514e-07	1.12938e-05
C330023M02Rik	-1.01103	1.0802e-07	1.12938e-05
Egr2	1.19827	1.1231e-07	1.16402e-05
Tgfbi	1.43318	1.2223e-07	1.25591e-05
Sepw1	-1.00651	1.26995e-07	1.28275e-05
Ticam2	-1.03714	1.26545e-07	1.28275e-05
Nrm	1.2906	1.29085e-07	1.29291e-05
St3gal5	1.62023	1.42446e-07	1.40315e-05
Plec1	1.07272	1.42227e-07	1.40315e-05
Ptprs	1.22994	1.5329e-07	1.4976e-05
Nasp	1.04518	1.70605e-07	1.6532e-05
Itgb5	1.05195	1.8009e-07	1.73104e-05
Ltbp3	1.18854	1.90751e-07	1.81885e-05
LOC100047934	-0.974837	1.93666e-07	1.83198e-05
Mcm10	1.60643	1.98398e-07	1.86198e-05
Gch1	-1.30807	2.02522e-07	1.88583e-05
Atf5	-1.1074	2.06502e-07	1.90798e-05
Ap1b1	0.938656	2.2389e-07	2.03705e-05
Rbpms	-1.34821	2.22423e-07	2.03705e-05
Vegfa	-1.31981	2.37158e-07	2.14143e-05
Nusap1	1.56178	2.41775e-07	2.16671e-05
Nfe2l1	-0.91557	2.4559e-07	2.18447e-05
Tiam1	1.39266	2.57463e-07	2.27311e-05
Atf4	-1.32225	2.68618e-07	2.35416e-05
Slc6a13	-1.06148	2.83821e-07	2.46924e-05
Ssr3	-0.788454	3.09668e-07	2.65535e-05
Acsl3	-1.08401	3.08925e-07	2.65535e-05
Ilvbl	0.803722	3.12737e-07	2.66251e-05
Chaf1a	1.22736	3.4412e-07	2.90891e-05
Igf1	0.928379	3.6287e-07	3.04581e-05
Ifit2	-1.36123	3.72886e-07	3.10799e-05
Nars	-0.913635	3.85033e-07	3.18695e-05
Usp18	-1.26629	4.46364e-07	3.66912e-05
Sqstm1	-1.15094	4.721e-07	3.85408e-05
Olfm1	1.18729	4.80808e-07	3.89847e-05
Fbxo32	-1.32874	4.99261e-07	4.00951e-05
Psat1	-1.34648	5.01849e-07	4.00951e-05
Slc7a11	-2.16033	5.04594e-07	4.00951e-05
Ankrd47	1.39361	5.11076e-07	4.02236e-05
Extl3	0.884776	5.12962e-07	4.02236e-05
Phka2	0.982624	5.2013e-07	4.05191e-05
Mmp12	1.27227	5.23616e-07	4.05258e-05
Centd3	1.11469	5.37024e-07	4.12954e-05
Thbd	1.27947	5.52326e-07	4.21998e-05
D10Bwg1379e	-1.73963	5.65508e-07	4.29318e-05
E2f2	1.16457	5.71748e-07	4.31308e-05
Sesn1	0.878869	6.05554e-07	4.45531e-05
Map2k3	0.7469	5.98531e-07	4.45531e-05
Snca	-1.3409	6.03818e-07	4.45531e-05
St7	-1.41072	5.98521e-07	4.45531e-05
St6gal1	0.883776	6.18271e-07	4.52097e-05
Tmem39a	-1.04319	6.40032e-07	4.65155e-05
Fkbp11	-2.0751	6.66535e-07	4.8148e-05
Slamf8	-0.934465	6.72406e-07	4.82795e-05
6330416G13Rik	-0.920461	6.79508e-07	4.84973e-05
Nrcam	1.00318	6.83698e-07	4.85059e-05
Birc5	1.47258	7.30032e-07	5.14867e-05
E330036I19Rik	1.02235	7.50069e-07	5.18536e-05
Rnase4	1.01907	7.5381e-07	5.18536e-05
Rin2	0.956599	7.49813e-07	5.18536e-05
Slc25a44	-0.992905	7.56986e-07	5.18536e-05
Srm	-1.16972	7.39689e-07	5.18536e-05
Efcab4a	1.02312	7.76121e-07	5.28605e-05
Csf1r	0.945637	7.86989e-07	5.31734e-05
Clec4e	-1.3688	7.89638e-07	5.31734e-05
Cyp51	-0.935662	8.20506e-07	5.49416e-05
Asns	-1.71583	8.33082e-07	5.54721e-05
2010111I01Rik	1.09657	8.61199e-07	5.70257e-05
Ehd4	0.749888	8.91333e-07	5.83725e-05
1200009I06Rik	-0.875698	8.87601e-07	5.83725e-05
Lmnb1	1.47751	8.98472e-07	5.85185e-05
Igf1	1.0561	9.20436e-07	5.91655e-05
Rgs16	0.887825	9.23298e-07	5.91655e-05
Dnajb9	-1.24472	9.21453e-07	5.91655e-05
Pdia5	-1.09527	9.74504e-07	6.21129e-05
Bex4	-0.891151	1.01337e-06	6.42468e-05
Rab11fip5	0.780366	1.02211e-06	6.44577e-05
Dpep2	0.999842	1.03782e-06	6.51039e-05
H47	-0.940975	1.05251e-06	6.56799e-05
Fmnl3	0.841898	1.09489e-06	6.7969e-05
Fchsd2	1.00294	1.11851e-06	6.88692e-05
Acy1	-1.20509	1.12095e-06	6.88692e-05
Arg1	2.30669	1.1396e-06	6.96561e-05
Folr2	1.92667	1.15149e-06	7.00237e-05
Neurl	0.850133	1.17844e-06	7.12988e-05
Rpa1	0.825951	1.21319e-06	7.30304e-05
Pcdh7	1.32145	1.21933e-06	7.30314e-05
Rhob	1.3234	1.25397e-06	7.39905e-05
Rapsn	1.23517	1.25354e-06	7.39905e-05
Cd52	0.805754	1.24333e-06	7.39905e-05
Tlr13	0.868329	1.28767e-06	7.56045e-05
Ffar2	-1.50169	1.33498e-06	7.79984e-05
Rrm2	1.34522	1.36834e-06	7.95574e-05
Phka2	0.94842	1.45806e-06	8.43623e-05
S100a1	-0.9023	1.46901e-06	8.45852e-05
Slc39a7	-1.09089	1.52507e-06	8.7391e-05
Eprs	-0.811064	1.60927e-06	9.15851e-05
Il1b	-1.6553	1.61363e-06	9.15851e-05
Mocos	0.907659	1.62382e-06	9.17268e-05
Dpep2	0.961673	1.64108e-06	9.22644e-05
Dnmt1	0.789506	1.66449e-06	9.31414e-05
Cenpa	1.09749	1.67307e-06	9.31838e-05
Aldh18a1	-0.923341	1.68261e-06	9.32794e-05
Mmp10	1.02652	1.73276e-06	9.56146e-05
LOC435565	-1.26934	1.77042e-06	9.72428e-05
Cdca7	1.6868	1.78488e-06	9.75871e-05
Pqlc1	0.900258	1.81129e-06	9.85788e-05
Enc1	1.12741	1.86738e-06	0.00010117
Ltb	-1.52812	1.89412e-06	0.000102154
Pros1	0.807774	1.93413e-06	0.000103842
Wdhd1	1.0655	1.99049e-06	0.000105443
Hlx	0.880163	1.98922e-06	0.000105443
Ifit2	-1.24273	1.97897e-06	0.000105443
Acot1	1.1305	2.00852e-06	0.00010546
Rsad2	-1.24617	2.00414e-06	0.00010546
Wars	-0.904874	2.02746e-06	0.000105988
Cd14	0.996602	2.10763e-06	0.000109698
Cttnbp2nl	0.946361	2.16481e-06	0.000112184
Rhbdd1	-0.952734	2.18764e-06	0.000112876
Il15	-0.741764	2.21071e-06	0.00011347
Slc15a3	-0.790424	2.21817e-06	0.00011347
Casp4	-1.14964	2.2841e-06	0.000116343
Ank	0.967446	2.31466e-06	0.000117398
Fcna	-1.35474	2.33993e-06	0.000118176
Lpl	0.92865	2.37255e-06	0.000119318
Chst1	-1.04528	2.38977e-06	0.000119679
BC094916	-1.57954	2.42672e-06	0.000121021
Hspa9	-0.859244	2.52039e-06	0.000125169
Dok2	1.01569	2.57438e-06	0.000127165
Eprs	-1.06441	2.58192e-06	0.000127165
E2f2	1.00941	2.59422e-06	0.000127245
Tmed3	-0.814675	2.63999e-06	0.000128433
Srm	-1.33851	2.63206e-06	0.000128433
Cdc45l	1.07596	2.6612e-06	0.000128938
Irak2	-0.743985	2.75216e-06	0.00013227
Cxcl2	-1.91457	2.74362e-06	0.00013227
Msr2	2.42152	2.77606e-06	0.000132883
Alg2	-0.728374	2.81706e-06	0.000134306
Frmd6	1.14127	2.84016e-06	0.000134868
LOC100048346	-1.31757	2.85337e-06	0.000134958
Rrm1	0.964728	2.88528e-06	0.000135817
Irak2	-0.698537	2.89433e-06	0.000135817
AI451557	-0.847475	2.90751e-06	0.0001359
Ezh2	0.848392	2.96956e-06	0.000138258
H2-M2	1.45914	2.98789e-06	0.000138571
Aoah	-0.78006	3.05861e-06	0.000141301
Cdt1	1.27347	3.09923e-06	0.000142076
Nav1	0.748706	3.09167e-06	0.000142076
Insl6	-0.840752	3.1714e-06	0.000144317
Srprb	-0.877522	3.18444e-06	0.000144317
Mgll	-1.19823	3.18439e-06	0.000144317
Angptl2	1.24085	3.23239e-06	0.000145935
2010003J03Rik	-0.807552	3.40887e-06	0.000153322
Fyb	0.763983	3.42217e-06	0.000153341
Cdkn1c	-1.6292	3.43982e-06	0.000153555
Krtcap2	-0.806474	3.51224e-06	0.000156203
Tes	-1.06063	3.54938e-06	0.000157268
Mcm7	1.12302	3.57566e-06	0.000157845
Gdpd5	0.998707	3.62618e-06	0.000159485
Fbxo21	0.801913	3.74927e-06	0.000164292
Lbh	0.978928	3.81092e-06	0.000166382
H47	-0.989013	3.87622e-06	0.000168616
AI451617	-1.19186	3.95563e-06	0.000171444
LOC237877	0.905118	3.98411e-06	0.000172053
Selplg	0.837022	4.07078e-06	0.000175161
Tyms-ps	1.11686	4.08991e-06	0.000175351
Ebi2	1.37308	4.29115e-06	0.000181369
Map3k12	1.06948	4.28218e-06	0.000181369
Kif22	0.898583	4.27763e-06	0.000181369
Bcat2	-0.735779	4.26882e-06	0.000181369
6720458F09Rik	-0.731465	4.37525e-06	0.000184271
Tbc1d20	-0.776127	4.41008e-06	0.000185084
Slc8a1	0.896954	4.44888e-06	0.000186057
Klc4	0.7214	4.46618e-06	0.000186127
Tlr13	0.980392	4.5594e-06	0.000189324
Ddit4	-1.01531	4.57465e-06	0.000189324
Slc7a4	0.98185	4.64689e-06	0.000191483
Bcl2a1c	-1.26257	4.65894e-06	0.000191483
D14Ertd668e	-1.09294	4.83276e-06	0.000197944
Suv420h2	0.736062	4.91102e-06	0.000200461
Cdk2ap2	-0.821476	5.23198e-06	0.000212833
Susd3	1.01737	5.32286e-06	0.000215156
Bahcc1	0.93094	5.32519e-06	0.000215156
Inppl1	0.647689	5.49766e-06	0.000221374
Arl4c	1.1946	5.52237e-06	0.00022162
Fen1	0.816925	5.74188e-06	0.000229656
Rims3	-1.37981	5.7897e-06	0.000230794
Man2b1	0.630588	5.82815e-06	0.000231552
Il10ra	0.675098	5.88301e-06	0.000232184
Vamp4	-0.700581	5.88136e-06	0.000232184
Lxn	0.674106	5.97734e-06	0.000235129
LOC100046163	-0.826523	6.16839e-06	0.000241846
Abcc3	0.831721	6.279e-06	0.000245375
Yrdc	-0.950031	6.5272e-06	0.000254241
Igf2r	0.828561	6.5547e-06	0.00025448
Cope	-0.781402	7.03695e-06	0.000272316
1110017D15Rik	-0.776922	7.12801e-06	0.000274947
4930511J11Rik	-1.04806	7.16234e-06	0.00027538
Csf1r	1.1859	7.3757e-06	0.000282672
Zmat3	0.861844	7.58637e-06	0.000289814
P2ry6	0.771361	7.88995e-06	0.000300448
Clspn	1.28182	7.9594e-06	0.000301571
Relb	-1.02553	7.97004e-06	0.000301571
Parp1	0.645626	8.02285e-06	0.000301654
Kctd6	-0.83566	8.01896e-06	0.000301654
LOC100044204	0.811188	8.17774e-06	0.000306511
S100a11	0.690774	8.21363e-06	0.000306891
Wars	-0.957139	8.37766e-06	0.000312042
Galnt10	0.860663	8.45817e-06	0.000314059
Hat1	0.753242	8.60859e-06	0.000318651
Fgd2	1.17942	8.67589e-06	0.000320148
Add1	0.73868	8.96973e-06	0.00032997
Btbd6	0.945339	9.02878e-06	0.00033112
Extl3	0.67529	9.32436e-06	0.000340911
LOC667370	-1.16415	9.35638e-06	0.000341036
Mcfd2	-0.709524	9.415e-06	0.000342126
Stard5	-0.672277	9.48554e-06	0.000343642
Tle6	0.910696	9.63411e-06	0.000347967
Mrps28	-0.722357	9.70704e-06	0.000349192
Ccl2	-1.10369	9.72662e-06	0.000349192
Batf	-0.853643	9.8139e-06	0.000351267
Fam129b	0.744782	1.03787e-05	0.00037037
Slc9a3r1	0.654467	1.04673e-05	0.000372417
Rapsn	0.977959	1.05743e-05	0.000374187
Gosr2	-0.865684	1.05798e-05	0.000374187
Arhgap4	0.713052	1.06306e-05	0.000374869
Phka2	0.869556	1.14345e-05	0.000402028
Klf4	-1.01692	1.18017e-05	0.000413718
Rab11fip5	0.713491	1.18413e-05	0.00041389
Cryzl1	-0.751227	1.20225e-05	0.000418995
Haghl	0.678716	1.22744e-05	0.000426527
Cytip	1.08205	1.2611e-05	0.000435893
Emr1	0.894242	1.26171e-05	0.000435893
Hdac5	0.618118	1.27264e-05	0.0004384
Mettl9	-0.746645	1.28628e-05	0.000441819
Matk	1.03621	1.29862e-05	0.000444776
2310047M10Rik	0.794605	1.31281e-05	0.000448349
Gfi1	-0.960527	1.31707e-05	0.00044852
Plscr4	0.662105	1.33003e-05	0.000451642
Cope	-0.627899	1.34736e-05	0.000456227
Birc5	1.14196	1.3882e-05	0.000468723
Myo9b	0.583718	1.40016e-05	0.000471428
BC062650	-1.55749	1.4072e-05	0.000472464
Cdc6	0.957336	1.43842e-05	0.000481588
Tcf19	1.27073	1.46265e-05	0.000488329
Akr1b8	0.906428	1.47478e-05	0.000489636
Rrbp1	-0.820697	1.47076e-05	0.000489636
Bcl2a1d	-1.49832	1.48608e-05	0.000492018
Ilvbl	0.704429	1.52418e-05	0.000500657
Cd82	-0.705629	1.51904e-05	0.000500657
LOC216443	-0.74953	1.52478e-05	0.000500657
Gpr176	1.27721	1.56931e-05	0.000513333
BC003236	0.80855	1.572e-05	0.000513333
Dcakd	0.696289	1.58378e-05	0.000515766
Upp1	-0.991395	1.59307e-05	0.00051738
Mgst3	1.11351	1.68166e-05	0.000540263
Ptpn6	0.6417	1.67839e-05	0.000540263
Hipk1	-0.779896	1.67643e-05	0.000540263
Tst	-0.863782	1.6766e-05	0.000540263
Lrrc8	-0.827012	1.68887e-05	0.000541119
Sec61a1	-0.83644	1.74463e-05	0.000557488
Tnnc1	0.746312	1.7554e-05	0.00055943
Trem3	-1.00686	1.76779e-05	0.000561876
Chchd10	-0.771781	1.79186e-05	0.000568011
Syn1	0.684456	1.80358e-05	0.000570208
Irak3	-0.849445	1.81412e-05	0.000572024
2310008M10Rik	-0.778407	1.83056e-05	0.000575684
Aif1	0.932654	1.85684e-05	0.000580885
Abi2	0.88477	1.85416e-05	0.000580885
Nin	0.570554	1.87291e-05	0.000584378
Cd164	-0.85269	1.97924e-05	0.000615943
1500010J02Rik	0.92012	1.99323e-05	0.00061868
Bcl2l11	0.714185	2.00091e-05	0.000619449
Eng	0.877158	2.01698e-05	0.00062216
Prrc1	-0.618716	2.0201e-05	0.00062216
Azi2	-0.728761	2.03122e-05	0.000622369
Siglec1	-0.825667	2.02719e-05	0.000622369
Tmem42	-0.763689	2.06377e-05	0.000630719
Manba	0.718555	2.08998e-05	0.000637096
Vwa5a	0.555635	2.13867e-05	0.000650277
Gtse1	1.07621	2.18399e-05	0.000659921
Plxdc1	0.773481	2.187e-05	0.000659921
Sqle	-1.08655	2.18385e-05	0.000659921
1500010J02Rik	0.676337	2.21259e-05	0.000665957
Dusp28	-0.782072	2.22348e-05	0.000667548
Pex6	0.631357	2.23431e-05	0.000669115
Klra2	-1.3825	2.25835e-05	0.000674619
Ifrd1	-0.700088	2.28299e-05	0.00068005
Pfn2	-0.866866	2.28794e-05	0.00068005
Ctsc	-0.727502	2.31529e-05	0.000686465
Emp2	1.09728	2.35614e-05	0.000695168
Vegfa	-1.55266	2.3563e-05	0.000695168
P4hb	-0.575155	2.36255e-05	0.000695289
Kctd12b	0.744305	2.37154e-05	0.000696216
Pold1	0.845761	2.379e-05	0.000696691
Efcab4a	0.889364	2.41204e-05	0.000704635
Rasa1	0.866054	2.42208e-05	0.000705555
Fdps	-1.05311	2.42703e-05	0.000705555
Sod2	-0.661493	2.43485e-05	0.000706108
Slc24a3	1.19683	2.44425e-05	0.000707112
Eif5	-0.597053	2.46965e-05	0.000712729
Ift20	-0.634399	2.50168e-05	0.00072023
Dusp23	-0.695065	2.53497e-05	0.000728055
Itgam	0.617618	2.57435e-05	0.000737589
9430029K10Rik	-0.782338	2.58463e-05	0.000738757
Nasp	0.757156	2.59974e-05	0.000741299
Zfp36l1	0.996666	2.60632e-05	0.000741401
Insig1	-1.10153	2.62822e-05	0.000745852
LOC100046232	-0.963054	2.64732e-05	0.000749488
Mitf	0.868754	2.6869e-05	0.000758891
Gadd45g	-1.07437	2.74143e-05	0.00077246
B230312A22Rik	-0.729925	2.7609e-05	0.000776113
Cbx5	0.583227	2.94169e-05	0.000824988
Hmgn3	1.04935	2.97179e-05	0.000831473
Frag1	-0.960112	3.01562e-05	0.000839794
Asb2	-1.65204	3.0105e-05	0.000839794
Csprs	-0.91309	3.03092e-05	0.000841286
Mvd	-0.927733	3.03509e-05	0.000841286
Cdc20	1.15255	3.06578e-05	0.000847819
B3gnt8	0.724204	3.08772e-05	0.00085191
Cyp27a1	0.786363	3.1392e-05	0.00086293
Adam33	-1.00637	3.14214e-05	0.00086293
Hmgcl	0.598147	3.17234e-05	0.000869222
Abca3	0.583329	3.27649e-05	0.000895698
Ndc80	0.993757	3.28691e-05	0.00089649
Arhgap22	0.897497	3.30615e-05	0.00089968
Nisch	0.693478	3.31988e-05	0.000900397
Ssr2	-0.605758	3.32389e-05	0.000900397
Pvr	-0.851483	3.34498e-05	0.000902009
D16Ertd472e	-0.921324	3.34389e-05	0.000902009
Fblim1	-1.07204	3.43588e-05	0.00092443
Itga6	1.11911	3.47917e-05	0.000933969
Slc39a13	-0.825189	3.50195e-05	0.000937973
Icos	1.12615	3.57206e-05	0.000954606
Fbxo32	-1.2263	3.69552e-05	0.000985388
Mrps18b	-0.779706	3.75859e-05	0.000999968
Apbb2	0.932239	3.81009e-05	0.00100958
Eif1a	-0.663422	3.82011e-05	0.00100958
Usp18	-1.26425	3.81425e-05	0.00100958
Gamt	0.852682	3.83868e-05	0.00101224
Yif1b	-0.738656	3.89739e-05	0.00102545
Map3k14	0.860553	3.97044e-05	0.0010378
D930001I22Rik	-0.639657	3.96731e-05	0.0010378
Pla2g12a	-0.681445	3.95812e-05	0.0010378
Elk3	0.6725	3.98955e-05	0.00104051
LOC100047651	0.726015	4.00313e-05	0.00104178
Spred1	0.637405	4.04239e-05	0.0010497
Hspd1	-0.746669	4.1107e-05	0.00106491
LOC100048726	-0.794791	4.11884e-05	0.00106491
Ctage5	-0.653022	4.12975e-05	0.00106542
Mcm3	0.887173	4.17107e-05	0.00107376
Mbp	0.642123	4.25418e-05	0.00109279
Rps6ka1	0.524266	4.26864e-05	0.00109415
Prosapip1	0.56672	4.31465e-05	0.00110357
Cd9	0.788548	4.45147e-05	0.00113613
Arrdc4	-0.681985	4.47417e-05	0.00113948
Nip7	-0.631042	4.53959e-05	0.00115368
Nrp1	0.742884	4.57509e-05	0.00116022
Cdc20	0.96195	4.61956e-05	0.00116901
Optn	-1.01316	4.63938e-05	0.00117154
Metrn	0.58891	4.6971e-05	0.00118361
Gmpr	1.1153	4.78541e-05	0.00120078
Rcsd1	0.685039	4.78256e-05	0.00120078
Wdr76	0.798127	4.81618e-05	0.00120597
Hsd17b7	-0.803229	4.88868e-05	0.00122155
Fmnl3	0.698478	4.92915e-05	0.00122909
Nipsnap1	0.868335	4.97263e-05	0.00123734
2700007P21Rik	-0.670201	5.07362e-05	0.00125984
Ncaph	0.847622	5.09624e-05	0.00126283
Nckap1l	0.528905	5.14578e-05	0.00127246
Cd276	1.27722	5.18433e-05	0.001278
Trim47	1.02313	5.18962e-05	0.001278
Osbpl3	0.780439	5.20629e-05	0.00127946
2610507B11Rik	0.586696	5.29475e-05	0.00129852
Pygl	0.683894	5.34288e-05	0.00130763
Abi2	0.746485	5.40353e-05	0.00131727
Brca2	0.663945	5.40437e-05	0.00131727
Bcl9l	0.884919	5.41606e-05	0.00131743
Rrp9	-0.81129	5.45385e-05	0.00132392
Mybl2	1.19565	5.48383e-05	0.0013258
Gpr84	-1.3377	5.4793e-05	0.0013258
Nrp1	0.789909	5.60936e-05	0.00135067
Mxd4	0.710977	5.60897e-05	0.00135067
Cd300lf	-1.15471	5.64579e-05	0.0013567
Olfm1	1.00752	5.67348e-05	0.00135833
F5	-1.22164	5.6754e-05	0.00135833
Agfg1	-0.658225	5.86584e-05	0.0014011
Setd8	-0.746185	5.89023e-05	0.00140411
Adam15	0.594983	5.92951e-05	0.00141066
Ahnak	0.568649	5.94271e-05	0.00141098
Rrm2	1.2169	5.97494e-05	0.00141581
Parp1	0.737246	6.02259e-05	0.00142427
Tmem8	0.847479	6.24991e-05	0.00147219
Car13	-0.592151	6.24578e-05	0.00147219
Mx2	-0.912447	6.32921e-05	0.00148793
Gbp3	-0.975053	6.40518e-05	0.00150282
Endod1	0.639041	6.51606e-05	0.0015244
Wars	-0.881081	6.52274e-05	0.0015244
Casp2	0.648515	6.59514e-05	0.00153831
S100a4	1.22751	6.63692e-05	0.00154202
Tmed3	-0.66907	6.63689e-05	0.00154202
Prkd2	0.587899	6.66003e-05	0.00154438
Rap2a	0.72731	6.72306e-05	0.00155596
Gstt3	0.671466	6.77349e-05	0.0015646
Fam110b	0.665795	6.88207e-05	0.00158382
Pfn2	-1.12943	6.88326e-05	0.00158382
Ifitm1	1.12371	6.90207e-05	0.00158508
Ltb4r1	1.02166	6.96727e-05	0.00159698
Pde4dip	-0.684854	6.99828e-05	0.00160101
Gbp2	-0.664445	7.05155e-05	0.0016101
Mdk	0.850448	7.08618e-05	0.00161247
Anxa11	0.552023	7.08899e-05	0.00161247
Mospd1	-0.593981	7.11676e-05	0.00161571
Abca7	0.695088	7.23345e-05	0.00163908
Mlkl	-1.00002	7.43456e-05	0.00168145
Lrp1	0.893127	7.49373e-05	0.00168524
D10Ertd641e	-0.590558	7.4862e-05	0.00168524
Smad3	-0.785955	7.46989e-05	0.00168524
Serpinb12	0.910195	7.55119e-05	0.00169496
Ptpre	0.518612	7.60351e-05	0.00170311
Tyki	-0.753602	7.61608e-05	0.00170311
Bmf	1.01826	7.67449e-05	0.00171066
Cdc2a	0.791728	7.6786e-05	0.00171066
Srfbp1	-0.511547	7.69288e-05	0.00171066
5430435G22Rik	0.610564	7.70883e-05	0.00171102
Acox3	0.765342	7.72988e-05	0.0017125
Zfp36l1	0.627294	7.80418e-05	0.00172575
Gorasp2	-0.647132	7.82267e-05	0.00172664
Rgs10	0.800495	7.88933e-05	0.00173492
Hebp1	-0.702988	7.88325e-05	0.00173492
Mgl1	1.44332	7.93899e-05	0.00174263
Shmt2	-0.905418	7.99045e-05	0.0017507
Maged1	0.687891	8.06029e-05	0.00176276
B3galnt1	0.679046	8.07952e-05	0.00176373
Stard5	-0.582544	8.17975e-05	0.0017791
Ece2	-0.731938	8.17765e-05	0.0017791
Myo9b	0.521934	8.21567e-05	0.00178041
Upp1	-0.939035	8.20488e-05	0.00178041
Clec4n	-0.779549	8.2834e-05	0.00179183
Uxt	-0.574942	8.33164e-05	0.00179871
Tmem97	-0.648932	8.35757e-05	0.00179871
Ppap2b	-1.40086	8.36046e-05	0.00179871
AW049604	0.903819	8.38129e-05	0.00179994
B930041F14Rik	0.920821	8.40335e-05	0.00180143
Sbk	0.692638	8.47172e-05	0.00181283
Mgea6	-0.46561	8.49334e-05	0.0018142
Sort1	0.859265	8.57922e-05	0.00182926
Tnfaip2	-0.747924	8.67386e-05	0.00184285
Ccrl2	-0.966382	8.6609e-05	0.00184285
Tubb2b	0.58617	8.88942e-05	0.00188528
Adam23	-1.34727	8.92413e-05	0.00188929
Ptgir	-0.653554	8.99861e-05	0.00190167
Wdr6	0.651449	9.13934e-05	0.00192223
Oas1g	-0.659951	9.14424e-05	0.00192223
Med31	-0.744471	9.1335e-05	0.00192223
Ckb	0.622187	9.20266e-05	0.0019311
Clec4b1	-1.0123	9.25621e-05	0.00193892
Kif5c	0.823206	9.31008e-05	0.00194494
Tmem43	0.485837	9.31757e-05	0.00194494
Ncapd3	0.624599	9.38292e-05	0.00195516
Mad2l1	0.63595	9.4475e-05	0.00196176
Esam	-1.1725	9.44174e-05	0.00196176
Gpr84	-1.16157	9.46958e-05	0.00196292
Ifit3	-0.844351	9.4874e-05	0.0019632
Cdkn1a	0.713178	9.50554e-05	0.00196355
Fas	-0.798369	9.60622e-05	0.00198091
Dusp6	-0.867916	9.66352e-05	0.00198928
Gnl3	-0.716658	9.68305e-05	0.00198987
Mbp	0.499562	9.73446e-05	0.00199699
Ptp4a3	-0.793793	9.77046e-05	0.00200093
Sh3pxd2b	0.562495	9.90829e-05	0.00202438
Tnfaip2	-0.665626	9.91893e-05	0.00202438
Osm	-0.668291	0.000101634	0.00207072
Chaf1b	0.959008	0.000103211	0.00209775
Cyp27a1	0.749436	0.000103488	0.00209775
Agpat9	-1.07372	0.000103437	0.00209775
Rrad	-0.605364	0.00010388	0.00210211
Hmha1	0.637108	0.000104432	0.00210971
Agpat9	-0.614943	0.000104631	0.00211015
LOC100040592	-0.690176	0.000105978	0.00213371
Plk2	0.919696	0.000106652	0.00214364
Mettl1	-1.1226	0.000106894	0.00214489
E2f1	0.625419	0.000107681	0.00215706
Nap1l1	0.597865	0.000108724	0.0021743
Irgm1	-0.686168	0.000109804	0.00219221
Heatr5a	0.660543	0.000110577	0.00220396
Ptprs	0.923627	0.000112329	0.00222401
Agfg2	0.562612	0.000112044	0.00222401
Samd8	-0.733634	0.000112122	0.00222401
Rasgrp1	-1.66735	0.00011227	0.00222401
Bcl6	0.552134	0.000112614	0.00222595
Chic2	-0.672847	0.000112943	0.00222876
Pmp22	0.593261	0.000114572	0.00225716
Calu	-0.523665	0.000115245	0.00226667
Cul7	0.833121	0.000115474	0.00226743
BC004044	0.787097	0.00011649	0.00228362
Ift20	-0.675722	0.000118107	0.00231152
Bcor	0.694373	0.000119686	0.00233127
H6pd	0.596002	0.00011992	0.00233127
Recql5	0.570616	0.000120094	0.00233127
Mov10	-0.624276	0.000119932	0.00233127
Pilrb1	-1.42708	0.000119622	0.00233127
Plscr1	-0.597329	0.000121716	0.00235892
Tagap	-0.790778	0.000122053	0.0023616
BC004728	0.517647	0.000123711	0.0023898
Mrps10	-0.677246	0.000123931	0.00239019
Rasgrp3	1.1084	0.000124303	0.00239349
Gnb4	0.68318	0.000124678	0.00239683
Cd180	0.613429	0.000125451	0.00240394
Kctd6	-0.7028	0.000125311	0.00240394
2310008H09Rik	-0.762042	0.000126372	0.00241384
1700019H03Rik	-0.845665	0.000126365	0.00241384
Tlr8	0.668551	0.000127242	0.00242656
Fkbp2	-0.59849	0.000128373	0.00244336
Kdelr2	-0.683843	0.000128533	0.00244336
Slc39a7	-0.779285	0.000128989	0.00244812
Ggta1	0.591155	0.000129215	0.00244852
Casp4	-0.971258	0.000130287	0.00246491
D17Wsu104e	-0.658109	0.000132712	0.00250681
Xylt2	0.60435	0.000133645	0.00252044
Gab1	0.627101	0.000136342	0.00256724
Dnaja3	-0.465438	0.000137584	0.00258653
Aaas	0.756363	0.00013843	0.00259834
Rps6ka5	0.742412	0.000142563	0.00267075
LOC100045887	0.54549	0.000142736	0.00267075
Ccl4	-0.788623	0.000144305	0.00269588
Isg20	-1.44679	0.000145545	0.00271479
Eif4g2	-0.545108	0.000147078	0.00273909
Lrrc8d	-0.516425	0.000147535	0.00273995
2210021J22Rik	-0.800358	0.000147583	0.00273995
Napsa	0.845328	0.000150643	0.00279241
Ppbp	1.11984	0.000151131	0.0027971
Cyb5r1	-0.79549	0.000153158	0.00283021
Lass5	0.579604	0.000154243	0.00284586
Plekhg2	0.786852	0.000154992	0.00285526
Spc25	0.850602	0.000156129	0.00287176
2700038C09Rik	-0.623179	0.000159342	0.00292634
Sepn1	0.63677	0.000160149	0.00293664
Plk1	0.825594	0.000160635	0.00294102
Hhex	0.636911	0.000161516	0.0029481
Cryl1	0.498032	0.000161294	0.0029481
Snx15	-0.541835	0.000162661	0.00296446
1810049H13Rik	0.53243	0.000163418	0.00297282
C230021P08Rik	-0.805122	0.000163619	0.00297282
Clk1	0.684388	0.000164438	0.00298316
Pam	1.21191	0.00016482	0.00298554
Rapsn	0.881129	0.000165203	0.00298795
Nuak1	0.85233	0.000166877	0.00300455
Khk	0.592828	0.000166834	0.00300455
2310016C08Rik	-0.860511	0.000166387	0.00300455
Nlrx1	0.579261	0.000167214	0.00300606
Drd1a	-0.902215	0.000169421	0.00304116
Lmna	0.573046	0.000170106	0.00304429
Oas1g	-0.682338	0.000169957	0.00304429
Aurka	0.6402	0.000170776	0.0030517
Tpk1	0.588944	0.00017117	0.00305416
Emp1	0.658158	0.000171724	0.00305946
P2ry1	1.05675	0.000173642	0.00308901
Ahnak	0.767558	0.000174891	0.00310198
Nr1h3	-0.848669	0.00017478	0.00310198
2310003H01Rik	0.598509	0.000175998	0.00311696
Ppa1	-0.536489	0.000176573	0.00312252
Cpne8	0.593779	0.000178802	0.00315725
Tmem150	-0.611321	0.000179184	0.00315931
Clec4a1	1.09736	0.000182723	0.00321658
Sgsh	0.996614	0.000182972	0.00321658
Cdc14b	0.743289	0.000186908	0.00327894
Hdac5	0.633632	0.00018707	0.00327894
Cpeb2	0.65454	0.000187433	0.00328049
Emr1	0.928983	0.000189027	0.00329387
Kif4	0.835736	0.000188825	0.00329387
Mif4gd	0.541519	0.000188605	0.00329387
Capn5	0.609763	0.000189896	0.00330419
Cd300lb	0.74463	0.000193433	0.00335594
Sdad1	-0.504509	0.000193316	0.00335594
Crtap	0.640918	0.000194125	0.00336305
Mmp13	0.707348	0.000195268	0.0033745
Crym	-1.13399	0.000195352	0.0033745
Stambpl1	-0.580725	0.000197603	0.00340623
Mtmr3	-0.626704	0.000197761	0.00340623
Accs	0.60111	0.000200823	0.00345065
3110001A13Rik	-0.991542	0.000200919	0.00345065
Dus4l	-0.668819	0.000201676	0.00345868
Cdca2	1.13431	0.000203091	0.00347793
Dad1	-0.544829	0.00020529	0.00350887
Nfkbiz	-1.13253	0.000205487	0.00350887
Fnbp1	0.734976	0.00020599	0.00351243
Lzic	-0.714061	0.000206458	0.00351539
1700065O13Rik	0.726956	0.000206801	0.00351621
Iqce	0.577783	0.000207658	0.00352103
Mgll	-1.37814	0.000207675	0.00352103
Hexb	0.674742	0.000209131	0.00354068
Rab3il1	0.670326	0.000209763	0.00354634
Cnr2	0.681516	0.000210564	0.00355483
Tubb2b	0.636462	0.000211558	0.00356657
Kctd2	0.53687	0.000211938	0.00356792
Clta	0.462864	0.000213832	0.00359473
Sesn1	0.73904	0.0002235	0.00374669
Ccl25	-0.698449	0.00022339	0.00374669
Mbc2	0.526487	0.000223895	0.00374804
Lmo4	-0.531278	0.000225064	0.00376233
Pigz	0.687782	0.000228558	0.00381004
Sqle	-1.01014	0.000228355	0.00381004
Rhbdf1	0.598637	0.000229306	0.00381718
Ifit3	-0.842703	0.000230346	0.00382914
Gm129	-0.752854	0.000232442	0.00385861
Uaca	0.583364	0.000233887	0.0038772
Atf4	-1.19869	0.00023447	0.00388145
BC031853	-0.489	0.000237227	0.00392165
6430706D22Rik	0.676484	0.000239024	0.00394588
Tipin	0.684949	0.000240171	0.00395934
Crcp	-0.561161	0.000241005	0.0039676
Pdia4	-0.678378	0.000242359	0.00398438
2610003J06Rik	0.487702	0.000243235	0.00399328
A2bp1	-1.33372	0.000244802	0.00401347
Mef2c	0.798819	0.00024642	0.00403446
Gadd45a	-0.889523	0.000247206	0.00404177
Cbx7	0.638858	0.000248147	0.0040516
Tsc22d2	-0.57646	0.000248697	0.00405502
Prkd3	0.574701	0.00025099	0.00408682
Gpsn2	-0.543081	0.000251363	0.0040873
Cebpb	-0.496616	0.000252514	0.00410044
Naprt1	0.782511	0.000254848	0.0041327
Sell	-0.72948	0.000256438	0.00415284
Slamf7	-0.771361	0.000260056	0.0042057
Helb	0.62291	0.000262361	0.00423724
P2ry12	0.683674	0.000263701	0.00425312
Bcl2l11	0.535757	0.000266618	0.00429436
Tpcn1	0.998316	0.000268318	0.00431009
2410004L22Rik	0.578369	0.000268076	0.00431009
Pfkp	-0.7277	0.000268684	0.00431016
Daxx	-0.555964	0.000270403	0.00433189
Tmem167	-0.645568	0.00027416	0.00438619
Sipa1l1	-0.697283	0.000274973	0.00438986
0610037D15Rik	-0.698334	0.000275126	0.00438986
Rac3	0.662402	0.000276312	0.0044029
Abca9	0.87777	0.000279548	0.00444477
Spp1	0.724973	0.000279686	0.00444477
Osbpl2	-0.464193	0.000281722	0.00447117
Actn1	0.538544	0.000283225	0.00448904
Sec61b	-0.444442	0.000283641	0.00448967
Tmem132a	0.735831	0.000284439	0.00449633
Eif5	-0.792265	0.000286655	0.00452535
6430527G18Rik	0.630451	0.000287764	0.00453684
Vim	0.573211	0.000290888	0.00458005
H13	-0.610375	0.00029192	0.00459022
B3gnt3	-0.609186	0.000293367	0.0046069
Ciapin1	-0.459251	0.000294658	0.00462109
LOC100046457	-0.684665	0.000296064	0.00463704
Spag5	1.13553	0.000298199	0.00466435
Tnfaip2	-0.658328	0.000300851	0.00469967
2410066E13Rik	0.646092	0.000302482	0.00471896
Vars	-0.663094	0.000304085	0.00473777
Fam132a	0.583989	0.000305109	0.00474752
Farsb	-0.520239	0.000306104	0.00475679
Gats	0.581393	0.000308406	0.00478632
Sort1	0.729052	0.000309074	0.00479045
Cd97	0.529097	0.000313505	0.00485281
2510009E07Rik	0.503494	0.000316587	0.00489416
Sars	-1.10267	0.000330532	0.00510312
LOC100045284	-0.624798	0.000331543	0.00511211
Gpsn2	-0.459679	0.000332823	0.00512522
Agap1	0.569926	0.000335214	0.00515537
Prune	-0.60608	0.000336698	0.00517153
Orc5l	0.446933	0.000339869	0.00520223
Ccdc134	-0.530188	0.000340006	0.00520223
Ccdc86	-0.531554	0.000339198	0.00520223
I830077J02Rik	-0.775206	0.00034325	0.00524512
Nt5m	-0.568677	0.000344007	0.00524996
4933428G20Rik	0.54464	0.000345249	0.00526217
Rabac1	-0.422334	0.000348165	0.00529985
Asna1	-0.45409	0.000349266	0.00530982
Tcf4	0.728744	0.000350998	0.00532936
1110001A07Rik	0.71739	0.00035471	0.00537887
Cdca3	0.902551	0.000360148	0.00544747
Gtpbp2	-0.614902	0.000359792	0.00544747
Chchd6	-0.556363	0.000362655	0.00547843
Ahdc1	0.578473	0.000365504	0.00550763
Sec61g	-0.587112	0.000365512	0.00550763
Fhod1	0.618421	0.000370393	0.0055671
Arhgap25	0.503724	0.000370237	0.0055671
Slc11a2	-0.65204	0.000371343	0.00557435
Psip1	0.509559	0.000372425	0.00558357
Timeless	0.848827	0.000377637	0.00564167
Rhoc	0.777286	0.000377195	0.00564167
Rcan1	0.691242	0.000377721	0.00564167
Tpd52	0.424108	0.000382632	0.00570788
Magee1	0.6656	0.00038333	0.00571113
Blm	0.506346	0.000384439	0.00571178
Cux1	0.501766	0.000384717	0.00571178
Foxred1	-0.599894	0.000384811	0.00571178
D630023F18Rik	0.901387	0.000395203	0.00585874
Txnip	0.580353	0.000399844	0.00592017
Cnn2	-0.868883	0.000408315	0.00603809
L3mbtl3	-0.63759	0.000410577	0.00606402
2010305A19Rik	-0.586363	0.000411603	0.00607166
Hagh	-0.552339	0.000414903	0.00611234
Fcgr2b	-0.553009	0.000415387	0.00611234
Zscan12	0.461389	0.000416556	0.00612199
Rdm1	0.566636	0.000418625	0.00614032
Cyp27a1	0.525896	0.000418834	0.00614032
Cd300a	-0.638466	0.000420176	0.00615243
Pigp	0.52986	0.000421813	0.00616126
Dgkh	-0.933467	0.000421492	0.00616126
Ttc13	0.551033	0.000422539	0.00616432
Fgd4	0.564708	0.000425749	0.00620355
Snca	-1.07381	0.000430418	0.00626392
Ikzf1	0.67951	0.0004319	0.00627782
Slc7a2	-0.705931	0.000437039	0.00634478
Sema4a	0.969101	0.000439406	0.00636364
Aplp2	0.504496	0.000438956	0.00636364
Ilvbl	0.649989	0.00044095	0.00637498
Pno1	-0.62079	0.000441258	0.00637498
Wipi1	0.593273	0.000444063	0.00640773
Mdk	0.757947	0.000449723	0.00646805
Hip1	0.634639	0.000449871	0.00646805
Tnpo2	-0.607419	0.000448912	0.00646805
Mum1	0.580868	0.000455247	0.00653746
Creb3l2	-1.03583	0.000457265	0.00655854
Polk	0.687791	0.000460986	0.00659717
Slfn2	-0.794727	0.000461066	0.00659717
Vti1a	-0.49494	0.000466218	0.00666289
Ccl9	0.62399	0.000467876	0.00667059
Stat1	-0.553889	0.000467635	0.00667059
Preb	-0.530167	0.000474799	0.00676121
Znrf1	-0.456404	0.000475926	0.00676916
4833426J09Rik	-0.458064	0.000476625	0.00677103
Abhd12	0.950424	0.000484534	0.00687519
Glg1	0.543407	0.000485199	0.00687644
Rabif	-0.58446	0.000486712	0.00688969
BC004728	0.587012	0.000488136	0.00690166
Pkn2	-0.526393	0.000489503	0.00691278
Adck1	-0.452832	0.000490646	0.00691612
Piga	-0.591615	0.0004909	0.00691612
Pkm2	0.424271	0.0004927	0.00693328
Slc43a2	0.65896	0.000493325	0.00693389
Zdhhc6	-0.420363	0.000498826	0.00700296
Kntc1	0.803334	0.000500133	0.00701305
Eif2b1	-0.608177	0.000502662	0.00704022
2610039C10Rik	0.597207	0.000504978	0.00705607
Mrc1	0.550691	0.000504716	0.00705607
Clm3	0.831795	0.000508573	0.00709798
Hdhd2	-0.559625	0.000509172	0.00709804
Agxt2l2	0.747841	0.000510019	0.00710154
Tspan17	0.481129	0.000511161	0.00710914
Dscr1	0.512551	0.000511929	0.00711152
Erdr1	-1.26102	0.000514214	0.00713494
Rars	-0.495	0.000515732	0.00714768
Igsf4a	0.7213	0.000521273	0.00719026
Tmem110	0.564048	0.000522424	0.00719026
Akr7a5	0.495149	0.000522157	0.00719026
Ankrd40	0.402872	0.000522092	0.00719026
Ncrna00117	-0.495819	0.000519863	0.00719026
Lysmd1	-0.683629	0.000521897	0.00719026
Cib2	0.573987	0.000525012	0.00720095
Cxcl9	-0.64238	0.000524684	0.00720095
Arpc5l	-0.742496	0.000524336	0.00720095
Dph3	-0.529377	0.00053447	0.00731383
Srprb	-0.649783	0.000534094	0.00731383
Pitpna	0.500561	0.000537116	0.0073332
Trim32	0.484486	0.000536943	0.0073332
EG433016	0.90769	0.000539147	0.00735251
Slc40a1	0.659133	0.000545301	0.00740223
Crtap	0.522337	0.000545898	0.00740223
Csde1	-0.40708	0.000545688	0.00740223
Odc1	-0.526876	0.000544029	0.00740223
Hif1a	-0.567683	0.000544637	0.00740223
Inpp5f	0.676259	0.000551317	0.00746715
Pde2a	-0.736759	0.000551939	0.00746715
Polr2h	-0.593771	0.000558585	0.0075485
1110032E23Rik	0.657226	0.000562892	0.00759809
Plk4	1.01935	0.00056638	0.0076281
Banf1	-0.576942	0.000566395	0.0076281
Tigd2	-0.627733	0.000573687	0.00771757
2810485I05Rik	0.447717	0.000575506	0.00773332
Ermp1	0.539453	0.000577452	0.00773402
Pdia6	-0.646815	0.000577505	0.00773402
Trabd	-0.692446	0.000577119	0.00773402
Cd300a	-0.909122	0.000578319	0.00773623
Stard8	0.456776	0.000584043	0.00780405
Wwp2	0.403592	0.000589307	0.00785172
Bid	-0.508962	0.000588695	0.00785172
Siah2	-0.64327	0.000589587	0.00785172
Xrcc6	0.46415	0.000593227	0.00789137
Aldh2	0.423726	0.000603111	0.00801391
Chic2	-0.479851	0.000605675	0.00803007
Smyd5	-0.747189	0.000605121	0.00803007
Ptk2b	0.481996	0.000611399	0.00809696
Slc29a3	-0.464772	0.00061402	0.00812265
Ccdc47	-0.640077	0.000621558	0.00821325
2310039H08Rik	-0.490035	0.000622511	0.00821673
Pnpla2	-0.501289	0.000623825	0.00822497
Iars	-0.607955	0.000633329	0.00834105
Gorasp2	-0.63631	0.000634178	0.00834301
Dnajc16	0.620272	0.00063973	0.00840677
Cdc20	0.837062	0.000643264	0.0084439
Src	0.587271	0.000645569	0.00845554
Stk40	-0.966271	0.000645417	0.00845554
Matk	0.738253	0.000649343	0.00849563
Flii	0.55373	0.000651648	0.00850943
Nsf	0.470767	0.000651826	0.00850943
Blcap	-0.399707	0.000655121	0.00854309
Ncaph2	0.466785	0.000657835	0.00856911
Timm8a1	-0.618859	0.000660067	0.0085888
Haghl	0.590191	0.000661951	0.00860392
Iqgap3	0.629675	0.000664604	0.00862899
Qsox1	-0.524885	0.000668081	0.0086647
9030025P20Rik	0.547601	0.000670473	0.00868627
9030025P20Rik	0.523645	0.000672165	0.00869874
LOC100045617	0.461313	0.000673814	0.00870118
Evi5	-0.580867	0.000673257	0.00870118
4933439C20Rik	0.561	0.000676368	0.00870586
Txndc13	0.546785	0.000676249	0.00870586
4930455C21Rik	-0.574162	0.000675761	0.00870586
Orc6l	0.578681	0.000679931	0.00874229
LOC100048537	-0.809859	0.000689829	0.00885999
Brip1	0.613978	0.000692008	0.00887178
Rars	-0.54946	0.000692236	0.00887178
Pgam5	-0.412199	0.000695695	0.00890654
Fbxo32	-1.01177	0.000697654	0.00892204
Mcm2	0.930928	0.000701089	0.00895636
Plekhg3	0.433416	0.000709367	0.00905241
Surf4	-0.46246	0.000711818	0.00907397
Lig1	0.786461	0.000713217	0.00908209
Ttc15	0.585443	0.000717297	0.00912429
Fbxw4	0.647605	0.000719809	0.00914649
Cc2d2a	0.545206	0.00072353	0.00918398
Zfp710	0.471435	0.000728706	0.00923984
Alg12	-0.723413	0.000733985	0.00929689
Stard4	0.529818	0.000739917	0.00936207
Psenen	-0.436936	0.000745661	0.00941045
Top1mt	-0.604362	0.00074584	0.00941045
Slco3a1	-0.629733	0.000746109	0.00941045
Zmiz1	0.841756	0.000747051	0.00941236
Snap23	-0.451022	0.000756382	0.00951987
Cxcl1	-1.54895	0.000760955	0.00956733
Trmt2b	0.539223	0.000761952	0.00956976
Zfp30	0.547797	0.000764162	0.00958742
Tmed9	-0.448311	0.000765342	0.00959212
Tm6sf1	0.486523	0.000773124	0.00967948
Csda	-0.672773	0.00078002	0.00974534
B230312I18Rik	-0.814407	0.000779665	0.00974534
Uba5	-0.462373	0.000780903	0.00974616
Arhgap25	0.692082	0.000785174	0.00977899
Inpp5k	0.59717	0.000785103	0.00977899
Daglb	0.808455	0.000793768	0.0098757
Rab32	-0.503201	0.000795978	0.00989287
Bcl2l11	0.793639	0.000802482	0.00993228
Satb1	0.714482	0.00080008	0.00993228
Acp2	-0.521314	0.000801371	0.00993228
Atp8a1	-0.547469	0.000802116	0.00993228
Ywhah	0.404702	0.000804489	0.00994679
Plekhg2	0.671344	0.000805549	0.00994957
